# Supplementary material for: Effects of heat stress on growth performance, carcass traits, serum metabolism, and intestinal microflora of meat rabbits
Source: Front Microbiol. 2022 Nov 28;13:998095. doi: 10.3389/fmicb.2022.998095 (PMC9743647; doi:10.3389/fmicb.2022.998095)
Supplement: Supplementary file 2 [file Data_Sheet_1.xlsx]

## Sheet: Sheet1
ID	Metabolite	Metab ID	KEGG Pathway ID	KEGG Pathway Description	KEGG Compound ID	Library ID	Mode	KEGG Compound First Category	KEGG Compound Second Category	KEGG Pathway First Category	KEGG Pathway Second Category	HMDB Superclass	HMDB Class	M/Z	Adducts	Formula	Retention time	RSD	Fragmentation Score	Theoretical Fragmentation Score	Mass Error	CAS ID	HMDB Subclass	S_1	S_2	S_3	S_4	S_5	S_6	C_1	C_2	C_3	C_4	C_5	C_6	QC01	QC02	QC03
pos_7	Ursodeoxycholic acid	metab_6	-	-	C07880	HMDB0000946;LMST04010033	pos	Steroids	24-Carbon atoms	-	-	Lipids and lipid-like molecules	Steroids and steroid derivatives	357.279	M+H-2H2O, 2M+Na, 2M+H, M+H-H2O, M+K, M+NH4, M+Na	C24H40O4	7.0495	0.0664176	50.8	-	0.351516	128-13-2	Bile acids, alcohols and derivatives	4.7279	4.5576	4.4694	4.7002	4.8178	4.3296	4.8121	4.4316	4.5449	4.6244	4.3479	4.5635	4.6506	4.6147	4.5941
pos_12	(±)13-HpODE	metab_11	-	-	-	-	pos	-	-	-	-	-	-	295.226	M+H-H2O, 2M+Na, M+Na, M+NH4, M+H, M+H-2H2O	C18H32O4	7.9348	0.101448	56.8	-	-1.05517	-	-	3.8528	3.6901	3.3367	3.5747	3.4393	3.0985	4.5473	2.9587	3.9434	2.9855	4.5731	3.2153	4.0689	4.1386	4.1539
pos_16	Aflatoxin B1 dialcohol	metab_15	-	-	-	HMDB0011672	pos	-	-	-	-	Organoheterocyclic compounds	Naphthofurans	348.144	M+NH4, 2M+H, M+Na, M+K, M+H-H2O, M+H-2H2O	C18H18O6	4.1105	0.0758285	-	54.2	0.58016	-	Not Available	3.8477	3.5959	3.6385	3.1934	3.4312	3.8221	3.8539	4.4263	3.5016	4.2878	3.2666	3.116	3.7037	3.7544	3.6944
pos_21	3alpha-Hydroxyoreadone	metab_20	-	-	-	HMDB0036047	pos	-	-	-	-	Organoheterocyclic compounds	Naphthofurans	235.132	M+H-H2O, M+H, M+Na, M+H-2H2O, M+NH4	C14H20O4	5.9419	0.129221	-	64.9	-1.87552	124869-06-3	Not Available	2.1293	1.927	2.294	2.4712	1.8845	1.7604	2.6714	1.954	2.6959	2.0588	2.9873	1.6794	2.2567	2.3601	2.3549
pos_22	TXB2	metab_21	map00590;map01100;map04976;map04726	Arachidonic acid metabolism;Metabolic pathways;Bile secretion;Serotonergic synapse	C05963	LMFA03030002	pos	Lipids	Eicosanoids	Metabolism;Metabolism;Organismal Systems;Organismal Systems	Lipid metabolism;Global and overview maps;Digestive system;Nervous system	-	-	335.222	M+H-2H2O, M+K, M+NH4, M+Na, M+H-H2O	C20H34O6	5.6665	0.0011621	60	-	0.13634	-	-	3.5732	3.3887	3.402	3.627	3.4063	3.7324	3.674	3.7813	3.7659	3.6171	3.5457	3.3333	3.5691	3.5697	3.5687
pos_32	3-keto Petromyzonol	metab_31	-	-	-	-	pos	-	-	-	-	-	-	357.279	M+H-2H2O, 2M+Na, 2M+H, M+H-H2O, M+NH4	C24H40O4	7.1505	0.0586277	54.6	-	-0.206248	-	-	4.1417	4.0069	4.0359	4.1228	4.3757	4.0517	4.3632	4.1128	3.9827	4.2027	3.7492	4.0262	4.1448	4.1456	4.1886
pos_55	LysoPC(16:1(9Z))	metab_54	map00564;map05231	Glycerophospholipid metabolism;Choline metabolism in cancer	C04230	-	pos	Lipids	Phospholipids	Metabolism;Human Diseases	Lipid metabolism;Cancers: Overview	-	-	494.324	M+H, 2M+H, M+K, M+Na	C24H48NO7P	7.9348	0.0484951	58.3	-	-0.472259	-	-	4.6273	4.6781	4.6061	4.4297	4.7305	4.8012	4.808	4.8382	4.5573	4.8161	4.839	4.5541	4.6869	4.7246	4.7231
pos_92	Traumatic acid	metab_91	map00592	alpha-Linolenic acid metabolism	C16308	LMFA01170002;HMDB0000933	pos	-	-	Metabolism	Lipid metabolism	Lipids and lipid-like molecules	Fatty Acyls	251.126	M+H-2H2O, M+Na, M+H-H2O, M+H	C12H20O4	5.6987	0.032317	-	64	-1.8228	6402-36-4	Fatty acids and conjugates	2.3374	2.1753	2.3276	2.4988	2.6971	2.7216	2.8531	2.082	2.7501	2.1423	2.8902	2.428	2.584	2.5878	2.6097
pos_102	Chenodeoxycholic Acid	metab_101	map01100;map04976;map00120	Metabolic pathways;Bile secretion;Primary bile acid biosynthesis	C02528	HMDB0000518;LMST04010032	pos	Steroids	24-Carbon atoms	Metabolism;Organismal Systems;Metabolism	Global and overview maps;Digestive system;Lipid metabolism	Lipids and lipid-like molecules	Steroids and steroid derivatives	357.279	M+H-2H2O, M+H-H2O, M+Na, M+NH4	C24H40O4	6.8523	0.0330418	54.9	-	0.220351	474-25-9	Bile acids, alcohols and derivatives	3.8627	3.7106	3.594	3.6313	3.8993	3.5456	3.9407	3.6637	3.6545	3.8072	3.379	3.0638	3.7049	3.6942	3.7225
pos_106	Pregnan-20-one, 17-(acetyloxy)-3-hydroxy-6-methyl-, (3a,5b,6a)-	metab_105	-	-	-	-	pos	-	-	-	-	-	-	391.284	M+H, 2M+Na, M+Na, M+K	C24H38O4	7.0985	0.0413297	88.3	-	-0.295269	-	-	3.9524	3.651	3.6968	3.8929	4.2654	3.5969	4.3176	3.7553	3.7095	3.7591	3.6414	3.8789	3.9447	3.909	3.9309
pos_118	PC(16:0/0:0)[U]	metab_117	-	-	-	-	pos	-	-	-	-	-	-	496.34	M+H, M+Na, M+K, M+H-H2O	C24H50NO7P	8.3437	0.0491551	73.1	-	0.804195	-	-	5.2349	5.2104	5.3174	5.2084	5.2578	5.3357	5.3246	5.2594	5.1895	5.3131	5.1999	5.2841	5.2771	5.2931	5.2506
pos_119	Crucigasterin 277	metab_118	-	-	-	LMSP01080036	pos	-	-	-	-	-	-	278.247	M+H, M+K, M+Na, 2M+H	C18H31NO	8.5561	0.0154222	55.6	-	-1.25271	-	-	4.8448	4.8032	4.8373	4.7621	4.4741	4.6635	4.6606	4.8263	4.9415	4.765	4.8013	4.7806	4.774	4.7656	4.7788
pos_120	PE(16:0/0:0)	metab_119	-	-	-	LMGP02050002	pos	-	-	-	-	-	-	454.293	M+H, 2M+H, M+Na, M+H-H2O	C21H44NO7P	8.5749	0.0343242	92.9	-	-0.432238	-	-	4.0019	4.062	4.2401	3.928	4.016	4.2885	4.1744	3.9538	3.8445	4.1465	4.0441	4.0936	4.0753	4.0536	4.047
pos_121	Linoleamide	metab_120	-	-	-	LMFA08010008;HMDB0062656	pos	-	-	-	-	Lipids and lipid-like molecules	Fatty Acyls	280.263	M+H, 2M+H, M+K, M+Na	C18H33NO	8.8935	0.0308453	55.8	-	-0.0373315	3072-13-7	Fatty amides	6.2265	6.1879	6.2074	6.1615	6.0736	6.157	6.1539	6.2218	6.2415	6.1921	6.1886	6.1971	6.2047	6.1792	6.1996
pos_123	1-arachidonoyl-2-hydroxy-sn-glycero-3-phosphate	metab_122	-	-	-	-	pos	-	-	-	-	-	-	459.251	M+H, M+Na, M+NH4, M+H-H2O	C23H39O7P	9.0532	0.0900791	71.8	-	0.350072	-	-	3.2994	3.2752	3.2131	3.4536	3.3642	3.6917	3.5295	3.624	3.2409	3.3131	3.4945	3.4483	3.4837	3.4517	3.4052
pos_124	PE(18:0/0:0)	metab_123	-	-	-	LMGP02050001	pos	-	-	-	-	-	-	482.325	M+Na, 2M+H, M+H, M+H-H2O	C23H48NO7P	9.1934	0.0231756	58.8	-	1.77649	-	-	4.6612	4.6746	4.8068	4.6124	4.6674	4.8179	4.7687	4.6216	4.5527	4.7821	4.6736	4.7571	4.7029	4.7079	4.6884
pos_155	Inosine	metab_154	map01100;map00230	Metabolic pathways;Purine metabolism	C00294	HMDB0000195	pos	-	-	Metabolism;Metabolism	Global and overview maps;Nucleotide metabolism	Nucleosides, nucleotides, and analogues	Purine nucleosides	269.088	M+Na, 2M+H, M+H	C10H12N4O5	1.1651	0.182778	96.5	-	-1.60397	58-63-9	Not Available	3.1217	3.0237	3.1001	3.0918	2.9184	3.2227	3.1119	3.1672	3.1351	2.8785	2.8452	3.0228	3.062	3.0926	2.9348
pos_161	Cinnamic acid	metab_160	-	-	C10438	HMDB0000567	pos	-	-	-	-	Phenylpropanoids and polyketides	Cinnamic acids and derivatives	166.086	M+H, M+NH4, M+H-H2O	C9H8O2	1.9249	0.0675569	-	51.3	-4.61511	621-82-9	Cinnamic acids	3.9458	3.9436	4.0304	4.0029	3.9386	3.9403	4.0937	4.0226	4.1338	3.7752	3.8998	4.1242	3.9802	3.9647	4.0208
pos_196	Bisacurone epoxide	metab_195	-	-	-	HMDB0038503	pos	-	-	-	-	Lipids and lipid-like molecules	Prenol lipids	291.157	M+H-2H2O, M+Na, M+H-H2O	C15H24O4	6.664	0.0703242	-	58	-0.772118	127214-83-9	Sesquiterpenoids	1.2891	1.5219	0.5536	1.4749	1.1442	0.362	2.3783	0.3622	2.1192	0.7337	2.6502	0.359	1.8475	1.8214	1.8812
pos_225	LysoPC(14:0)	metab_224	-	-	-	-	pos	-	-	-	-	-	-	468.308	M+H, 2M+H, M+Na	C22H46NO7P	7.7668	0.0237501	63.5	-	-0.649049	-	-	4.0563	4.0156	4.0031	3.8624	4.1591	4.2207	4.1588	4.1357	4.0177	4.1617	4.095	4.0263	4.0758	4.0816	4.0958
pos_245	LPA(18:2(9Z,12Z)/0:0)	metab_244	-	-	-	LMGP10050017	pos	-	-	-	-	-	-	417.24	M+H-H2O, M+Na, M+H	C21H39O7P	9.1558	0.0504426	65.4	-	1.02493	-	-	3.4488	3.5378	3.1751	3.2425	3.4879	3.5099	3.4932	3.464	3.3549	3.3373	3.3943	3.1859	3.4207	3.3769	3.402
pos_250	Bis(2-ethylhexyl) phthalate	metab_249	-	-	-	-	pos	-	-	-	-	-	-	391.285	M+H, 2M+Na, M+Na	C24H38O4	9.779	0.0546202	73.7	-	1.22525	-	-	4.3165	4.2161	4.1467	4.2349	4.0772	4.1536	4.173	4.2605	4.2486	4.222	4.123	4.1175	4.1737	4.2212	4.1999
pos_291	Sphingosine-1-phosphate	metab_290	map01100;map04666;map05152;map00600;map04080;map04020;map04371;map04072;map04071	Metabolic pathways;Fc gamma R-mediated phagocytosis;Tuberculosis;Sphingolipid metabolism;Neuroactive ligand-receptor interaction;Calcium signaling pathway;Apelin signaling pathway;Phospholipase D signaling pathway;Sphingolipid signaling pathway	C06124	LMSP01050001	pos	-	-	Metabolism;Organismal Systems;Human Diseases;Metabolism;Environmental Information Processing;Environmental Information Processing;Environmental Information Processing;Environmental Information Processing;Environmental Information Processing	Global and overview maps;Immune system;Infectious diseases: Bacterial;Lipid metabolism;Signaling molecules and interaction;Signal transduction;Signal transduction;Signal transduction;Signal transduction	-	-	380.256	M+H, 2M+H, M+H-H2O	C18H38NO5P	8.0414	0.0636601	82.5	-	-0.461746	-	-	3.9184	3.943	3.7662	3.9078	3.948	3.9452	4.1015	4.0983	4.107	3.8754	4.0442	4.0645	3.9476	3.9587	3.9994
pos_300	PGB1	metab_299	-	-	C00959	LMFA03010131	pos	Lipids	Eicosanoids	-	-	-	-	337.238	M+H, M+Na, M+NH4	C20H32O4	7.8937	0.200346	61	-	0.759555	-	-	1.4916	1.2741	0.6528	1.1169	0.8788	0.599	2.9552	0.5993	2.0731	0.5596	2.9242	0.5951	2.2447	2.0705	2.2055
pos_304	PA(15:0/20:4(8Z,11Z,14Z,17Z))	metab_303	-	-	-	HMDB0114822	pos	-	-	-	-	Lipids and lipid-like molecules	Glycerophospholipids	700.476	M+H, M+ACN+Na, M+NH4	C38H67O8P	7.7961	0.264217	-	63.8	-1.61063	-	Glycerophosphates	1.4836	2.1338	1.9853	2.3842	1.809	1.3539	1.3345	1.5431	1.9271	1.38	2.1804	2.1652	1.8103	1.9936	1.8066
pos_310	2-(5,8-Tetradecadienyl)cyclobutanone	metab_309	-	-	-	HMDB0037519	pos	-	-	-	-	Organic oxygen compounds	Organooxygen compounds	280.263	M+H, M+NH4, M+H-H2O	C18H30O	7.5084	0.047704	-	75.6	0.11146	152245-81-3	Carbonyl compounds	4.392	4.2924	4.2853	4.2029	4.0582	4.2775	4.195	4.4236	4.4256	4.3098	4.268	4.2732	4.2619	4.3032	4.2869
pos_324	17a,21-Dihydroxy-5b-pregnane-3,11,20-trione	metab_323	map00140	Steroid hormone biosynthesis	C05469	HMDB0006758	pos	-	-	Metabolism	Lipid metabolism	Lipids and lipid-like molecules	Steroids and steroid derivatives	401.192	M+H-2H2O, M+H-H2O, M+K	C21H30O5	6.5353	0.0863758	-	61.9	-2.38521	68-54-2	Hydroxysteroids	2.5026	1.8435	1.8986	1.9191	1.5653	1.9303	1.7357	1.8724	1.9485	1.8905	1.666	1.1808	1.8325	1.8625	1.7884
pos_353	Deoxycytidine	metab_352	map00240	Pyrimidine metabolism	C00881	HMDB0000014	pos	Nucleic acids	Nucleosides	Metabolism	Nucleotide metabolism	Nucleosides, nucleotides, and analogues	Pyrimidine nucleosides	269.124	M+ACN+H, M+ACN+Na, 2M+K	C9H13N3O4	0.666	0.0916874	-	61.3	-2.97552	951-77-9	Pyrimidine 2'-deoxyribonucleosides	1.7316	1.7754	1.8091	1.981	1.8188	1.6352	1.6023	1.8852	1.9388	1.8452	1.968	1.6263	1.7551	1.7559	1.8218
pos_356	Cytidine	metab_355	map00240;map01100	Pyrimidine metabolism;Metabolic pathways	C00475;C02961	HMDB0000089	pos	Nucleic acids;-	Nucleosides;-	Metabolism;Metabolism	Nucleotide metabolism;Global and overview maps	Nucleosides, nucleotides, and analogues	Pyrimidine nucleosides	266.074	M+Na, 2M+Na, M+H	C9H13N3O5	0.6563	0.138176	67.6	-	-1.63391	65-46-3	Not Available	2.3541	2.3844	2.2995	2.4106	2.1959	2.2285	2.4433	2.3464	2.5503	2.4569	2.4788	2.2996	2.3031	2.3679	2.4234
pos_358	P-CHLOROPHENYLALANINE	metab_357	-	-	-	-	pos	-	-	-	-	-	-	200.047	M+H, 2M+H, M+Na	C9H10ClNO2	2.881	0.0124763	75.3	-	-2.03634	-	-	4.7914	4.7775	4.8116	4.7746	4.8065	4.7926	4.8666	4.8408	4.8874	4.8283	4.7495	4.7561	4.7879	4.7986	4.7922
pos_440	Eremopetasidione	metab_439	-	-	-	HMDB0040778	pos	-	-	-	-	Lipids and lipid-like molecules	Prenol lipids	237.149	M+H, M+NH4, M+H-H2O	C14H20O3	6.1645	0.254025	-	55.9	0.62147	163135-94-2	Sesquiterpenoids	2.656	2.7624	2.6069	2.9636	2.4056	2.452	3.4403	2.7621	3.1883	2.084	3.3442	2.5274	2.8938	2.7362	2.9641
pos_515	L-Proline	metab_514	map01100;map04978;map02010;map00330;map01230;map04974;map00970;map05230	Metabolic pathways;Mineral absorption;ABC transporters;Arginine and proline metabolism;Biosynthesis of amino acids;Protein digestion and absorption;Aminoacyl-tRNA biosynthesis;Central carbon metabolism in cancer	C00148	HMDB0000162	pos	Peptides	Amino acids	Metabolism;Organismal Systems;Environmental Information Processing;Metabolism;Metabolism;Organismal Systems;Genetic Information Processing;Human Diseases	Global and overview maps;Digestive system;Membrane transport;Amino acid metabolism;Global and overview maps;Digestive system;Translation;Cancers: Overview	Organic acids and derivatives	Carboxylic acids and derivatives	116.07	M+H, M+NH4	C5H9NO2	0.5147	0.0233021	83.5	-	-2.41262	147-85-3	Amino acids, peptides, and analogues	1.9502	1.979	1.8705	2.0066	1.828	1.8951	2.0354	1.8881	1.914	1.9027	1.8157	1.8965	1.9309	1.9345	1.9156
pos_516	Methylpyrazine	metab_515	-	-	-	HMDB0033112	pos	-	-	-	-	Organoheterocyclic compounds	Diazines	112.087	M+H, M+NH4	C5H6N2	0.5052	0.0105158	57.1	-	4.06967	109-08-0	Pyrazines	2.3635	2.1591	1.9204	2.6859	2.2257	2.6152	2.2563	2.1142	2.3724	2.0687	2.1149	2.2615	2.3296	2.3224	2.3308
pos_528	Glucose	metab_527	map01200;map04964;map02010;map04922;map04742;map01100;map00520;map00051;map00524;map00052;map04068;map00010;map00500;map00030;map04066;map04978;map04973;map04976;map04152;map04910;map04911;map05230;map04917;map04932;map04933;map04930;map04931	Carbon metabolism;Proximal tubule bicarbonate reclamation;ABC transporters;Glucagon signaling pathway;Taste transduction;Metabolic pathways;Amino sugar and nucleotide sugar metabolism;Fructose and mannose metabolism;Neomycin, kanamycin and gentamicin biosynthesis;Galactose metabolism;FoxO signaling pathway;Glycolysis / Gluconeogenesis;Starch and sucrose metabolism;Pentose phosphate pathway;HIF-1 …	C00221;C00031;C00267	-	pos	-;Carbohydrates;-	-;Monosaccharides;-	Metabolism;Organismal Systems;Environmental Information Processing;Organismal Systems;Organismal Systems;Metabolism;Metabolism;Metabolism;Metabolism;Metabolism;Environmental Information Processing;Metabolism;Metabolism;Metabolism;Environmental Information Processing;Organismal Systems;Organismal Systems;Organismal Systems;Environmental Information Processing;Organismal Systems;Organismal Systems;…	Global and overview maps;Excretory system;Membrane transport;Endocrine system;Sensory system;Global and overview maps;Carbohydrate metabolism;Carbohydrate metabolism;Biosynthesis of other secondary metabolites;Carbohydrate metabolism;Signal transduction;Carbohydrate metabolism;Carbohydrate metabolism;Carbohydrate metabolism;Signal transduction;Digestive system;Digestive system;Digestive system;Si…	-	-	383.116	M+K, 2M+Na	C6H12O6	0.5982	0.0291401	50.7	-	-3.86996	-	-	3.4799	3.5885	3.6115	3.5206	3.5449	3.5761	3.4798	3.6742	3.6213	3.6074	3.4976	3.5364	3.5578	3.5428	3.568
pos_552	(2R,3R,4R)-2-Amino-4-hydroxy-3-methylpentanoic acid	metab_551	-	-	-	HMDB0029449;LMFA01050440	pos	-	-	-	-	Organic acids and derivatives	Carboxylic acids and derivatives	130.086	M+H-H2O, M+H	C6H13NO3	0.7138	0.0415427	-	63.7	-2.57894	-	Amino acids, peptides, and analogues	1.9836	1.9452	2.0281	1.8971	1.9499	2.0302	1.9091	2.4948	2.0645	2.1558	2.0583	2.0337	2.053	2.0888	2.0725
pos_668	Lactosyceramide (d18:1/18:1(9Z))	metab_667	map00600;map01100	Sphingolipid metabolism;Metabolic pathways	C01290	HMDB0011592	pos	Lipids	Glycolipids	Metabolism;Metabolism	Lipid metabolism;Global and overview maps	Lipids and lipid-like molecules	Sphingolipids	466.809	M+2Na, M+H+Na	C48H89NO13	5.9419	0.0686577	-	66.6	6.90808	-	Glycosphingolipids	2.8151	2.8151	2.9977	3.1304	2.9857	2.8153	2.7266	2.8516	2.8832	2.9099	2.9929	2.6824	2.9118	2.9033	2.8555
pos_669	C12:4n-2,4,8,10	metab_668	-	-	-	LMFA01030240	pos	-	-	-	-	-	-	210.148	M+H, M+NH4	C12H16O2	5.9522	0.182107	50.6	-	-0.0870805	-	-	2.1326	2.0167	2.4508	2.142	1.5232	1.9374	1.8872	2.2216	2.4462	2.3168	2.1824	1.9647	2.0354	2.191	2.1043
pos_684	Glycocholic Acid	metab_683	map01100;map04976;map00120	Metabolic pathways;Bile secretion;Primary bile acid biosynthesis	C01921	HMDB0000138;LMST05030001	pos	Steroids	24-Carbon atoms	Metabolism;Organismal Systems;Metabolism	Global and overview maps;Digestive system;Lipid metabolism	Lipids and lipid-like molecules	Steroids and steroid derivatives	466.316	M+H, M+Na	C26H43NO6	6.2405	0.0789069	79.9	-	-0.33835	475-31-0	Bile acids, alcohols and derivatives	2.6766	3.4088	2.4567	2.8059	2.5887	3.1137	2.6651	3.4529	2.9151	2.2899	2.4214	2.0713	2.9189	2.8845	2.953
pos_715	9S,11R,15S-trihydroxy-2,3-dinor-13E-prostaenoic acid-cyclo[8S,12R]	metab_714	map00590	Arachidonic acid metabolism	C14795	LMFA03010154	pos	-	-	Metabolism	Lipid metabolism	-	-	329.234	M+H, M+NH4	C18H32O5	6.6098	0.067873	61.3	-	4.07811	-	-	1.2464	1.2569	1.038	1.9019	1.6773	1.9661	2.5043	1.1007	1.6154	1.1906	1.7804	2.2812	1.9026	1.9406	1.884
pos_771	9(10)-EpODE	metab_770	-	-	-	HMDB0010220	pos	-	-	-	-	Lipids and lipid-like molecules	Fatty Acyls	336.251	M+NH4, M+ACN+H	C18H30O3	7.0435	0.09466	-	52.6	-0.405846	-	Fatty acids and conjugates	2.922	2.5746	2.8501	2.6924	2.6363	2.6958	2.8793	2.8266	2.9929	2.7198	2.6518	2.6887	2.7153	2.7973	2.7551
pos_788	25,26-epoxy-1alpha-hydroxyvitamin D3	metab_787	-	-	-	LMST03020161	pos	-	-	-	-	-	-	415.317	M+H, M+Na	C27H42O3	7.217	0.0444411	72.8	-	-9.31871	-	-	2.6188	2.4917	2.4824	2.3616	2.5113	2.647	2.6136	2.5654	2.5811	2.5943	2.4223	2.5718	2.5218	2.5541	2.5569
pos_873	Alpha-Linolenic acid	metab_872	map01100;map00592;map01040	Metabolic pathways;alpha-Linolenic acid metabolism;Biosynthesis of unsaturated fatty acids	C06427	LMFA01030152;HMDB0001388	pos	Lipids	Fatty acids	Metabolism;Metabolism;Metabolism	Global and overview maps;Lipid metabolism;Lipid metabolism	Lipids and lipid-like molecules	Fatty Acyls	296.258	M+NH4, 2M+K	C18H30O2	7.7763	0.0479897	-	74.5	-0.586379	463-40-1	Lineolic acids and derivatives	4.5832	4.5292	4.6103	4.4141	4.3059	4.4739	4.4866	4.5811	4.6585	4.478	4.5033	4.4676	4.4694	4.5068	4.5052
pos_904	7-Dehydrodesmosterol	metab_903	map01100;map00100	Metabolic pathways;Steroid biosynthesis	C05107	HMDB0003896	pos	-	-	Metabolism;Metabolism	Global and overview maps;Lipid metabolism	Lipids and lipid-like molecules	Steroids and steroid derivatives	383.331	M+H-H2O, M+H	C27H42O	8.0511	0.241078	-	55.8	-0.0620523	1715-86-2	Cholestane steroids	2.9995	2.8382	2.7369	3.0386	2.9108	3.1675	3.1448	2.98	3.0369	3.0006	2.6881	3.1735	2.8901	2.9289	3.0794
pos_931	PC(20:2(11Z,14Z)/0:0)	metab_930	-	-	-	LMGP01050132	pos	-	-	-	-	-	-	548.371	M+H, M+Na	C28H54NO7P	8.7337	0.0141618	62.9	-	-0.0866838	-	-	4.6958	4.452	4.5202	3.9579	4.4302	4.5908	4.3964	4.5789	4.3105	4.6451	4.3663	4.1973	4.4431	4.455	4.4463
pos_934	1-heptadecanoyl-sn-glycero-3-phosphocholine	metab_933	-	-	-	LMGP01050024	pos	-	-	-	-	-	-	510.356	M+H, M+Na	C25H52NO7P	8.7994	0.0280989	71	-	0.674026	-	-	4.845	4.8222	4.9416	4.7329	4.9765	4.9218	4.8084	4.8372	4.8065	4.8785	4.7304	4.8415	4.84	4.8216	4.8449
pos_940	Farnesyl acetone	metab_939	-	-	-	-	pos	-	-	-	-	-	-	263.237	M+H, M+H-H2O	C18H30O	8.8935	0.0315327	80.2	-	-1.01066	-	-	4.7605	4.7176	4.7435	4.6996	4.6435	4.7062	4.707	4.7823	4.809	4.7396	4.7048	4.715	4.7195	4.7379	4.7113
pos_944	2-acetyl-1-alkyl-sn-glycero-3-phosphocholine	metab_943	map00565;map01100;map04080;map05310	Ether lipid metabolism;Metabolic pathways;Neuroactive ligand-receptor interaction;Asthma	C04598	HMDB0062195	pos	-	-	Metabolism;Metabolism;Environmental Information Processing;Human Diseases	Lipid metabolism;Global and overview maps;Signaling molecules and interaction;Immune diseases	Lipids and lipid-like molecules	Glycerophospholipids	546.353	M+Na, M+K	C26H54NO7P	9.0814	0.0444039	-	54.6	0.590313	74389-68-7	Glycerophosphocholines	3.8043	3.7507	3.8497	3.7241	3.7458	3.7411	3.7866	3.78	3.8394	3.742	3.6596	3.7317	3.7588	3.7238	3.7282
pos_951	MG(18:1(9Z)/0:0/0:0)[rac]	metab_950	-	-	-	LMGL01010005	pos	-	-	-	-	-	-	379.282	M+H, M+Na	C21H40O4	9.344	0.110094	66.9	-	4.46889	-	-	2.1312	2.2087	2.698	2.1517	1.6511	1.5922	2.6063	2.5211	2.1127	1.9697	2.0855	2.8786	2.2512	2.3401	2.3323
pos_1001	L-a-Lysophosphatidylserine	metab_1000	-	-	-	-	pos	-	-	-	-	-	-	526.314	M+H, M+Na	C24H48NO9P	9.893	0.0523927	72.2	-	0.259707	-	-	2.5926	2.6547	2.534	3.1435	2.7109	3.2746	2.9774	2.8844	2.7892	2.6269	2.6062	2.4388	2.801	2.8461	2.8309
pos_1028	PI(16:0/0:0)	metab_1027	-	-	-	LMGP06050002	pos	-	-	-	-	-	-	595.286	M+H, M+Na	C25H49O12P	10.0712	0.106712	53.9	-	2.22161	-	-	1.9755	2.6384	2.4966	2.1141	1.1664	2.64	2.1894	2.5317	2.5024	2.5371	2.1227	1.4359	2.32	2.3678	2.4126
pos_1066	2alpha-(3-Hydroxypropyl)-1alpha,25-dihydroxy-19-norvitamin D3	metab_1065	-	-	-	LMST03020627	pos	-	-	-	-	-	-	463.378	M+H, M+Na	C29H50O4	10.4486	0.0917713	64	-	-0.239874	-	-	2.1495	2.3235	2.8161	1.9452	1.8542	1.9824	2.0761	2.4495	2.1244	2.3525	3.1156	2.7774	2.4796	2.48	2.547
pos_1188	DG(15:0/18:3(9Z,12Z,15Z)/0:0)	metab_1187	-	-	-	HMDB0007076	pos	-	-	-	-	Lipids and lipid-like molecules	Fatty Acyls	559.472	M+H-H2O, M+Na	C36H64O5	10.3266	0.128379	-	78.9	-0.9927	-	Lineolic acids and derivatives	3.2361	1.3278	1.6545	1.5347	1.2889	1.2644	1.3995	1.3555	1.7959	0.9317	0.1773	1.3624	1.6732	1.7834	1.7345
pos_1203	6-[5]-ladderane-1-hexanol	metab_1202	-	-	-	LMFA05000063	pos	-	-	-	-	-	-	584.474	M+H, 2M+ACN+Na	C18H28O	9.072	0.152087	79.1	-	-4.24311	-	-	2.7855	2.4381	2.4055	2.5853	2.2001	2.4538	2.6337	2.4307	2.3543	2.1624	2.168	2.0315	2.5059	2.6259	2.5284
pos_1216	Enantio-PAF C-16	metab_1215	-	-	-	-	pos	-	-	-	-	-	-	524.372	M+H-H2O, M+H	C26H54NO7P	8.9875	0.0489346	50.8	-	-1.04653	-	-	5.1055	5.088	5.1207	5.0959	5.1227	5.1047	5.0256	5.0692	5.1087	5.097	5.1075	5.1879	5.0907	5.1166	5.1331
pos_1305	PC(15:1(9Z)/0:0)	metab_1304	-	-	-	LMGP01050125	pos	-	-	-	-	-	-	480.308	M+H, M+Na	C23H46NO7P	7.8064	0.0813729	57.7	-	-0.41612	-	-	2.8607	2.5783	2.8747	2.7249	3.224	3.1672	3.0074	2.9342	2.724	2.8855	2.7206	2.635	2.8357	2.8662	2.9058
pos_1323	12S-HHT	metab_1322	-	-	C20388	HMDB0012535	pos	-	-	-	-	Lipids and lipid-like molecules	Fatty Acyls	263.2	M+H-H2O, M+Na	C17H28O3	7.3466	0.0240421	-	59.1	-0.971972	54397-84-1	Fatty acids and conjugates	3.271	3.1438	3.1551	3.39	3.1872	3.5288	3.503	3.5744	3.5046	3.4045	3.3031	3.1535	3.3352	3.3305	3.3504
pos_1370	Zedoarondiol	metab_1369	-	-	-	HMDB0036448	pos	-	-	-	-	Lipids and lipid-like molecules	Prenol lipids	235.169	M+H-H2O, M+H	C15H24O3	6.905	0.183892	-	59.1	-2.59172	98644-24-7	Sesquiterpenoids	1.052	0.8022	0.3865	0.8575	0.6535	0.7674	2.3746	0.5573	1.7068	0.4865	2.46	0.3643	1.7118	1.6081	1.5639
pos_1393	LysoPE(0:0/18:0)	metab_1392	-	-	-	HMDB0011129;LMGP02050038	pos	-	-	-	-	Lipids and lipid-like molecules	Glycerophospholipids	499.336	M+H-H2O, M+NH4	C23H48NO7P	6.6425	0.107015	-	58.4	-4.91008	-	Glycerophosphoethanolamines	2.5119	2.6653	2.6503	2.7041	2.7123	2.5686	2.6086	2.6455	2.5549	2.5631	2.6668	2.5742	2.6895	2.5996	2.6726
pos_1410	(13E)-11a-Hydroxy-9,15-dioxoprost-13-enoic acid	metab_1409	-	-	C04654	HMDB0001320	pos	-	-	-	-	Lipids and lipid-like molecules	Fatty Acyls	317.21	M+H-2H2O, M+NH4	C20H32O5	6.4808	0.0176225	-	66.1	-2.30229	22973-19-9	Eicosanoids	2.6996	1.2625	0.8666	1.4561	0.5178	1.3581	1.776	1.7053	1.6475	1.5637	1.73	1.2382	1.8033	1.7897	1.8022
pos_1504	Tocopheronic acid	metab_1503	-	-	-	HMDB0030555	pos	-	-	-	-	Lipids and lipid-like molecules	Prenol lipids	277.143	M+H-H2O, M+Na	C16H22O5	5.3096	0.0524488	-	58.9	-1.10465	1948-76-1	Sesquiterpenoids	2.081	1.8163	2.2256	1.5443	1.9756	1.9054	1.6821	1.6621	1.7638	2.2842	1.5383	0.7509	1.8583	1.8853	1.841
pos_1508	Trihexosylceramide (d18:1/20:0)	metab_1507	-	-	C04737	HMDB0004881	pos	-	-	-	-	Lipids and lipid-like molecules	Sphingolipids	562.86	M+H+Na, M+2Na	C56H105NO18	5.2577	0.0593493	-	60.8	8.76568	-	Glycosphingolipids	2.1328	2.3782	2.1855	2.4508	2.442	2.2222	2.2725	2.253	2.0877	2.1226	2.3939	2.2479	2.3326	2.3418	2.2928
pos_1527	1-Octadecyl Lysophosphatidic Acid	metab_1526	-	-	-	-	pos	-	-	-	-	-	-	425.299	M+H, M+Na	C21H45O6P	4.9381	0.0503783	54.8	-	-8.14083	-	-	1.3138	1.5661	1.4736	1.6296	1.3769	1.5251	1.3767	1.4183	1.4662	1.4989	1.5444	1.4309	1.5302	1.5042	1.4884
pos_1583	Indoleacrylic acid	metab_1582	-	-	-	HMDB0000734	pos	-	-	-	-	Organoheterocyclic compounds	Indoles and derivatives	188.07	M+H, M+NH4	C11H9NO2	0.774	0.0446523	51.6	-	-4.69981	1204-06-4	Indoles	3.943	4.0666	4.1286	3.7125	3.9247	3.8867	3.8637	3.8964	4.0918	3.6484	3.4654	3.5286	3.7895	3.7783	3.8158
pos_1591	(R)-(+)-2-Pyrrolidone-5-carboxylic acid	metab_1590	map00471	D-Glutamine and D-glutamate metabolism	C02237	-	pos	-	-	Metabolism	Metabolism of other amino acids	-	-	130.049	M+H, 2M+H	C5H7NO3	0.9905	0.0287602	92.8	-	-4.1336	-	-	2.5008	2.5467	2.284	2.5223	2.4266	2.6317	2.5486	2.6502	2.5039	2.8621	2.6268	2.6088	2.6249	2.6495	2.6343
pos_1592	2-O-p-Coumaroyl-D-glucose	metab_1591	-	-	-	HMDB0039167	pos	-	-	-	-	Phenylpropanoids and polyketides	Cinnamic acids and derivatives	344.134	M+NH4, M+K	C15H18O8	1.0115	0.0160881	-	54.8	-0.0509385	110351-44-5	Hydroxycinnamic acids and derivatives	1.5184	1.6041	2.3361	1.608	2.377	1.5482	2.2958	1.3503	1.6555	1.3475	1.8394	2.0003	1.8782	1.8818	1.8915
pos_1599	L-Isoleucine	metab_1598	map01100;map04978;map00280;map00290;map01210;map02010;map01230;map04974;map00970;map05230	Metabolic pathways;Mineral absorption;Valine, leucine and isoleucine degradation;Valine, leucine and isoleucine biosynthesis;2-Oxocarboxylic acid metabolism;ABC transporters;Biosynthesis of amino acids;Protein digestion and absorption;Aminoacyl-tRNA biosynthesis;Central carbon metabolism in cancer	C00407	HMDB0000172	pos	Peptides	Amino acids	Metabolism;Organismal Systems;Metabolism;Metabolism;Metabolism;Environmental Information Processing;Metabolism;Organismal Systems;Genetic Information Processing;Human Diseases	Global and overview maps;Digestive system;Amino acid metabolism;Amino acid metabolism;Global and overview maps;Membrane transport;Global and overview maps;Digestive system;Translation;Cancers: Overview	Organic acids and derivatives	Carboxylic acids and derivatives	132.102	M+H, M+Na	C6H13NO2	1.2153	0.03261	84.8	-	-2.3949	73-32-5	Amino acids, peptides, and analogues	3.4497	3.3718	3.5164	3.5998	3.3716	3.437	3.6734	3.3988	3.606	3.2251	3.4332	3.6433	3.5044	3.5313	3.5108
pos_1605	(2-oxo-2,3-dihydro-1H-indol-3-yl)acetic acid	metab_1604	-	-	-	-	pos	-	-	-	-	-	-	209.091	M+H, M+NH4	C10H9NO3	0.754	0.00248326	52.4	-	-4.16966	-	-	2.7273	2.7458	2.7074	2.8809	2.7906	2.7365	2.8176	2.7598	2.6485	2.7712	2.6404	2.6219	2.7035	2.7025	2.7013
pos_1608	Indoleacetaldehyde	metab_1607	map01100;map00380	Metabolic pathways;Tryptophan metabolism	C00637	HMDB0001190	pos	-	-	Metabolism;Metabolism	Global and overview maps;Amino acid metabolism	Organoheterocyclic compounds	Indoles and derivatives	160.075	M+H, M+NH4	C10H9NO	1.484	0.0655805	56.7	-	-2.59086	2591-98-2	Indoles	3.7657	3.7507	3.3889	3.7113	3.8291	3.8129	3.7735	3.7974	3.7987	3.672	3.4659	3.8011	3.6998	3.707	3.7515
pos_1624	Acetylcarnitine	metab_1623	map04931	Insulin resistance	C02571	LMFA07070060	pos	-	-	Human Diseases	Endocrine and metabolic diseases	-	-	204.123	M+H, 2M+H	C9H17NO4	0.7335	0.0265631	53.2	-	-2.2756	-	-	3.7402	3.2923	3.517	3.1813	3.6605	3.6338	3.6223	3.3834	2.6164	2.1185	2.6841	3.6687	3.4824	3.4856	3.4641
pos_1632	(+)-Camphor	metab_1631	map04750	Inflammatory mediator regulation of TRP channels	C00808	LMPR0102120001	pos	-	-	Organismal Systems	Sensory system	-	-	153.127	M+H-H2O, M+H	C10H16O	2.4937	0.2998	73.4	-	-3.83289	-	-	2.9494	2.9255	3.019	2.9295	2.9353	2.9552	3.0297	3.0617	3.0704	3.052	2.9553	2.8917	2.9268	3.0107	2.7382
pos_1645	Isobutyryl carnitine	metab_1644	-	-	-	-	pos	-	-	-	-	-	-	232.154	M+H, M+2Na-H	C11H21NO4	2.7304	0.0336091	60.8	-	-2.68182	-	-	2.1319	1.8584	2.002	1.8612	2.4784	2.6946	2.0649	2.0718	1.6013	1.499	1.4781	2.2124	2.1405	2.1136	2.137
pos_1723	N-Decanoylglycine	metab_1722	-	-	-	HMDB0013267	pos	-	-	-	-	Organic acids and derivatives	Carboxylic acids and derivatives	230.175	M+H-H2O, M+H	C12H23NO3	3.0532	0.160177	-	52.6	-1.998	-	Amino acids, peptides, and analogues	2.7982	2.8786	2.9791	3.0984	2.8869	2.7555	2.9042	2.8828	2.8558	2.9488	2.9322	2.8792	2.9622	3.008	2.8675
pos_1854	Acetylcholine	metab_1853	map00564;map04810;map04972;map04970;map04971;map04976;map04024;map04080;map04911;map04725;map04742;map04721;map05033	Glycerophospholipid metabolism;Regulation of actin cytoskeleton;Pancreatic secretion;Salivary secretion;Gastric acid secretion;Bile secretion;cAMP signaling pathway;Neuroactive ligand-receptor interaction;Insulin secretion;Cholinergic synapse;Taste transduction;Synaptic vesicle cycle;Nicotine addiction	C01996	HMDB0000895	pos	Hormones and transmitters	Neurotransmitters	Metabolism;Cellular Processes;Organismal Systems;Organismal Systems;Organismal Systems;Organismal Systems;Environmental Information Processing;Environmental Information Processing;Organismal Systems;Organismal Systems;Organismal Systems;Organismal Systems;Human Diseases	Lipid metabolism;Cell motility;Digestive system;Digestive system;Digestive system;Digestive system;Signal transduction;Signaling molecules and interaction;Endocrine system;Nervous system;Sensory system;Nervous system;Substance dependence	Organic nitrogen compounds	Organonitrogen compounds	146.117	M+H	C7H15NO2	0.647	0.0796001	53.5	-	-4.16569	51-84-3	Quaternary ammonium salts	2.0014	1.911	1.8117	1.9507	2.0761	2.2604	1.3442	2.0323	2.0158	1.8264	1.6277	1.7401	1.8387	1.8586	1.7913
pos_1857	METHACHOLINE	metab_1856	-	-	C07471	HMDB0015654	pos	-	-	-	-	Organic nitrogen compounds	Organonitrogen compounds	160.133	M+H	C8H17NO2	0.6753	0.026223	59.4	-	-3.62549	55-92-5	Quaternary ammonium salts	2.7214	2.3148	2.1607	2.7633	2.442	2.9979	2.4752	2.8709	2.3794	2.6155	2.2714	2.7151	2.6427	2.6649	2.6499
pos_1858	5-Aminopentanoic acid	metab_1857	map00310;map00330	Lysine degradation;Arginine and proline metabolism	C00431	LMFA01100040;HMDB0003355	pos	-	-	Metabolism;Metabolism	Amino acid metabolism;Amino acid metabolism	Organic acids and derivatives	Carboxylic acids and derivatives	235.164	2M+H	C5H11NO2	0.6753	0.108408	-	89	-4.3059	660-88-8	Amino acids, peptides, and analogues	0.5632	0.8996	1.2668	1.0087	1.6086	0.5269	2.6128	1.1005	1.5646	1.4796	0.7655	0.9787	1.4956	1.5856	1.5314
pos_1861	Triethanolamine	metab_1860	map00564	Glycerophospholipid metabolism	C06771	HMDB0032538	pos	-	-	Metabolism	Lipid metabolism	Organic nitrogen compounds	Organonitrogen compounds	321.202	2M+Na	C6H15NO3	0.6853	0.0774557	-	56.8	7.32405	102-71-6	Amines	1.868	1.4896	1.5425	1.0206	2.2724	1.6116	2.6754	1.492	0.6243	0.193	0.2179	1.8118	1.9308	1.9531	1.8869
pos_1866	3,4,5-trihydroxy-6-[(4-hydroxy-3-methylbut-2-enoyl)oxy]oxane-2-carboxylic acid	metab_1865	-	-	-	HMDB0128929	pos	-	-	-	-	Organic oxygen compounds	Organooxygen compounds	310.114	M+NH4	C11H16O9	0.7138	0.125419	-	71.2	1.91956	-	Carbohydrates and carbohydrate conjugates	1.7858	1.6661	1.3208	1.4372	1.8452	1.8412	1.8689	1.7524	2.034	1.4578	1.708	1.8093	1.795	1.6947	1.7197
pos_1872	Indole	metab_1871	map01100;map00400;map00380;map04974	Metabolic pathways;Phenylalanine, tyrosine and tryptophan biosynthesis;Tryptophan metabolism;Protein digestion and absorption	C19907;C00463	HMDB0000738	pos	-	-	Metabolism;Metabolism;Metabolism;Organismal Systems	Global and overview maps;Amino acid metabolism;Amino acid metabolism;Digestive system	Organoheterocyclic compounds	Indoles and derivatives	118.064	M+H	C8H7N	0.7835	0.113738	82.5	-	-7.02637	120-72-9	Indoles	3.1642	3.2345	3.1542	3.062	3.1864	3.2095	3.1943	3.252	3.2505	3.056	2.9794	2.9888	3.0819	3.0612	3.1531
pos_1875	N-(1-Deoxy-1-fructosyl)phenylalanine	metab_1874	-	-	-	HMDB0037846	pos	-	-	-	-	Organic acids and derivatives	Carboxylic acids and derivatives	328.139	M+H	C15H21NO7	0.802	0.00957324	-	71.5	-0.990147	87251-83-0	Amino acids, peptides, and analogues	2.7309	2.7018	2.028	2.6732	3.0776	2.7667	3.243	2.7346	2.8085	2.5308	2.8319	3.0997	2.992	2.9913	2.9845
pos_1889	Diaminopimelic acid	metab_1888	map01100;map00300;map01230	Metabolic pathways;Lysine biosynthesis;Biosynthesis of amino acids	C00666	HMDB0001370	pos	-	-	Metabolism;Metabolism;Metabolism	Global and overview maps;Amino acid metabolism;Global and overview maps	Organic acids and derivatives	Carboxylic acids and derivatives	155.081	M+H-2H2O	C7H14N2O4	1.2153	0.211106	-	83.1	-3.91927	583-93-7	Amino acids, peptides, and analogues	0.7509	0.7051	0.9561	0.7057	1.0257	0.3612	0.5922	1.2453	0.9724	1.2794	1.7452	1.8283	1.3254	1.4336	1.2641
pos_1893	(±)-Propionylcarnitine	metab_1892	-	-	-	-	pos	-	-	-	-	-	-	218.138	M+H	C10H19NO4	1.2956	0.0652545	50.2	-	-3.17359	-	-	2.1139	1.7789	2.1192	0.0011	2.4669	2.6813	2.2154	2.0961	0.5436	0.0371	0.0009	2.3873	2.1505	2.1848	2.1295
pos_1896	3-Methylcyclohexanol	metab_1895	-	-	-	HMDB0031538	pos	-	-	-	-	Organic oxygen compounds	Organooxygen compounds	115.112	M+H	C7H14O	1.3259	0.292418	-	53.5	-2.0361	591-23-1	Alcohols and polyols	1.9289	1.8698	1.846	1.9216	1.8826	1.9168	1.9904	2.0105	2.0171	2.0836	1.9325	1.8471	1.8772	2.0026	1.7489
pos_1917	Glycylprolylhydroxyproline	metab_1916	-	-	-	HMDB0002171	pos	-	-	-	-	Organic acids and derivatives	Carboxylic acids and derivatives	268.129	M+H-H2O	C12H19N3O5	1.8411	0.118799	-	69.5	-1.92205	2239-67-0	Amino acids, peptides, and analogues	1.8929	1.9561	2.2483	1.9856	1.6746	1.7093	1.6225	2.1561	2.1886	1.5094	2.7477	2.6191	2.1492	2.1526	2.237
pos_1921	(+)-2,3-Dihydro-3-methyl-1H-pyrrole	metab_1920	-	-	-	HMDB0033529	pos	-	-	-	-	Organoheterocyclic compounds	Pyrrolines	84.0813	M+H	C5H9N	2.0991	0.140359	-	76.1	6.57026	-	Not Available	1.5809	1.5547	1.6599	1.5727	1.5343	1.6181	1.5886	1.6762	1.6428	1.6411	1.6242	1.4986	1.6239	1.5561	1.5067
pos_1928	Kynurenic acid	metab_1927	map01100;map00380	Metabolic pathways;Tryptophan metabolism	C01717	HMDB0000715	pos	-	-	Metabolism;Metabolism	Global and overview maps;Amino acid metabolism	Organoheterocyclic compounds	Quinolines and derivatives	190.049	M+H	C10H7NO3	2.2256	0.0734045	83.3	-	-3.7526	492-27-3	Quinoline carboxylic acids	2.4573	2.4612	2.1959	2.3133	2.5957	2.3941	3.1141	2.3685	2.3283	2.388	2.4859	2.2843	2.5643	2.5293	2.5931
pos_1939	Calamin	metab_1938	-	-	-	HMDB0038143	pos	-	-	-	-	Lipids and lipid-like molecules	Steroids and steroid derivatives	534.245	2M+3H2O+2H	C27H36O10	2.6897	0.0881563	-	52.4	4.98178	74751-40-9	Steroid lactones	1.4522	1.5569	1.2064	1.1543	1.3805	1.1656	1.4708	1.4822	1.6939	1.7995	1.5163	1.3346	1.5052	1.4863	1.4325
pos_1942	Furaneol 4-(6-malonylglucoside)	metab_1941	-	-	-	HMDB0029778	pos	-	-	-	-	Organic oxygen compounds	Organooxygen compounds	394.134	M+NH4	C15H20O11	2.7197	0.0485697	-	65.2	-0.0146285	-	Carbohydrates and carbohydrate conjugates	1.981	1.9941	2.0237	1.9784	1.9544	1.9904	2.0165	2.0312	2.0157	2.006	2.0012	1.9451	1.9559	1.9961	1.9675
pos_1958	5′-Deoxy-5′-<WBR>(methylthio)adenosine	metab_1957	-	-	-	-	pos	-	-	-	-	-	-	298.094	M+H	C11H15N5O3S	2.829	0.0942475	56.2	-	-8.81914	-	-	2.2535	2.3062	2.3305	2.419	2.5593	2.2521	2.4671	2.488	2.3334	2.5294	2.5177	2.5195	2.3613	2.4202	2.3439
pos_1990	Donhexocin	metab_1989	-	-	-	HMDB0033087	pos	-	-	-	-	Lipids and lipid-like molecules	Fatty Acyls	659.451	M+2Na-H	C35H66O8	2.9464	0.0607745	-	51.8	7.06508	-	Fatty alcohols	1.9967	2.1944	2.0263	2.1785	2.4416	2.1204	2.1344	2.3189	2.3478	1.9681	2.1576	2.0943	2.1897	2.2377	2.2341
pos_2049	N-Monodemethyl roxithromycin	metab_2048	-	-	-	HMDB0060845	pos	-	-	-	-	Organic oxygen compounds	Organooxygen compounds	405.254	M+2H	C39H72N2O15	3.3137	0.0380582	-	88.1	-0.172606	-	Carbohydrates and carbohydrate conjugates	1.8834	2.2943	2.3457	2.3707	2.3435	1.9606	1.9098	2.1062	2.2293	2.1004	2.3361	2.2318	2.1405	2.1439	2.1702
pos_2073	BW 245C	metab_2072	-	-	-	-	pos	-	-	-	-	-	-	369.238	M+H	C19H32N2O5	3.4653	0.205044	52.6	-	-1.12949	-	-	2.0548	2.3508	2.3307	2.4178	2.3432	2.2128	1.1349	2.3365	1.461	2.228	2.2837	1.4621	2.171	2.1716	2.3175
pos_2122	Putreanine	metab_2121	-	-	-	HMDB0006078	pos	-	-	-	-	Organic acids and derivatives	Carboxylic acids and derivatives	386.275	2M+ACN+Na	C7H17N2O2+	3.7238	0.196398	-	77.8	3.25548	25887-39-2	Amino acids, peptides, and analogues	2.6452	2.9125	2.7941	2.8546	2.7503	2.8314	3.1098	2.7694	2.9875	2.1882	2.5358	2.8526	2.7336	2.8522	2.6941
pos_2290	25-Hydroxyvitamin D2-25-glucuronide	metab_2289	-	-	-	HMDB0010342	pos	-	-	-	-	Lipids and lipid-like molecules	Steroids and steroid derivatives	606.405	M+NH4	C34H52O8	4.0681	0.150262	-	55	8.87377	-	Vitamin D and derivatives	2.2836	2.3017	2.2472	2.2844	2.3008	2.3709	2.4195	2.2674	2.3561	2.1589	2.125	2.2784	2.2827	2.3706	2.2476
pos_2308	Lumichrome	metab_2307	map00740	Riboflavin metabolism	C01727	-	pos	-	-	Metabolism	Metabolism of cofactors and vitamins	-	-	243.088	M+H	C12H10N4O2	4.1423	0.117057	68.7	-	2.32496	-	-	1.7016	1.6371	1.4332	1.3272	1.3789	1.7381	1.5995	1.959	1.6554	1.8447	1.2591	1.1619	1.4766	1.5727	1.5537
pos_2320	Mannosyl-inositol-phosphorylceramide	metab_2319	-	-	-	HMDB0012257	pos	-	-	-	-	Lipids and lipid-like molecules	Glycerophospholipids	558.875	M+2H	C56H110NO18P	4.1841	0.222758	-	50.5	-9.22629	-	Glycerophosphoethanolamines	1.1669	1.3027	1.3145	1.4545	1.3492	1.2292	1.3827	1.1584	1.5245	1.1407	1.4732	1.5487	1.4744	1.3965	1.5811
pos_2331	5-Hydroxyindoleacetic acid	metab_2330	map01100;map04726;map00380	Metabolic pathways;Serotonergic synapse;Tryptophan metabolism	C05635	HMDB0000763	pos	-	-	Metabolism;Organismal Systems;Metabolism	Global and overview maps;Nervous system;Amino acid metabolism	Organoheterocyclic compounds	Indoles and derivatives	192.065	M+H	C10H9NO3	4.2901	0.0651357	79.7	-	-3.19927	54-16-0	Indolyl carboxylic acids and derivatives	2.1514	2.1298	2.0704	2.1006	1.8822	2.1292	2.326	2.3829	2.2108	2.4737	2.1743	1.7633	2.2041	2.1572	2.2091
pos_2363	12-Hydroxydodecanoic acid	metab_2362	-	-	C08317	HMDB0002059	pos	-	-	-	-	Organic acids and derivatives	Hydroxy acids and derivatives	234.206	M+NH4	C12H24O3	4.5021	0.0988273	-	77.6	-0.800573	505-95-3	Medium-chain hydroxy acids and derivatives	1.6485	1.557	1.6579	1.3741	1.4179	1.5765	1.5192	1.652	1.5466	1.5932	1.4485	1.3722	1.544	1.4988	1.5825
pos_2365	N-Isobutyl-2,4,8,10,12-tetradecapentaenamide	metab_2364	-	-	-	LMFA08020195;HMDB0031184	pos	-	-	-	-	Lipids and lipid-like molecules	Fatty Acyls	291.243	M+NH4	C18H27NO	4.5121	0.0494298	-	51.1	-0.446309	78886-65-4	Fatty amides	1.6457	1.6061	1.7595	1.4542	0.8813	1.4748	1.3269	1.7513	1.7685	1.5485	1.4919	1.3962	1.5028	1.5016	1.5378
pos_2367	Sphingosine 1-phosphate (d16:1-P)	metab_2366	-	-	-	HMDB0060061	pos	-	-	-	-	Organic acids and derivatives	Organic phosphoric acids and derivatives	352.223	M+H	C16H34NO5P	4.5446	0.0430365	-	51.4	-5.04785	-	Phosphate esters	1.6123	1.7274	1.7581	1.9451	1.6426	1.6384	1.6368	1.7971	1.7119	1.686	1.7988	1.7834	1.7666	1.8021	1.777
pos_2390	3,4-dihydroxy-5-(3,4,5-trihydroxybenzoyloxy)benzoic acid	metab_2389	-	-	-	HMDB0128305	pos	-	-	-	-	Phenylpropanoids and polyketides	Depsides and depsidones	340.068	M+NH4	C14H10O9	5.0003	0.0286083	-	62.1	4.89106	-	Not Available	1.5414	1.4778	1.462	1.4145	1.4498	1.5375	1.5394	1.6106	1.6317	1.6198	1.4956	1.4092	1.5745	1.5595	1.5507
pos_2405	4,8 dimethylnonanoyl carnitine	metab_2404	-	-	-	LMFA07070046;HMDB0006202	pos	-	-	-	-	Lipids and lipid-like molecules	Fatty Acyls	330.264	M+H	C18H35NO4	5.0934	0.0990081	68.6	-	-0.261555	-	Fatty acid esters	1.6395	1.5125	1.5584	1.3492	0.9051	1.4787	1.4955	1.6785	1.7859	1.5114	1.4845	1.3276	1.4887	1.5402	1.4588
pos_2410	5,8-Epoxy-5,8-dihydro-10'-apo-b,y-carotene-3,10'-diol	metab_2409	-	-	-	HMDB0039020	pos	-	-	-	-	Lipids and lipid-like molecules	Prenol lipids	428.318	M+NH4	C27H38O3	5.1043	0.207734	-	60.8	4.32494	53905-15-0	Sesterterpenoids	3.088	3.196	3.1326	3.255	3.1877	3.1749	3.1597	3.184	3.2667	3.034	3.1164	3.0187	3.1593	3.1811	3.0038
pos_2421	Isoleucyl-Arginine	metab_2420	-	-	-	HMDB0028901	pos	-	-	-	-	Organic acids and derivatives	Carboxylic acids and derivatives	616.422	2M+ACN+H	C12H25N5O3	5.2376	0.159247	-	52.2	-6.43118	-	Amino acids, peptides, and analogues	1.5282	1.8213	1.5169	1.8328	1.708	1.6133	1.8033	1.674	1.9295	1.3504	1.7218	1.9072	1.7909	1.7465	1.6538
pos_2435	Norbolethone	metab_2434	-	-	D05204	HMDB0006026	pos	-	-	-	-	Lipids and lipid-like molecules	Steroids and steroid derivatives	317.247	M+H	C21H32O2	5.3721	0.052592	-	60.3	-0.56033	1235-15-0	Pregnane steroids	0.5685	1.4702	1.1947	1.6218	1.0245	0.48	1.3789	1.8629	1.2339	1.4456	1.5286	0.4959	1.3506	1.3787	1.3941
pos_2444	3-hydroxyhexanoyl carnitine	metab_2443	-	-	-	HMDB0061633	pos	-	-	-	-	Lipids and lipid-like molecules	Fatty Acyls	254.172	M+H-2H2O	C14H27NO5	5.4351	0.0534557	-	97.3	-9.3889	-	Fatty acid esters	1.6481	1.6104	1.5902	1.3821	1.4329	1.4908	1.5666	1.5633	1.4903	1.6404	1.4947	1.5203	1.5557	1.5672	1.5989
pos_2445	2-(2-Methylpropoxy)naphthalene	metab_2444	-	-	-	HMDB0035076	pos	-	-	-	-	Benzenoids	Naphthalenes	401.249	2M+H	C14H16O	5.4351	0.149329	-	55.7	4.87093	2173-57-1	Not Available	2.1578	2.2396	2.2292	2.2784	2.0943	2.1748	2.0547	2.0908	2.2128	2.0645	2.0501	2.0229	2.1541	2.1907	2.0616
pos_2446	Homodihydrocapsaicin	metab_2445	-	-	-	HMDB0036330	pos	-	-	-	-	Benzenoids	Phenols	339.264	M+NH4	C19H31NO3	5.4451	0.126156	-	87.3	-1.75961	20279-06-5	Methoxyphenols	1.5336	1.7096	1.2957	1.0267	1.535	1.2928	1.1412	1.4263	1.4879	1.3747	1.0355	1.469	1.3552	1.4087	1.3039
pos_2475	(9S,10E,12Z,15Z)-9-Hydroxy-10,12,15-octadecatrienoic acid	metab_2474	-	-	-	HMDB0031934	pos	-	-	-	-	Lipids and lipid-like molecules	Fatty Acyls	312.253	M+NH4	C18H30O3	5.7301	0.0519824	-	52.5	-0.257468	89886-42-0	Lineolic acids and derivatives	1.658	1.6187	1.6236	1.4085	1.1751	1.5252	1.5001	1.6858	1.7619	1.3867	1.4509	1.2387	1.551	1.5334	1.5072
pos_2480	Caribenolide I	metab_2479	-	-	C20007	-	pos	-	-	-	-	-	-	625.36	M+H	C33H52O11	5.7514	0.211119	55.9	-	3.51816	-	-	2.0489	1.521	1.5591	1.5984	1.9888	1.8133	1.5313	2.0347	1.6942	1.8294	1.4875	1.0385	1.7204	1.606	1.7897
pos_2520	Octadecanamide	metab_2519	-	-	C13846	HMDB0034146;LMFA08010003	pos	-	-	-	-	Organic acids and derivatives	Carboximidic acids and derivatives	347.306	M+ACN+Na	C18H37NO	5.9217	0.228871	-	63.8	8.58381	124-26-5	Carboximidic acids	1.4759	1.2347	1.7569	1.4142	0.8782	1.2174	1.2072	1.5149	1.5724	1.5374	1.4815	0.9616	1.4033	1.3738	1.214
pos_2539	3-hydroxydodecanoyl carnitine	metab_2538	-	-	-	HMDB0061638	pos	-	-	-	-	Lipids and lipid-like molecules	Fatty Acyls	342.263	M+H-H2O	C19H37NO5	6.0455	0.0634537	-	52.3	-2.13977	-	Fatty acid esters	1.7035	1.0704	1.7763	1.0837	2.356	2.2999	1.9419	1.2305	1.053	0.9722	1.0316	1.9873	1.8204	1.7781	1.83
pos_2557	2-Ethoxy-5-(1-propenyl)phenol	metab_2556	-	-	-	HMDB0040800	pos	-	-	-	-	Benzenoids	Phenol ethers	179.106	M+H	C11H14O2	6.1548	0.158729	57.4	-	-3.93048	94-86-0	Not Available	2.1208	1.9435	2.4173	2.3386	2.4241	2.3289	2.4945	2.2754	2.3475	2.1918	2.2835	2.7876	2.4491	2.316	2.4309
pos_2565	(±)-2,2,6-Trimethylcyclohexanone	metab_2564	-	-	-	HMDB0033794	pos	-	-	-	-	Organic oxygen compounds	Organooxygen compounds	158.154	M+NH4	C9H16O	6.1835	0.131794	-	88.8	-1.67767	62861-88-5	Carbonyl compounds	2.6938	2.592	2.9009	2.3784	2.289	2.4031	2.8697	2.8166	2.5339	2.4196	2.5747	2.4644	2.6073	2.5168	2.6283
pos_2572	Xestoaminol C	metab_2571	-	-	-	LMSP01080033	pos	-	-	-	-	-	-	230.247	M+H	C14H31NO	6.2025	0.00213812	73.3	-	-2.83915	-	-	3.7355	3.7371	3.6864	3.6579	3.5873	3.7563	3.7259	3.8233	3.7613	3.7106	3.6723	3.5197	3.7072	3.7073	3.7089
pos_2585	16-Hydroxy hexadecanoic acid	metab_2584	map01100	Metabolic pathways	C18218	HMDB0006294	pos	-	-	Metabolism	Global and overview maps	Lipids and lipid-like molecules	Fatty Acyls	290.269	M+NH4	C16H32O3	6.269	0.0582811	-	64.3	-0.612122	-	Fatty acids and conjugates	4.471	4.449	4.4782	4.2817	4.381	4.4584	4.3702	4.4545	4.439	4.4559	4.3437	4.3679	4.43	4.3814	4.4202
pos_2588	17-Hydroxylinolenic acid	metab_2587	map00592	alpha-Linolenic acid metabolism	C16346	HMDB0011108	pos	-	-	Metabolism	Lipid metabolism	Lipids and lipid-like molecules	Fatty Acyls	312.253	M+NH4	C18H30O3	6.2789	0.15697	-	69.3	-1.28511	-	Lineolic acids and derivatives	2.7236	2.7128	2.8261	2.5438	2.4969	2.7712	2.5937	2.8548	2.8074	2.5964	2.6222	2.5074	2.7091	2.745	2.6087
pos_2633	Avocadene	metab_2632	-	-	-	LMFA05000639;HMDB0031042	pos	-	-	-	-	Lipids and lipid-like molecules	Fatty Acyls	304.285	M+NH4	C17H34O3	6.4922	0.207904	-	52.7	0.199689	83797-45-9	Fatty alcohols	1.7676	1.479	1.8576	1.437	1.1736	1.8509	1.5918	1.665	1.7418	1.7198	1.5983	1.6663	1.8738	1.7774	1.6971
pos_2639	Desmosine	metab_2638	-	-	-	HMDB0000572	pos	-	-	-	-	Organic acids and derivatives	Carboxylic acids and derivatives	509.282	M+H-H2O	C24H40N5O8+	6.5023	0.127158	-	57	-4.87046	11003-57-9	Tetracarboxylic acids and derivatives	2.8348	0.0729	0.2856	0.0616	0.032	0.0684	0.1092	0.0605	0.0323	0.3043	0.6109	0.0792	1.7369	1.6912	1.7985
pos_2670	Germacrenone	metab_2669	-	-	-	HMDB0035887	pos	-	-	-	-	Lipids and lipid-like molecules	Prenol lipids	256.227	M+NH4	C15H26O2	6.5997	0.0310688	-	90.4	-2.22657	99957-12-7	Sesquiterpenoids	1.8535	1.5348	1.7407	1.3571	1.1724	1.3836	1.3779	1.5686	1.6316	1.5462	1.3549	1.4993	1.405	1.4301	1.4124
pos_2682	(3beta,17alpha,23S,24S)-17,23-Epoxy-3,24,29-trihydroxy-27-norlanost-8-en-15-one	metab_2681	-	-	-	HMDB0035144	pos	-	-	-	-	Lipids and lipid-like molecules	Prenol lipids	475.338	M+H	C29H46O5	6.6312	0.0379814	52.8	-	-8.59441	-	Triterpenoids	1.9229	2.2388	2.1664	2.2668	2.2312	2.2519	2.3978	2.2755	2.2642	2.2354	2.1499	2.0409	2.2679	2.2414	2.272
pos_2705	2,6,6-Trimethyl-1-cyclohexen-1-acetaldehyde	metab_2704	-	-	-	HMDB0032540	pos	-	-	-	-	Organic oxygen compounds	Organooxygen compounds	184.169	M+NH4	C11H18O	6.6742	0.178561	-	58.6	-0.561394	472-66-2	Carbonyl compounds	2.4042	2.3574	2.4801	2.2096	2.0172	2.2482	2.1495	2.4345	2.4224	2.4458	2.5878	2.4466	2.3794	2.2244	2.3416
pos_2708	Butyl salicylate	metab_2707	-	-	-	HMDB0040730	pos	-	-	-	-	Benzenoids	Benzene and substituted derivatives	195.101	M+H	C11H14O3	6.6853	0.0628306	57	-	-1.25089	2052-14-4	Benzoic acids and derivatives	3.1921	3.332	3.4389	3.3016	3.2268	3.2992	3.2644	3.3077	3.2741	3.3859	3.2588	3.3575	3.218	3.1636	3.1891
pos_2726	(-)-Carvomenthone	metab_2725	-	-	-	HMDB0034969	pos	-	-	-	-	Lipids and lipid-like molecules	Prenol lipids	172.169	M+NH4	C10H18O	6.7258	0.0680029	-	71.8	-1.91313	13163-73-0	Monoterpenoids	3.5916	3.5757	3.643	3.5324	3.3656	3.5389	3.4977	3.651	3.5853	3.6193	3.6132	3.5154	3.5187	3.5268	3.5726
pos_2727	3-O-Acetylepisamarcandin	metab_2726	-	-	-	HMDB0031958	pos	-	-	-	-	Phenylpropanoids and polyketides	Coumarins and derivatives	460.269	M+NH4	C26H34O6	6.7353	0.110102	-	50.6	-0.272366	61490-18-4	Not Available	3.4411	3.331	3.3771	3.3397	3.271	3.3819	3.416	3.4155	3.4854	3.4743	3.3161	3.2908	3.393	3.3478	3.4432
pos_2731	Moringyne	metab_2730	-	-	-	HMDB0031724	pos	-	-	-	-	Organic oxygen compounds	Organooxygen compounds	295.117	M+H-H2O	C15H20O7	6.745	0.22262	-	52.4	-1.12106	97400-73-2	Carbohydrates and carbohydrate conjugates	1.9418	1.9884	1.8575	1.8208	1.6865	2.0579	1.9932	2.2334	2.5	2.1532	2.1146	1.8525	1.8863	1.9441	1.7488
pos_2784	3alpha-Hydroxy-5beta-chola-7,9(11)-dien-24-oic Acid	metab_2783	-	-	-	LMST04010330	pos	-	-	-	-	-	-	373.274	M+H	C24H36O3	6.9153	0.0259354	60.7	-	-0.453866	-	-	3.0088	2.9897	2.7161	2.9002	3.064	3.0531	3.1745	2.7707	2.9775	2.7131	2.6172	2.6407	2.9108	2.9148	2.9318
pos_2788	3,7-Dimethyl-5-octene-1,7-diol 1-glucoside	metab_2787	-	-	-	HMDB0034771	pos	-	-	-	-	Lipids and lipid-like molecules	Fatty Acyls	398.215	M+ACN+Na	C16H30O7	6.9267	0.127419	-	55.7	0.299796	-	Fatty acyl glycosides	1.8685	1.669	1.5462	1.5397	1.5125	1.5571	1.7424	1.7868	1.7199	1.6766	1.7325	1.7619	1.7064	1.6441	1.7534
pos_2802	Avenoleic acid	metab_2801	-	-	-	HMDB0029978;LMFA02000054	pos	-	-	-	-	Lipids and lipid-like molecules	Fatty Acyls	314.269	M+NH4	C18H32O3	6.9482	0.0240787	-	83.3	-0.517487	177931-23-6	Lineolic acids and derivatives	2.7631	2.7134	2.7362	2.5457	2.4564	2.6724	2.6926	2.7393	2.84	2.5632	2.569	2.5224	2.6305	2.6433	2.6513
pos_2854	Tetracosahexaenoic acid	metab_2853	-	-	-	LMFA01030804;HMDB0002007	pos	-	-	-	-	Lipids and lipid-like molecules	Fatty Acyls	321.258	M+H-2H2O	C24H36O2	7.0591	0.26447	-	75.1	1.827	81247-23-6	Fatty acids and conjugates	2.0495	0.8751	1.9641	1.9076	2.2759	1.5442	2.1886	1.6517	1.8482	1.9294	1.2683	1.7201	1.7607	1.943	1.7552
pos_2863	D8'-Merulinic acid A	metab_2862	-	-	-	HMDB0041454	pos	-	-	-	-	Benzenoids	Benzene and substituted derivatives	408.311	M+NH4	C24H38O4	7.109	0.22135	-	54.3	-0.782701	69506-65-6	Benzoic acids and derivatives	2.5396	2.0982	2.2547	2.3954	2.7488	2.2704	2.7156	2.1998	2.3758	2.4223	2.0119	2.3542	2.4552	2.5071	2.3115
pos_2919	5-Hexyl-2-furanoctanoic acid	metab_2918	-	-	-	HMDB0112099	pos	-	-	-	-	Lipids and lipid-like molecules	Fatty Acyls	312.253	M+NH4	C18H30O3	7.2501	0.104182	-	62.1	-0.344971	-	Fatty acids and conjugates	1.8842	1.777	2.0137	1.6069	1.5559	1.7892	1.9992	1.9219	2.1246	1.5286	1.6678	1.7464	1.8195	1.7972	1.7318
pos_2977	Pfaffic acid	metab_2976	-	-	C08965	LMPR0106250001	pos	-	-	-	-	-	-	441.334	M+H	C29H44O3	7.3681	0.0887196	51.9	-	-5.50795	-	-	2.5797	2.3229	2.3402	2.468	2.6177	2.7002	2.6892	2.6801	2.5268	2.5652	2.3756	2.3439	2.4824	2.5424	2.5566
pos_3003	8,8-Diethoxy-2,6-dimethyl-2-octanol	metab_3002	-	-	-	HMDB0034557	pos	-	-	-	-	Organic oxygen compounds	Organooxygen compounds	288.253	M+ACN+H	C14H30O3	7.4323	0.236317	-	80.1	-1.04454	7779-94-4	Alcohols and polyols	1.5903	1.5551	1.087	1.2927	1.468	1.3969	1.4078	1.3988	1.3766	1.2255	0.7412	1.3139	1.3738	1.5774	1.4987
pos_3012	27-Norcholestanehexol	metab_3011	-	-	-	LMST04020029;HMDB0002157	pos	-	-	-	-	Lipids and lipid-like molecules	Steroids and steroid derivatives	477.32	M+Na	C26H46O6	7.4436	0.0599142	-	66.7	3.64418	91999-66-5	Bile acids, alcohols and derivatives	2.3967	2.4779	2.3751	2.4465	2.5706	2.4814	2.4776	2.4737	2.603	2.5293	2.5283	2.5558	2.4731	2.5248	2.506
pos_3033	Sphinganine	metab_3032	map00600;map01100;map04071	Sphingolipid metabolism;Metabolic pathways;Sphingolipid signaling pathway	C00836	LMSP01020001;HMDB0000269	pos	-	-	Metabolism;Metabolism;Environmental Information Processing	Lipid metabolism;Global and overview maps;Signal transduction	Organic nitrogen compounds	Organonitrogen compounds	302.305	M+H	C18H39NO2	7.4755	0.099039	80.9	-	0.419477	764-22-7	Amines	1.6657	1.4291	1.3866	1.6692	1.7852	1.8209	1.6752	2.19	2.6358	1.8046	1.663	2.2935	2.004	2.035	1.9496
pos_3095	15-deoxy-Δ12,14-Prostaglandin A2	metab_3094	-	-	-	-	pos	-	-	-	-	-	-	317.21	M+H	C20H28O3	7.5974	0.0385908	52.8	-	-2.49989	-	-	3.3221	1.6366	0.7144	1.4502	0.614	0.7431	2.8226	0.6088	2.1439	1.3789	2.7439	2.1112	2.4206	2.4523	2.4464
pos_3240	8(S)-HEPE	metab_3239	-	-	-	-	pos	-	-	-	-	-	-	301.216	M+H-H2O	C20H30O3	7.9253	0.146039	58.5	-	-2.0996	-	-	3.2034	1.1203	1.3489	1.4799	1.4005	1.449	2.2311	1.7303	1.4825	1.7988	2.3015	1.3295	2.2582	2.2202	2.341
pos_3272	24,25-Diacetylvulgaroside	metab_3271	-	-	-	HMDB0041366	pos	-	-	-	-	Lipids and lipid-like molecules	Prenol lipids	503.296	M+H-H2O	C29H44O8	8.0984	0.205008	-	64.7	-8.63654	172616-87-4	Sesterterpenoids	2.7391	2.6531	2.8298	2.7511	2.7591	2.783	2.9026	2.6981	2.6971	2.8395	2.7149	2.8857	2.7433	2.9002	2.7648
pos_3291	1-(7Z,10Z,13Z,16Z-docosatetraenoyl)-glycero-3-phosphate	metab_3290	-	-	-	HMDB0062310;LMGP10050020	pos	-	-	-	-	Lipids and lipid-like molecules	Glycerophospholipids	528.31	M+ACN+H	C25H43O7P	8.2107	0.192178	-	56.8	2.34147	-	Glycerophosphates	1.8807	1.6452	1.8442	1.5576	1.9645	2.0611	2.0608	2.0608	1.8204	2.2038	1.7081	2.0966	1.8581	1.8304	1.9794
pos_3313	1-(8Z,11Z,14Z-eicosatrienoyl)-sn-glycero-3-phosphocholine	metab_3312	-	-	-	-	pos	-	-	-	-	-	-	546.355	M+H	C28H52NO7P	8.3677	0.0204433	60	-	-0.117296	-	-	4.6429	4.5691	4.4943	4.0472	4.5622	4.6549	4.3578	4.6483	4.369	4.7474	4.4476	4.3636	4.5353	4.5348	4.5196
pos_3322	Dodecanol	metab_3321	-	-	C02277	HMDB0011626;LMFA05000001	pos	-	-	-	-	Lipids and lipid-like molecules	Fatty Acyls	228.232	M+ACN+H	C12H26O	8.4531	0.0421714	-	64.2	-1.62086	112-53-8	Fatty alcohols	4.148	4.0501	4.0325	4.056	3.9511	3.9893	4.0321	4.0869	4.1635	4.0809	4.1248	4.0948	4.0995	4.0755	4.1117
pos_3356	Linoleoyl glycine	metab_3355	-	-	-	-	pos	-	-	-	-	-	-	338.269	M+H	C20H35NO3	8.715	0.126257	52.6	-	-1.2024	-	-	2.5262	2.1206	1.8524	2.3086	2.1893	1.9252	1.9931	1.3834	2.1234	1.5478	2.2907	2.1616	2.1299	2.1235	2.0288
pos_3362	Docosatrienoic acid	metab_3361	-	-	-	HMDB0002823	pos	-	-	-	-	Lipids and lipid-like molecules	Fatty Acyls	352.321	M+NH4	C22H38O2	8.7711	0.0779828	-	64.3	0.595016	28845-86-5	Fatty acids and conjugates	3.1702	3.0473	3.0231	3.1016	3.1495	3.146	3.1652	3.0598	3.1524	3.0978	3.0435	2.884	3.1083	3.0739	3.1416
pos_3378	Humulenol I	metab_3377	-	-	-	HMDB0038211	pos	-	-	-	-	Lipids and lipid-like molecules	Prenol lipids	238.215	M+NH4	C15H24O	8.8652	0.294481	-	88.8	-7.59342	19888-01-8	Sesquiterpenoids	2.1685	2.6684	2.7879	2.5434	2.2903	2.6015	2.3293	2.63	2.4433	2.5677	2.5913	2.6243	2.414	2.541	2.6714
pos_3383	PE(17:0/0:0)	metab_3382	-	-	-	LMGP02050030	pos	-	-	-	-	-	-	468.309	M+H	C22H46NO7P	8.9124	0.0299274	83	-	0.170005	-	-	3.5316	3.5715	3.7435	3.3657	3.5878	3.7768	3.6204	3.4297	3.3621	3.5983	3.4164	3.5315	3.5472	3.565	3.5726
pos_3433	10,20-Dihydroxyeicosanoic acid	metab_3432	-	-	-	HMDB0031923	pos	-	-	-	-	Lipids and lipid-like molecules	Fatty Acyls	408.309	M+ACN+Na	C20H40O4	9.4287	0.144768	-	76.7	1.11725	120727-26-6	Fatty acids and conjugates	2.6105	2.4768	2.2152	2.4487	2.3679	2.562	2.5711	2.1823	2.1776	2.5172	2.418	2.4182	2.5571	2.4327	2.5282
pos_3456	Tridecanol	metab_3455	-	-	C14509	HMDB0013316	pos	-	-	-	-	Lipids and lipid-like molecules	Fatty Acyls	242.248	M+ACN+H	C13H28O	9.5408	0.262413	-	80.4	-0.669107	-	Fatty alcohols	2.545	2.2488	2.2677	2.35	2.2926	2.3106	2.2012	2.3047	2.2471	2.391	2.5251	2.5439	2.4284	2.2797	2.5143
pos_3553	Methyl linoleate	metab_3552	-	-	-	HMDB0034381	pos	-	-	-	-	Lipids and lipid-like molecules	Fatty Acyls	295.263	M+H	C19H34O2	9.8443	0.173475	73.9	-	-0.56587	112-63-0	Lineolic acids and derivatives	2.1456	2.5188	2.3029	0.7591	0.7291	2.257	1.3423	2.3073	2.5568	2.5399	1.7422	0.6983	2.212	2.3459	2.3532
pos_3557	3,4-Dimethyl-5-pentyl-2-furanpentadecanoic acid	metab_3556	-	-	-	HMDB0112081	pos	-	-	-	-	Lipids and lipid-like molecules	Fatty Acyls	424.376	M+NH4	C26H46O3	9.8633	0.0246469	-	57.9	-5.74702	116627-42-0	Fatty acids and conjugates	2.467	2.4224	2.3524	2.496	2.1184	2.4611	2.4396	2.4467	2.5152	2.4054	2.3864	2.355	2.4119	2.4317	2.4152
pos_3571	(5E)-1alpha-hydroxyvitamin D3	metab_3570	-	-	-	LMST03020233	pos	-	-	-	-	-	-	401.342	M+H	C27H44O2	9.893	0.141164	57.8	-	0.533859	-	-	2.9854	2.7685	2.829	2.808	2.822	2.9605	3.0403	2.9955	3.0164	2.7958	2.9962	3.2161	2.9195	3.0369	2.9566
pos_3572	PE(14:0/14:1(9Z))	metab_3571	-	-	-	HMDB0008822;LMGP02010407	pos	-	-	-	-	Lipids and lipid-like molecules	Glycerophospholipids	634.451	M+H	C33H64NO8P	9.893	0.242087	-	73	9.97918	-	Glycerophosphoethanolamines	1.7526	1.6419	1.4574	1.226	1.1535	1.2354	1.7091	1.7656	1.4523	1.6233	1.1344	1.1181	1.3406	1.5101	1.3479
pos_3583	2-Heptadecylfuran	metab_3582	-	-	-	HMDB0033608	pos	-	-	-	-	Organoheterocyclic compounds	Heteroaromatic compounds	324.326	M+NH4	C21H38O	9.9342	0.0543084	-	63.7	0.316659	208329-97-9	Not Available	2.3774	2.0921	1.7146	2.2615	1.5565	2.3817	2.5358	2.0753	2.059	2.4609	2.6009	2.4937	2.4887	2.4559	2.5021
pos_3640	Calamusenone	metab_3639	-	-	-	HMDB0038200	pos	-	-	-	-	Lipids and lipid-like molecules	Prenol lipids	219.174	M+H	C15H22O	10.04	0.197083	51.5	-	-1.6927	71305-96-9	Sesquiterpenoids	3.3195	3.1933	3.2129	3.2419	3.3003	3.0757	3.3475	3.2367	3.2841	3.2051	3.2534	3.1975	3.1704	3.2483	3.0749
pos_3643	Cyclopassifloic acid D	metab_3642	-	-	-	HMDB0035948	pos	-	-	-	-	Lipids and lipid-like molecules	Steroids and steroid derivatives	505.354	M+H	C30H48O6	10.0601	0.16247	-	56.3	2.29941	292167-37-4	Cycloartanols and derivatives	2.5223	2.4519	2.4287	2.5018	1.49	2.5426	2.5856	2.5707	2.527	2.4158	2.5179	2.1613	2.433	2.5131	2.3742
pos_3651	Farnesylcysteine	metab_3650	map00900	Terpenoid backbone biosynthesis	C19691	HMDB0011627	pos	-	-	Metabolism	Metabolism of terpenoids and polyketides	Lipids and lipid-like molecules	Prenol lipids	668.454	2M+NH4	C18H31NO2S	10.081	0.0428308	-	53.3	7.75291	68000-92-0	Sesquiterpenoids	2.1124	2.0556	1.839	1.7908	0.2851	1.7192	1.7525	1.9411	2.0861	1.8075	1.7089	1.4828	1.7428	1.7125	1.746
pos_3663	Xi-2,3-Dihydro-3-methylfuran	metab_3662	-	-	-	HMDB0037788	pos	-	-	-	-	Organoheterocyclic compounds	Dihydrofurans	102.091	M+NH4	C5H8O	10.1013	0.0477148	-	76.4	-2.7453	-	Not Available	2.7461	2.6933	2.9973	2.8646	2.9838	2.8117	2.7617	2.5488	2.6069	2.6594	2.7959	2.9514	2.752	2.7641	2.792
pos_3691	(-)-alpha-Narcotine	metab_3690	-	-	C09592	HMDB0033439	pos	-	-	-	-	Alkaloids and derivatives	Phthalide isoquinolines	431.179	M+NH4	C22H23NO7	10.1787	0.16307	-	54.4	-5.85739	128-62-1	Not Available	3.2498	3.2252	3.1082	3.0847	2.9088	3.0505	3.0823	3.175	3.2696	3.1308	3.1885	3.1398	3.0621	3.1463	3.2055
pos_3695	1-Palmitoylglycerophosphoinositol	metab_3694	-	-	-	HMDB0061695	pos	-	-	-	-	Lipids and lipid-like molecules	Glycerophospholipids	555.293	M+H-H2O	C25H49O12P	10.2261	0.214464	-	61.6	0.45886	-	Glycerophosphoinositols	2.2818	2.5027	2.4775	2.1151	1.866	2.4656	1.874	2.3725	2.368	2.4072	1.9972	1.2685	2.1577	2.2337	2.34
pos_3699	PC(18:0/20:4(5Z,8Z,10E,14Z)(12OH[S]))	metab_3698	-	-	-	LMGP20010001	pos	-	-	-	-	-	-	826.594	M+H	C46H84NO9P	10.236	0.246276	71.3	-	-1.7324	-	-	2.2017	2.2058	2.6078	2.2779	2.8219	2.3021	2.3998	2.5293	2.2548	2.7424	2.2245	2.3539	2.0647	2.2729	2.2583
pos_3708	N,N-Dimethylaniline	metab_3707	-	-	C02846	HMDB0001020	pos	-	-	-	-	Organic nitrogen compounds	Organonitrogen compounds	122.097	M+H	C8H11N	10.256	0.171344	69.2	-	0.837746	121-69-7	Amines	2.3986	2.399	2.4108	2.4903	2.6831	2.5138	2.494	2.4708	2.4001	2.3006	2.3648	2.4449	2.4856	2.5486	2.3983
pos_3732	Beta-Tocopheryl quinone	metab_3731	-	-	-	HMDB0035194	pos	-	-	-	-	Lipids and lipid-like molecules	Prenol lipids	465.391	M+CH3OH+H	C28H48O3	10.3766	0.088006	-	69.1	-5.74924	3361-08-08	Diterpenoids	1.148	0.8762	0.9114	0.7885	0.4638	0.88	0.6251	1.3629	0.4657	0.8151	2.3743	2.1374	1.7737	1.83	1.7607
pos_3782	PE(16:0/20:4(8Z,11Z,14Z,17Z))	metab_3781	-	-	-	HMDB0008938	pos	-	-	-	-	Lipids and lipid-like molecules	Glycerophospholipids	740.524	M+H	C41H74NO8P	11.1431	0.069827	-	50.3	2.16234	-	Glycerophosphoethanolamines	3.3274	3.171	2.1613	3.0335	2.0548	3.2363	3.4268	3.0606	2.7713	3.3589	3.1682	3.2319	3.2142	3.1783	3.1544
pos_3787	1-Palmitoyl-2-linoleoyl PE	metab_3786	-	-	-	-	pos	-	-	-	-	-	-	716.523	M+H	C39H74NO8P	11.2864	0.070234	87.7	-	0.784945	-	-	3.7097	3.592	3.0089	3.2968	3.4479	3.6353	3.7806	3.5767	3.4677	3.9318	3.5439	3.5356	3.5641	3.5088	3.5164
pos_3800	2,6-Diethylaniline	metab_3799	-	-	C11001	HMDB0032782	pos	-	-	-	-	Benzenoids	Benzene and substituted derivatives	150.128	M+H	C10H15N	11.4827	0.119053	-	52.8	1.40818	579-66-8	Aniline and substituted anilines	2.3355	2.4049	1.9398	1.9776	2.0855	2.069	2.19	2.5158	2.4849	2.1941	2.2784	2.3635	2.2048	2.2196	2.2979
pos_3815	Semi-beta-carotenone	metab_3814	-	-	-	HMDB0039017	pos	-	-	-	-	Lipids and lipid-like molecules	Prenol lipids	607.393	M+K	C40H56O2	11.8205	0.114721	-	65.1	3.03862	20126-73-2	Sesquaterpenoids	3.1159	3.1555	2.9287	2.8651	2.6197	2.841	2.5666	3.0922	2.9024	2.6806	2.9476	2.6851	2.9014	3.0003	2.9456
pos_3816	PE(14:0/18:1(9Z))	metab_3815	-	-	-	LMGP02011247;HMDB0008828	pos	-	-	-	-	Lipids and lipid-like molecules	Glycerophospholipids	722.529	M+CH3OH+H	C37H72NO8P	11.8205	0.138916	-	75	-6.56262	-	Glycerophosphoethanolamines	2.6095	2.5303	2.2283	2.5173	2.2283	2.7237	2.4238	2.5963	2.7647	2.1423	2.6445	2.6264	2.8134	2.7537	2.6926
pos_3824	PC(16:1(9Z)/22:2(13Z,16Z))	metab_3823	-	-	-	HMDB0008020;LMGP01011496	pos	-	-	-	-	Lipids and lipid-like molecules	Glycerophospholipids	850.57	M+K	C46H86NO8P	12.0279	0.209271	-	60.9	-2.51474	-	Glycerophosphocholines	1.6384	1.5891	1.151	1.2181	0.857	1.4681	1.3313	1.5292	1.064	2.027	1.6979	1.209	1.539	1.4047	1.5832
pos_3836	(3R,3'R,6'R,9-cis)-beta,epsilon-Carotene-3,3'-diol	metab_3835	-	-	-	HMDB0002198	pos	-	-	-	-	Lipids and lipid-like molecules	Prenol lipids	586.467	M+NH4	C40H56O2	12.2779	0.106764	-	81.7	8.29524	29414-89-9	Tetraterpenoids	1.5919	1.5894	1.5109	1.5361	1.4954	1.5393	1.5437	1.6236	1.5785	1.4912	1.3695	1.2726	1.5655	1.5732	1.489
pos_3846	2,4-Dimethylpyridine	metab_3845	-	-	-	HMDB0032244	pos	-	-	-	-	Organoheterocyclic compounds	Pyridines and derivatives	108.081	M+H	C7H9N	12.488	0.0299472	-	85.5	-0.740139	108-47-4	Methylpyridines	1.8373	1.8939	1.9568	1.9688	1.9599	1.9309	1.8901	1.9749	1.9276	1.9747	1.7773	1.8794	1.9289	1.9364	1.9112
pos_4020	Dihydrocarvone	metab_4019	-	-	C18018	HMDB0036079	pos	-	-	-	-	Lipids and lipid-like molecules	Prenol lipids	153.127	M+H	C10H16O	15.9351	0.26008	80.7	-	-2.45584	7764-50-3	Monoterpenoids	3.1396	3.1172	3.1582	3.1339	3.159	3.1627	3.2055	3.2259	3.2434	3.1677	3.0692	3.0204	3.1203	3.1917	2.9579
pos_4244	2,5-Dibutyl-4-methyloxazole	metab_4243	-	-	-	HMDB0037898	pos	-	-	-	-	Organoheterocyclic compounds	Azoles	178.159	M+H-H2O	C12H21NO	12.741	0.0396518	-	88.2	-2.09787	88300-08-7	Oxazoles	2.2733	2.2323	2.3354	2.2634	2.3002	2.3123	2.2933	2.3601	2.3503	2.3003	2.2347	2.2669	2.3078	2.2822	2.2757
pos_4246	2,6-Dimethylpyridine	metab_4245	-	-	-	HMDB0032972	pos	-	-	-	-	Organoheterocyclic compounds	Pyridines and derivatives	108.081	M+H	C7H9N	12.6983	0.0267975	58.4	-	-1.17102	108-48-5	Methylpyridines	2.4318	2.4124	2.4334	2.4151	2.4461	2.4485	2.4476	2.5059	2.4536	2.4644	2.4042	2.414	2.4492	2.4392	2.4623
pos_4259	Glycinexylidide	metab_4258	map00982	Drug metabolism - cytochrome P450	C16569	HMDB0060679	pos	-	-	Metabolism	Xenobiotics biodegradation and metabolism	Benzenoids	Benzene and substituted derivatives	161.107	M+H-H2O	C10H14N2O	12.488	0.0540311	-	72.6	-3.42326	-	Xylenes	2.1063	2.0701	2.1959	2.0876	2.0688	2.1077	2.0699	2.101	2.1208	2.105	2.0538	2.0664	2.1079	2.1157	2.1511
pos_4266	LysoPE(0:0/16:1(9Z))	metab_4265	-	-	-	HMDB0011474;LMGP02050037	pos	-	-	-	-	Lipids and lipid-like molecules	Glycerophospholipids	416.253	M+H-2H2O	C21H42NO7P	12.4037	0.272208	-	59.4	-7.36699	-	Glycerophosphoethanolamines	1.1547	1.5108	1.5129	1.3797	1.6739	1.5691	1.3869	1.5107	1.5183	1.3701	1.5868	1.5096	1.332	1.5289	1.5643
pos_4268	5,6-Dimethylbenzimidazole	metab_4267	map01100;map00860;map00740	Metabolic pathways;Porphyrin and chlorophyll metabolism;Riboflavin metabolism	C03114	-	pos	-	-	Metabolism;Metabolism;Metabolism	Global and overview maps;Metabolism of cofactors and vitamins;Metabolism of cofactors and vitamins	-	-	147.091	M+H	C9H10N2	12.3825	0.0960467	62	-	-2.60163	-	-	3.3246	3.2862	3.2629	3.2712	3.2942	3.2822	3.302	3.3302	3.3144	3.3823	3.3146	3.3445	3.3321	3.3118	3.3907
pos_4315	PE(15:0/16:1(9Z))	metab_4314	-	-	-	HMDB0008891;LMGP02011235	pos	-	-	-	-	Lipids and lipid-like molecules	Glycerophospholipids	708.514	M+CH3OH+H	C36H70NO8P	11.8205	0.159952	-	76.3	-5.69901	-	Glycerophosphoethanolamines	3.5732	3.563	3.6269	3.5425	3.4999	3.6801	3.5246	3.606	3.6423	3.5736	3.5519	3.3777	3.6872	3.6872	3.5602
pos_4382	PC(16:0/22:6(4Z,7Z,10Z,13Z,16Z,19Z))	metab_4381	-	-	-	HMDB0007991;LMGP01012137	pos	-	-	-	-	Lipids and lipid-like molecules	Glycerophospholipids	828.551	M+Na	C46H80NO8P	10.8238	0.149386	-	50.7	0.0911946	-	Glycerophosphocholines	2.453	2.2841	1.7969	2.5575	1.7969	2.5342	2.2933	2.2576	2.0603	2.0062	2.3924	2.9899	2.5166	2.3924	2.5017
pos_4405	13'-Hydroxy-alpha-tocopherol	metab_4404	-	-	-	HMDB0012559	pos	-	-	-	-	Lipids and lipid-like molecules	Prenol lipids	429.373	M+H-H2O	C29H50O3	10.6011	0.0261532	-	53.8	0.0464693	-	Quinone and hydroquinone lipids	3.1898	3.246	3.536	2.9815	3.1409	3.1057	3.1616	3.269	3.0704	3.2302	3.7481	3.4795	3.3586	3.3441	3.3363
pos_4416	PS(16:0/18:0)	metab_4415	-	-	-	LMGP03010906;HMDB0012356	pos	-	-	-	-	Lipids and lipid-like molecules	Glycerophospholipids	728.524	M+H-2H2O	C40H78NO10P	10.5336	0.0799785	-	51.6	1.93841	-	Glycerophosphoserines	2.2974	1.9219	1.8026	1.9722	1.8026	2.2358	2.3134	2.191	2.0817	2.2962	2.3276	2.2505	2.1658	2.2233	2.2303
pos_4520	PE(14:0/15:0)	metab_4519	-	-	-	HMDB0008823;LMGP02011250	pos	-	-	-	-	Lipids and lipid-like molecules	Glycerophospholipids	632.465	M+H-H2O	C34H68NO8P	10.1633	0.0937658	-	52.4	0.439735	-	Glycerophosphoethanolamines	2.7902	2.4491	2.5706	2.3106	2.5778	2.6655	2.4705	2.6115	2.3759	2.7887	2.584	2.0466	2.4784	2.5576	2.5066
pos_4589	3-Methoxymorphinan	metab_4588	-	-	-	HMDB0014045	pos	-	-	-	-	Alkaloids and derivatives	Morphinans	532.392	2M+NH4	C17H23NO	10.0186	0.20569	-	96.1	3.83808	1531-25-5	Not Available	1.5416	1.2542	1.6616	1.4672	1.0365	1.6282	1.7202	1.6405	1.6802	1.4995	1.0691	1.2823	1.6203	1.5689	1.4436
pos_4630	3-(Acetyloxy)-2-hydroxypropyl icosanoate	metab_4629	-	-	-	HMDB0059928	pos	-	-	-	-	Lipids and lipid-like molecules	Glycerolipids	473.318	M+2Na-H	C25H48O5	9.9651	0.0402311	-	59.2	-7.31188	-	Diradylglycerols	2.3669	2.2522	2.3665	2.295	2.2573	2.2985	2.2945	2.3911	2.4016	2.2894	2.4356	2.4317	2.3295	2.3609	2.333
pos_4691	Alpha-Tocopherolquinone	metab_4690	-	-	-	HMDB0034408	pos	-	-	-	-	Lipids and lipid-like molecules	Prenol lipids	447.384	M+H	C29H50O3	9.8443	0.157086	50.3	-	1.01948	7559-04-08	Diterpenoids	1.3528	1.0169	2.2182	0.5586	0.1965	0.9869	0.5411	1.9762	0.1976	0.9181	2.6856	1.6932	1.7755	1.6963	1.832
pos_4700	Tetradecanol	metab_4699	-	-	-	HMDB0011638	pos	-	-	-	-	Lipids and lipid-like molecules	Fatty Acyls	256.263	M+ACN+H	C14H30O	9.8068	0.128174	-	70.9	-1.48857	112-72-1	Fatty alcohols	3.6408	3.4476	3.3288	3.5001	3.4444	3.3997	3.3634	3.5403	3.4146	3.504	3.7447	3.6501	3.493	3.5528	3.605
pos_4723	Paricalcitol	metab_4722	-	-	C08127	LMST04030163;HMDB0015046	pos	-	-	-	-	Lipids and lipid-like molecules	Steroids and steroid derivatives	449.363	M+CH3OH+H	C27H44O3	9.7323	0.11935	-	52.8	0.299865	131918-61-1	Vitamin D and derivatives	1.1915	1.1587	2.221	0.8909	1.4969	0.831	0.8138	1.9001	0.9843	0.7858	2.585	1.8389	1.7198	1.7343	1.8119
pos_4792	Stearoylethanolamide	metab_4791	-	-	-	HMDB0013078	pos	-	-	-	-	Organic nitrogen compounds	Organonitrogen compounds	328.321	M+H	C20H41NO2	9.5797	0.0785479	50.7	-	0.901767	111-57-9	Amines	2.5992	2.5728	2.4593	2.496	2.6372	2.4557	2.7257	2.5334	2.7705	2.533	2.705	2.5386	2.6259	2.5671	2.5694
pos_4823	3a,7a-Dihydroxycoprostanic acid	metab_4822	-	-	-	-	pos	-	-	-	-	-	-	435.347	M+H	C27H46O4	9.5028	0.010979	51.3	-	0.118592	-	-	1.4579	1.5981	1.8619	1.3587	1.8209	1.3687	1.8704	1.8745	1.3586	1.426	2.8003	2.7572	2.3045	2.3001	2.3096
pos_4832	2-Pentadecylfuran	metab_4831	-	-	-	HMDB0033609	pos	-	-	-	-	Organoheterocyclic compounds	Heteroaromatic compounds	296.295	M+NH4	C19H34O	9.4657	0.0444562	-	55.6	-0.0186992	59958-20-2	Not Available	4.1825	4.036	3.9515	4.1893	4.2367	4.2121	4.2947	4.1235	4.1004	4.3172	4.319	4.3278	4.2708	4.251	4.2897
pos_4836	3-?Methyl-?5-?pentyl-2-?furantridecanoic acid	metab_4835	-	-	-	HMDB0061648	pos	-	-	-	-	Lipids and lipid-like molecules	Fatty Acyls	406.33	M+ACN+H	C23H40O3	9.4472	0.184192	-	61	-4.96847	57818-42-5	Fatty acids and conjugates	1.7718	2.0259	2.4361	2.402	2.2085	2.0568	2.3811	2.2571	2.3286	2.2613	1.8721	2.0561	2.0233	2.1847	2.1217
pos_4890	Palmitic amide	metab_4889	-	-	-	HMDB0012273	pos	-	-	-	-	Lipids and lipid-like molecules	Fatty Acyls	511.52	2M+H	C16H33NO	9.1279	0.0395226	-	73.2	1.29124	629-54-9	Fatty amides	4.6624	4.4197	4.2567	4.5251	4.5333	4.4882	4.596	4.4792	4.5161	4.5829	4.6781	4.5408	4.6157	4.5837	4.6115
pos_4901	Physapruin B	metab_4900	-	-	-	HMDB0040671	pos	-	-	-	-	Organoheterocyclic compounds	Benzopyrans	644.377	M+ACN+H	C34H50O9	9.0627	0.0725061	-	63.8	-3.73775	-	1-benzopyrans	2.2551	1.6695	2.1559	2.318	2.6705	2.2967	2.8338	1.5833	1.5448	2.0912	2.4166	2.6565	2.441	2.4025	2.3794
pos_4913	Retinol	metab_4912	map01100;map00830;map04977	Metabolic pathways;Retinol metabolism;Vitamin digestion and absorption	C00473;C19962	LMPR01090001	pos	Vitamins and Cofactors;-	Vitamins;-	Metabolism;Metabolism;Organismal Systems	Global and overview maps;Metabolism of cofactors and vitamins;Digestive system	-	-	269.226	M+H-H2O	C20H30O	9.0532	0.124752	63.2	-	-0.956629	-	-	3.3416	3.1914	3.1898	3.2214	3.2884	3.3388	3.2156	3.4116	3.1497	3.4764	3.2045	3.2697	3.291	3.1966	3.2972
pos_4914	7,10,13-Eicosatriynoic acid	metab_4913	-	-	-	LMFA01030698	pos	-	-	-	-	-	-	301.216	M+H	C20H28O2	9.0155	0.234823	61.2	-	-1.03801	-	-	3.0317	1.2716	1.2396	1.6672	1.0133	0.829	1.5083	0.7968	0.7064	2.2226	2.1123	1.555	1.7262	1.6792	1.8647
pos_4922	11,12-DiHETrE	metab_4921	map00590;map01100;map04726	Arachidonic acid metabolism;Metabolic pathways;Serotonergic synapse	C14774	HMDB0002314	pos	-	-	Metabolism;Metabolism;Organismal Systems	Lipid metabolism;Global and overview maps;Nervous system	Lipids and lipid-like molecules	Fatty Acyls	380.277	M+ACN+H	C20H34O4	9.0062	0.0434949	-	67	-6.72051	192461-95-3	Eicosanoids	3.1611	3.071	2.8776	3.0904	3.0672	2.9481	3.2597	3.0189	2.9707	2.9187	3.1694	3.1389	3.0863	3.0993	3.0619
pos_4936	(Z)-9-Cycloheptadecen-1-one	metab_4935	-	-	-	HMDB0031336	pos	-	-	-	-	Organic oxygen compounds	Organooxygen compounds	268.263	M+NH4	C17H30O	8.9405	0.0447433	-	60.3	-1.30092	542-46-1	Carbonyl compounds	3.6073	3.6077	3.6331	3.5862	3.5488	3.5862	3.6118	3.6415	3.6506	3.6242	3.6199	3.5966	3.6281	3.5917	3.5992
pos_4942	PC(19:1(9Z)/0:0)	metab_4941	-	-	-	LMGP01050130	pos	-	-	-	-	-	-	536.371	M+H	C27H54NO7P	8.9029	0.0408126	50.1	-	-0.144434	-	-	3.7532	3.6423	3.6447	3.179	3.7303	3.7852	3.6233	3.8224	3.5456	3.8701	3.6068	3.4232	3.6228	3.6458	3.6579
pos_4943	Quinceoxepine	metab_4942	-	-	-	HMDB0038107	pos	-	-	-	-	Organic oxygen compounds	Organooxygen compounds	196.168	M+NH4	C12H18O	8.9029	0.230128	-	72.7	-8.21915	132925-10-1	Ethers	2.4158	2.3521	2.3957	2.1105	1.919	1.8573	2.0907	2.3162	2.6219	2.1429	2.2228	2.2211	2.0794	2.2618	2.2706
pos_4946	(E)-5,8-Megastigmadien-4-one	metab_4945	-	-	-	HMDB0034671	pos	-	-	-	-	Organic oxygen compounds	Organooxygen compounds	210.185	M+NH4	C13H20O	8.8935	0.208146	-	70.4	-1.08183	67401-26-7	Carbonyl compounds	3.0974	3.0805	2.8905	2.9802	2.7688	2.7668	2.7342	2.926	2.9532	3.1136	2.7124	2.7768	2.8073	2.9327	2.7654
pos_4953	Cis-Quinceoxepane	metab_4952	-	-	-	HMDB0038108	pos	-	-	-	-	Organoheterocyclic compounds	Oxepanes	198.184	M+NH4	C12H20O	8.8559	0.207627	-	64.2	-4.27915	133005-51-3	Not Available	3.2947	3.1437	3.2151	3.1438	3.2199	3.2345	3.2683	3.2828	3.346	3.1557	3.2657	3.2414	3.2407	3.229	3.3833
pos_4961	Ganglioside GD3 (d18:1/26:0)	metab_4960	-	-	C06133	HMDB0004919	pos	-	-	-	-	Lipids and lipid-like molecules	Sphingolipids	792.995	M+2H	C78H141N3O29	8.8182	0.0651555	-	53.8	6.10046	-	Glycosphingolipids	1.4892	1.815	2.0385	1.2239	2.0433	1.6542	1.5855	1.1038	1.5003	1.7432	1.0886	1.3722	1.5264	1.5725	1.525
pos_4996	8(R)-HETE	metab_4995	map00590	Arachidonic acid metabolism	C14824	-	pos	-	-	Metabolism	Lipid metabolism	-	-	303.232	M+H-H2O	C20H32O3	8.6682	0.1592	52.2	-	-0.936789	-	-	1.569	1.9912	2.1736	1.6847	1.8697	1.9279	1.9038	1.8472	1.6193	2.0213	1.8658	1.9585	1.9527	1.8628	1.8225
pos_5034	Humulol	metab_5033	-	-	-	HMDB0038213	pos	-	-	-	-	Lipids and lipid-like molecules	Prenol lipids	240.232	M+NH4	C15H26O	8.5089	0.141813	-	79.6	-1.66113	24405-58-1	Sesquiterpenoids	3.2975	3.1824	3.2989	3.1455	2.7619	3.0028	3.0053	3.228	3.4147	3.1366	3.1734	3.1414	3.1526	3.2238	3.1024
pos_5040	LysoPC(16:1(9Z)/0:0)	metab_5039	map00564;map05231	Glycerophospholipid metabolism;Choline metabolism in cancer	C04230	HMDB0010383	pos	Lipids	Phospholipids	Metabolism;Human Diseases	Lipid metabolism;Cancers: Overview	Lipids and lipid-like molecules	Glycerophospholipids	507.327	2M+3H2O+2H	C24H48NO7P	8.4531	0.278286	-	58.7	-3.54697	76790-27-7	Glycerophosphocholines	1.578	1.5891	1.7741	1.8487	1.7655	1.551	1.5155	1.7592	1.7632	1.4054	1.577	1.6966	1.7622	1.5946	1.8413
pos_5047	Ganoderic acid alpha	metab_5046	-	-	-	HMDB0033024	pos	-	-	-	-	Lipids and lipid-like molecules	Prenol lipids	616.346	M+ACN+H	C32H46O9	8.4339	0.197248	-	56.5	-3.69163	220181-81-7	Triterpenoids	1.6573	1.2131	1.7508	1.2267	2.2368	1.1845	2.3666	1.1621	1.1953	1.3556	1.7808	2.0587	1.7612	1.9104	1.7817
pos_5070	9-Oxo-nonanoic acid	metab_5069	-	-	-	LMFA01060160;HMDB0094711	pos	-	-	-	-	Lipids and lipid-like molecules	Fatty Acyls	155.106	M+H-H2O	C9H16O3	8.3866	0.176201	-	63.3	-2.05633	-	Fatty acids and conjugates	2.4755	2.4794	2.5771	2.5594	2.4777	2.3267	2.2654	2.3008	2.3291	2.3542	2.6742	2.424	2.2929	2.3362	2.4375
pos_5103	1alpha,25-dihydroxy-11alpha-[(1R)-oxiranyl]vitamin D3	metab_5102	-	-	-	LMST03020411	pos	-	-	-	-	-	-	459.347	M+H	C29H46O4	8.2866	0.0984357	57.4	-	0.98621	-	-	2.5664	2.5822	2.8487	2.6889	2.7697	2.6285	3.4371	3.0105	2.6268	2.539	2.4507	1.8243	2.8298	2.7959	2.8801
pos_5111	Yucalexin P21	metab_5110	-	-	-	HMDB0036754	pos	-	-	-	-	Lipids and lipid-like molecules	Prenol lipids	337.274	M+CH3OH+H	C20H32O2	8.2487	0.126654	-	64.7	1.35654	119626-54-9	Diterpenoids	2.6151	2.6022	2.6696	2.4562	2.752	2.8093	2.5776	2.7751	2.4095	2.6227	2.6265	2.4444	2.5638	2.6131	2.673
pos_5117	Sphinganine-phosphate	metab_5116	map00600;map04080	Sphingolipid metabolism;Neuroactive ligand-receptor interaction	C01120	LMSP01050002	pos	-	-	Metabolism;Environmental Information Processing	Lipid metabolism;Signaling molecules and interaction	-	-	382.271	M+H	C18H40NO5P	8.2487	0.061236	50.4	-	-0.760508	-	-	3.187	3.1137	3.0647	3.1454	3.2437	3.2489	3.2693	3.4724	3.401	3.1439	3.3265	3.3244	3.2637	3.2431	3.2955
pos_5121	Alpha-Terpineol propanoate	metab_5120	-	-	-	HMDB0032052	pos	-	-	-	-	Lipids and lipid-like molecules	Prenol lipids	228.195	M+NH4	C13H22O2	8.2297	0.0395964	-	76.4	-2.83688	80-27-3	Monoterpenoids	1.9942	1.728	1.6628	1.9791	1.8448	1.9348	2.0457	1.8543	1.6826	1.9822	1.9407	2.0029	1.9296	1.9422	1.9084
pos_5127	Nandrolone	metab_5126	-	-	C07254	HMDB0002725;LMST02010044	pos	-	-	-	-	Lipids and lipid-like molecules	Steroids and steroid derivatives	292.226	M+NH4	C18H26O2	8.2107	0.268544	-	74	-5.82231	434-22-0	Estrane steroids	2.1401	1.8334	2.1046	1.656	0.847	2.1382	2.019	2.4733	2.3639	1.8081	1.6718	1.7679	2.4017	2.3659	2.1656
pos_5154	Calcitriol	metab_5153	map01100;map05152;map04978;map04961;map00100	Metabolic pathways;Tuberculosis;Mineral absorption;Endocrine and other factor-regulated calcium reabsorption;Steroid biosynthesis	C01673	HMDB0001903	pos	Hormones and transmitters	Steroid hormones	Metabolism;Human Diseases;Organismal Systems;Organismal Systems;Metabolism	Global and overview maps;Infectious diseases: Bacterial;Digestive system;Excretory system;Lipid metabolism	Lipids and lipid-like molecules	Steroids and steroid derivatives	417.335	M+H	C27H44O3	8.0984	0.221458	55.3	-	-2.35231	32222-06-3	Vitamin D and derivatives	1.9259	1.6105	2.0824	1.8866	2.0062	1.9737	1.998	2.2425	2.3079	1.8418	1.6763	1.9277	1.9743	1.8981	2.0849
pos_5167	Sphingosine 1-phosphate	metab_5166	map01100;map04666;map05152;map00600;map04080;map04020;map04371;map04072;map04071	Metabolic pathways;Fc gamma R-mediated phagocytosis;Tuberculosis;Sphingolipid metabolism;Neuroactive ligand-receptor interaction;Calcium signaling pathway;Apelin signaling pathway;Phospholipase D signaling pathway;Sphingolipid signaling pathway	C06124	HMDB0000277	pos	-	-	Metabolism;Organismal Systems;Human Diseases;Metabolism;Environmental Information Processing;Environmental Information Processing;Environmental Information Processing;Environmental Information Processing;Environmental Information Processing	Global and overview maps;Immune system;Infectious diseases: Bacterial;Lipid metabolism;Signaling molecules and interaction;Signal transduction;Signal transduction;Signal transduction;Signal transduction	Lipids and lipid-like molecules	Sphingolipids	402.238	M+Na	C18H38NO5P	8.0604	0.198681	-	60.3	-0.477622	26993-30-6	Phosphosphingolipids	2.4884	1.7705	1.6985	2.3749	2.0672	1.9019	2.666	2.7201	2.42	1.9628	2.369	2.4	2.5193	2.5983	2.424
pos_5194	Hecogenin	metab_5193	-	-	C08902	LMST01080014	pos	-	-	-	-	-	-	431.315	M+H	C27H42O4	7.9497	0.105439	61.4	-	-1.83659	-	-	2.8613	2.7989	2.6226	2.8341	2.9239	2.8426	2.753	2.6998	2.9291	2.5568	2.7732	2.948	2.7923	2.8514	2.7629
pos_5205	(24S)-24,25-dihydroxyvitamin D3	metab_5204	-	-	-	LMST03020274	pos	-	-	-	-	-	-	417.336	M+H	C27H44O3	7.9253	0.0765893	51.3	-	-0.115235	-	-	2.1734	2.3769	2.3094	2.0695	2.3872	2.4466	2.3679	2.1172	2.3851	2.2581	2.2093	2.337	2.2984	2.2399	2.2449
pos_5267	2-Cyclotetradecen-1-one	metab_5266	-	-	-	HMDB0039884	pos	-	-	-	-	Organic oxygen compounds	Organooxygen compounds	226.216	M+NH4	C14H24O	7.9043	0.166974	-	64.7	-0.614943	55395-12-5	Carbonyl compounds	3.044	3.0066	3.0725	2.8444	2.5883	2.8281	2.7907	3.0433	3.1084	3.0428	2.9581	2.9573	2.9386	2.9272	3.0531
pos_5467	(25R)-3beta,4beta-dihydroxycholest-5-en-26-oate(1-)	metab_5466	-	-	-	HMDB0062794	pos	-	-	-	-	Lipids and lipid-like molecules	Steroids and steroid derivatives	455.311	M+Na	C27H44O4	7.5548	0.195843	-	63.9	-4.05176	-	Bile acids, alcohols and derivatives	2.2343	2.0578	2.0727	2.059	2.1526	2.0199	2.1424	1.9588	1.9294	2.1658	1.987	1.9466	2.1154	2.026	2.1963
pos_5483	(±)-(E)-13-Hydroxy-10-oxo-11-octadecenoic acid	metab_5482	-	-	-	HMDB0040900	pos	-	-	-	-	Lipids and lipid-like molecules	Fatty Acyls	277.215	M+H-2H2O	C18H32O4	7.5341	0.0398877	-	60.2	-2.4783	28979-44-4	Lineolic acids and derivatives	2.8958	2.408	2.1768	2.0196	2.0845	1.8302	2.8374	2.1411	2.4947	2.0899	2.7522	2.2987	2.4424	2.4621	2.4278
pos_5485	13-HDoHE	metab_5484	-	-	-	HMDB0060043	pos	-	-	-	-	Lipids and lipid-like molecules	Fatty Acyls	337.252	M+Na	C22H34O	7.5341	0.143457	-	61.3	6.1857	-	Fatty alcohols	2.4162	2.3469	2.3227	2.439	2.7862	2.5013	2.6667	2.3339	2.3154	2.4775	2.2222	2.2613	2.4106	2.5079	2.3983
pos_5493	5-Isopropyl-2-(2-methylpropyl)-2-cyclohexen-1-one	metab_5492	-	-	-	HMDB0038216	pos	-	-	-	-	Lipids and lipid-like molecules	Prenol lipids	212.2	M+NH4	C13H22O	7.5084	0.193313	-	68.7	-2.01778	79862-15-0	Monoterpenoids	2.2603	2.3244	2.4561	2.291	1.933	2.141	2.0812	2.4279	2.4051	2.2085	2.2317	2.3697	2.1664	2.3304	2.3078
pos_5514	Doxercalciferol	metab_5513	-	-	C08211	LMST03010069	pos	-	-	-	-	-	-	413.342	M+H	C28H44O2	7.487	0.0414014	60.9	-	0.958453	-	-	1.6868	1.2483	1.7043	1.2612	2.1639	1.9243	1.9366	1.6291	1.3644	1.5483	0.8893	0.8739	1.6962	1.6796	1.6609
pos_5534	Palmitoyl glucuronide	metab_5533	map01100;map00040;map04976	Metabolic pathways;Pentose and glucuronate interconversions;Bile secretion	C03033	HMDB0010331	pos	-	-	Metabolism;Metabolism;Organismal Systems	Global and overview maps;Carbohydrate metabolism;Digestive system	Lipids and lipid-like molecules	Fatty Acyls	383.276	M+H-2H2O	C22H42O7	7.4539	0.129765	-	66	-7.58319	-	Fatty acyl glycosides	1.658	1.3857	1.4879	1.4915	1.7662	1.7571	1.7589	1.7643	1.7242	1.779	1.7109	1.2329	1.5194	1.6298	1.5801
pos_5542	15-dehydro-prostaglandin E1(1-)	metab_5541	-	-	-	HMDB0062691	pos	-	-	-	-	Lipids and lipid-like molecules	Fatty Acyls	317.211	M+H-2H2O	C20H32O5	7.4436	0.11611	-	66.5	0.00124293	-	Eicosanoids	2.6862	0.7858	0.4768	0.5014	0.8038	0.4863	1.9729	0.9275	1.4568	0.421	1.9045	0.4517	1.7071	1.7942	1.798
pos_5574	N,N-dimethyl-Safingol	metab_5573	-	-	-	LMSP01080056	pos	-	-	-	-	-	-	330.336	M+H	C20H43NO2	7.4106	0.00495865	58.3	-	-0.552228	-	-	3.5132	3.4388	3.3852	3.2846	3.1904	3.4282	3.4151	3.3819	3.5449	3.3345	3.2372	3.215	3.3543	3.3545	3.3581
pos_5602	(11Z)-8,18-propano-retinal	metab_5601	-	-	-	LMPR01090045	pos	-	-	-	-	-	-	325.252	M+H	C23H32O	7.3681	0.0441218	56.1	-	-1.80453	-	-	2.125	1.8352	1.8291	2.2266	2.1649	1.9585	2.3611	2.0094	2.1704	1.625	1.8064	1.6723	1.9534	1.99	1.9643
pos_5627	Sphingosine	metab_5626	map00600;map01100;map04071;map04210	Sphingolipid metabolism;Metabolic pathways;Sphingolipid signaling pathway;Apoptosis	C00319	HMDB0000252;LMSP01010001	pos	-	-	Metabolism;Metabolism;Environmental Information Processing;Cellular Processes	Lipid metabolism;Global and overview maps;Signal transduction;Cell growth and death	Organic nitrogen compounds	Organonitrogen compounds	300.29	M+H	C18H37NO2	7.3251	0.0625544	80.5	-	-0.228184	123-78-4	Amines	2.3788	2.1589	1.994	2.304	2.3918	2.6631	2.5149	2.8367	3.4096	2.5012	2.3388	2.8843	2.6153	2.6646	2.6615
pos_5635	(Z)-7-Hexadecen-1,16-olide	metab_5634	-	-	-	HMDB0031086	pos	-	-	-	-	Phenylpropanoids and polyketides	Macrolides and analogues	270.243	M+NH4	C16H28O2	7.3148	0.213419	-	77.7	-0.973762	123-69-3	Not Available	2.3739	2.326	2.3678	2.2155	2.0935	2.1714	2.1448	2.411	2.4146	2.2639	2.2679	2.1963	2.1548	2.2936	2.1303
pos_5660	Dehydrocurdione	metab_5659	-	-	C16949	HMDB0035407	pos	-	-	-	-	Lipids and lipid-like molecules	Prenol lipids	252.196	M+NH4	C15H22O2	7.282	0.078499	-	90.4	-0.65546	38230-32-9	Sesquiterpenoids	1.8244	1.7478	1.8601	1.4121	0.8278	1.4989	1.514	1.8678	2.0684	1.8103	1.4904	1.6204	1.6383	1.5994	1.6662
pos_5709	35S-Methylokadaic acid 7-hexadecanoate	metab_5708	-	-	-	HMDB0030443	pos	-	-	-	-	Lipids and lipid-like molecules	Fatty Acyls	529.358	M+2H	C61H100O14	7.2283	0.133783	-	95.3	-8.48444	-	Fatty acid esters	2.223	2.4545	2.3862	2.4759	2.3165	2.2431	2.1956	2.3704	2.3991	2.3552	2.405	2.4165	2.3716	2.3613	2.2623
pos_5710	(6R)-6,19-epidioxy-1alpha-hydroxy-6,19-dihydrovitamin D3	metab_5709	-	-	-	LMST03020277	pos	-	-	-	-	-	-	433.331	M+H	C27H44O4	7.2283	0.0401868	64.3	-	-1.5765	-	-	2.4994	2.2908	2.3788	2.2669	2.4769	2.7383	2.2257	2.4275	2.769	2.3219	2.1413	2.719	2.4292	2.464	2.4468
pos_5742	26,26,26-trifluoro-25-hydroxyvitamin D3	metab_5741	-	-	-	LMST03020131	pos	-	-	-	-	-	-	455.313	M+H	C27H41F3O2	7.1958	0.0547669	59.1	-	0.625386	-	-	2.4623	2.5063	2.5135	2.5219	2.4971	2.6216	2.6277	2.5903	2.5565	2.5796	2.4703	2.5104	2.5616	2.5142	2.5417
pos_5795	Estrone glucuronide	metab_5794	map00140	Steroid hormone biosynthesis	C11133	HMDB0004483	pos	-	-	Metabolism	Lipid metabolism	Lipids and lipid-like molecules	Steroids and steroid derivatives	488.229	M+ACN+H	C24H30O8	7.109	0.247787	-	70.3	1.65868	2479-90-5	Steroidal glycosides	1.3229	1.3146	1.3704	1.4411	1.6714	1.4939	1.4923	1.2628	1.2965	1.4551	1.3396	1.651	1.3766	1.589	1.5458
pos_5807	5b-Cholestane-3a,7a,12a,23S,25-pentol	metab_5806	-	-	-	HMDB0000483;LMST01010241	pos	-	-	-	-	Lipids and lipid-like molecules	Steroids and steroid derivatives	435.347	M+H-H2O	C27H48O5	7.0591	0.163049	-	64.2	-0.326771	59906-15-9	Bile acids, alcohols and derivatives	2.1014	1.4701	1.7663	1.8966	2.0112	1.5219	2.0925	1.4969	1.627	1.9457	1.0134	1.9507	1.9607	1.8197	1.9189
pos_5810	3-(2,4-Cyclopentadien-1-ylidene)-5alpha-androstan-17beta-ol	metab_5809	-	-	C14915	-	pos	-	-	-	-	-	-	339.268	M+H	C24H34O	7.0495	0.0523981	81.6	-	-0.396371	-	-	2.9583	2.6884	2.6679	2.9156	2.9046	2.5567	2.9189	2.6602	2.7829	2.6573	2.4299	2.7235	2.7419	2.7816	2.7437
pos_5857	6-Hydroxypentadecanedioic acid	metab_5856	-	-	-	HMDB0031885	pos	-	-	-	-	Lipids and lipid-like molecules	Fatty Acyls	253.18	M+H-2H2O	C15H28O5	7.0013	0.0777987	-	76.9	-0.542126	38076-52-7	Fatty acids and conjugates	1.3753	1.4292	1.2002	1.4172	1.5484	1.5969	1.7028	1.4624	1.5377	1.3712	1.7294	1.0115	1.5462	1.545	1.6014
pos_5895	Phytosphingosine	metab_5894	map00600;map01100	Sphingolipid metabolism;Metabolic pathways	C12144	LMSP01030001;HMDB0004610	pos	-	-	Metabolism;Metabolism	Lipid metabolism;Global and overview maps	Organic nitrogen compounds	Organonitrogen compounds	318.3	M+H	C18H39NO3	6.9583	0.0245771	-	56.1	-0.0659801	554-62-1	Amines	2.8973	2.846	2.8574	2.5394	2.5389	2.8008	2.7681	2.7745	2.8758	2.6832	2.5586	2.6773	2.7134	2.7335	2.7175
pos_5906	(3beta,17alpha,23R)-17,23-Epoxy-3,29-dihydroxy-27-norlanost-8-ene-15,24-dione	metab_5905	-	-	-	HMDB0035112	pos	-	-	-	-	Lipids and lipid-like molecules	Prenol lipids	455.316	M+H-H2O	C29H44O5	6.9482	0.0912028	-	73.9	0.147777	-	Triterpenoids	2.2132	2.3457	2.3088	2.4463	2.6048	2.4229	2.4347	2.5649	2.4665	2.3563	2.3866	2.3267	2.4394	2.4631	2.3848
pos_5933	Palmitaldehyde	metab_5932	map00071	Fatty acid degradation	C00517	HMDB0001551;LMFA06000088	pos	-	-	Metabolism	Lipid metabolism	Lipids and lipid-like molecules	Fatty Acyls	258.279	M+NH4	C16H32O	6.9153	0.18095	-	67.4	-0.257922	629-80-1	Fatty aldehydes	1.734	1.6105	1.6057	1.5484	1.3753	1.7193	1.6446	1.7398	1.7163	1.662	1.4375	1.4569	1.5592	1.6239	1.7109
pos_5991	1alpha-hydroxy-25,26,27-trinorvitamin D3 24-carboxylic acid	metab_5990	-	-	-	LMST03020022	pos	-	-	-	-	-	-	389.269	M+H	C24H36O4	6.8322	0.016568	67.5	-	-0.316102	-	-	2.6208	2.4709	2.3812	2.7997	3.0439	2.4527	2.9968	2.469	2.5501	2.6201	2.3318	2.5482	2.6792	2.6779	2.6909
pos_5996	Panaquinquecol 1	metab_5995	-	-	-	HMDB0038035;LMFA05000686	pos	-	-	-	-	Lipids and lipid-like molecules	Fatty Acyls	310.237	M+NH4	C18H28O3	6.8223	0.0877291	-	56.8	-3.29065	133921-57-0	Fatty alcohols	1.6158	1.6102	2.1877	1.2352	1.3262	1.0007	1.6716	1.7545	1.5339	1.587	1.8713	1.5039	1.8069	1.7373	1.7518
pos_6003	Polyoxyethylene 40 monostearate	metab_6002	-	-	-	HMDB0032477	pos	-	-	-	-	Lipids and lipid-like molecules	Fatty Acyls	346.332	M+NH4	C20H40O3	6.7928	0.039227	-	57.1	0.0455161	9004-99-3	Fatty acid esters	3.5836	3.5582	3.5518	3.4589	3.3374	3.5716	3.5765	3.5813	3.6444	3.5049	3.4219	3.1024	3.4599	3.4922	3.4676
pos_6037	Coprocholic acid	metab_6036	-	-	-	HMDB0000601	pos	-	-	-	-	Lipids and lipid-like molecules	Steroids and steroid derivatives	433.331	M+H-H2O	C27H46O5	6.6853	0.0690468	-	58.2	-0.471415	547-98-8	Bile acids, alcohols and derivatives	2.3387	2.3285	2.3032	2.3712	2.8484	2.3469	2.9776	2.4108	2.2878	2.3226	2.0901	2.3931	2.5268	2.5114	2.4683
pos_6039	Ethyl salicylate	metab_6038	-	-	-	HMDB0029817	pos	-	-	-	-	Benzenoids	Benzene and substituted derivatives	167.07	M+H	C9H10O3	6.6853	0.0716162	59.4	-	-2.51151	118-61-6	Benzoic acids and derivatives	2.796	3.0007	3.1126	3.1188	2.903	2.9034	2.9309	2.9762	2.9372	3.0656	2.9946	3.1456	2.9389	2.9172	2.877
pos_6068	TOTAROL-19-CARBOXYLIC ACID	metab_6067	-	-	-	-	pos	-	-	-	-	-	-	317.211	M+H	C20H28O3	6.6527	0.0549467	55.5	-	0.213231	-	-	2.2043	1.6119	1.5488	1.3544	1.7047	1.6337	1.6892	1.3404	1.746	1.6543	1.8512	1.063	1.7217	1.6806	1.6832
pos_6073	Bufalin	metab_6072	-	-	C16922	LMST01130001	pos	Steroids	24-Carbon atoms	-	-	-	-	387.254	M+H	C24H34O4	6.6425	0.117667	54.3	-	2.14305	-	-	0.7321	0.9432	0.9624	1.6212	1.7092	1.1285	1.8451	1.0819	1.571	1.9243	0.771	1.59	1.4275	1.4562	1.522
pos_6104	3-Oxocholic acid	metab_6103	-	-	-	LMST04010443;HMDB0000502	pos	-	-	-	-	Lipids and lipid-like molecules	Steroids and steroid derivatives	424.305	M+NH4	C24H38O5	6.5885	0.0695931	-	62.7	-0.664028	2304-89-4	Bile acids, alcohols and derivatives	1.4159	1.784	1.4497	1.3713	1.9692	2.4176	1.6115	1.7597	1.9375	1.6981	1.1997	1.547	1.8095	1.8618	1.813
pos_6163	Pregnan-20-one, 17-(acetyloxy)-3-hydroxy-6-methyl-, (3b,5b,6a)-	metab_6162	-	-	-	-	pos	-	-	-	-	-	-	391.284	M+H	C24H38O4	6.4808	0.0909496	71.1	-	-0.389	-	-	2.5359	2.3632	2.3674	2.4891	2.7832	2.3527	2.941	2.6395	2.5001	2.4252	2.2388	2.0197	2.503	2.549	2.4712
pos_6172	C17 Sphinganine	metab_6171	-	-	-	LMSP01040003	pos	-	-	-	-	-	-	288.29	M+H	C17H37NO2	6.4707	0.0144759	68.3	-	0.178181	-	-	3.4327	3.1268	3.3248	3.2184	3.1119	3.3183	3.1942	3.4667	3.4748	3.2153	3.1431	3.0627	3.2583	3.263	3.2505
pos_6192	(9Z,11S,16S)-1-Acetoxy-9,17-octadecadiene-12,14-diyne-11,16-diol	metab_6191	-	-	-	HMDB0038966	pos	-	-	-	-	Lipids and lipid-like molecules	Fatty Acyls	350.229	M+NH4	C20H28O4	6.4398	0.239249	-	77.1	-9.34982	52691-49-3	Fatty alcohols	1.9591	1.6865	1.7012	1.6474	1.0901	1.6578	1.6756	1.8332	1.9685	1.6612	1.8709	1.683	1.7045	1.6421	1.8362
pos_6193	2-trans,4-cis-Decadienoylcarnitine	metab_6192	-	-	-	HMDB0013325	pos	-	-	-	-	Lipids and lipid-like molecules	Fatty Acyls	276.193	M+H-2H2O	C17H29NO4	6.4398	0.0908131	-	52.6	-9.2051	-	Fatty acid esters	2.3061	2.2307	2.3133	2.0708	2.0494	2.12	2.1681	2.2851	2.241	2.1998	2.1237	2.1211	2.1839	2.2487	2.181
pos_6202	Cholacalcioic acid	metab_6201	-	-	-	-	pos	-	-	-	-	-	-	373.274	M+H	C24H36O3	6.4204	0.0475497	51.6	-	-0.593646	-	-	2.7016	2.4229	2.294	2.4463	2.6007	2.4231	2.822	2.6716	2.7265	2.4612	2.5132	2.866	2.6481	2.6163	2.6556
pos_6207	13-HOTE	metab_6206	-	-	-	LMFA02000029;HMDB0010203	pos	-	-	-	-	Lipids and lipid-like molecules	Fatty Acyls	312.253	M+NH4	C18H30O3	6.4012	0.13507	-	75.2	-0.197917	-	Lineolic acids and derivatives	2.8225	2.7796	2.8479	2.7901	2.6028	2.7088	2.8417	2.9474	2.959	2.6955	2.7081	2.7362	2.7204	2.8091	2.7034
pos_6210	Gamma-Aminobutyryl-lysine	metab_6209	-	-	-	HMDB0001959	pos	-	-	-	-	Organic acids and derivatives	Peptidomimetics	463.327	2M+H	C10H21N3O3	6.3663	0.0702849	-	71	6.62744	22468-02-6	Hybrid peptides	2.189	2.2183	2.2097	2.3355	2.3196	2.2805	2.3397	2.3152	2.312	2.3095	2.3341	2.2482	2.3222	2.2867	2.3476
pos_6218	Temocaprilat	metab_6217	-	-	C11373	HMDB0061721	pos	-	-	-	-	Organic acids and derivatives	Carboxylic acids and derivatives	481.149	M+CH3OH+H	C21H24N2O5S2	6.3565	0.0733878	-	56.6	6.17547	-	Amino acids, peptides, and analogues	2.3289	2.5375	2.059	1.2589	2.8489	2.595	2.5972	2.6466	2.9927	2.7187	1.7719	2.4197	2.541	2.4813	2.4951
pos_6225	Trihexosylceramide (d18:1/24:0)	metab_6224	-	-	C04737	HMDB0004886	pos	-	-	-	-	Lipids and lipid-like molecules	Sphingolipids	590.892	M+2Na	C60H113NO18	6.3462	0.0477463	-	50.1	7.85558	-	Glycosphingolipids	2.7798	2.9979	2.9274	3.0588	2.9841	2.8174	2.8035	2.8499	2.7599	2.9116	3.0319	2.8807	2.9227	2.8907	2.8845
pos_6260	MG(0:0/15:0/0:0)	metab_6259	-	-	-	HMDB0011532	pos	-	-	-	-	Lipids and lipid-like molecules	Glycerolipids	334.295	M+NH4	C18H36O4	6.2309	0.037081	-	60.9	-0.821523	-	Monoradylglycerols	3.2312	3.2449	3.2718	3.0106	3.1842	3.2523	3.1057	3.2151	3.2842	3.1084	3.1095	3.1132	3.1703	3.1469	3.178
pos_6265	19-Nor-5-androstenediol	metab_6264	-	-	-	LMST02010050;HMDB0004590	pos	-	-	-	-	Lipids and lipid-like molecules	Steroids and steroid derivatives	294.242	M+NH4	C18H28O2	6.2025	0.240384	-	88.7	-2.09899	25975-59-1	Estrane steroids	2.6249	2.4898	2.5292	2.2782	2.3544	2.3744	2.4508	2.4886	2.557	2.2687	2.3891	2.3693	2.5245	2.3589	2.5714
pos_6273	Melleolide B	metab_6272	-	-	-	HMDB0038787	pos	-	-	-	-	Lipids and lipid-like molecules	Prenol lipids	474.249	M+ACN+H	C24H32O7	6.1835	0.073676	-	65	-0.169984	101901-55-7	Sesquiterpenoids	2.3824	2.3231	2.2046	2.4119	2.4381	2.3107	2.2342	2.3386	2.1098	2.4214	2.2732	2.1835	2.3464	2.41	2.3867
pos_6274	Clausarinol	metab_6273	-	-	-	HMDB0041407	pos	-	-	-	-	Phenylpropanoids and polyketides	Coumarins and derivatives	432.238	M+NH4	C24H30O6	6.1835	0.165529	-	53.2	-0.616361	-	Pyranocoumarins	3.558	3.4855	3.4986	3.4655	3.3969	3.5131	3.5466	3.5824	3.6356	3.5183	3.5196	3.4321	3.4871	3.5166	3.6197
pos_6277	2-Phenylethyl beta-D-glucopyranoside	metab_6276	-	-	-	HMDB0029819	pos	-	-	-	-	Organic oxygen compounds	Organooxygen compounds	267.122	M+H-H2O	C14H20O6	6.1835	0.0694663	-	70.1	-1.65299	18997-54-1	Carbohydrates and carbohydrate conjugates	3.2943	3.2605	3.2454	3.3224	3.1468	3.2714	3.2438	3.3024	3.2884	3.2917	3.1895	2.9879	3.2181	3.2103	3.2651
pos_6287	C16 Sphingosine	metab_6286	-	-	-	LMSP01040008	pos	-	-	-	-	-	-	272.258	M+H	C16H33NO2	6.1548	0.12096	81.9	-	-2.16452	-	-	2.9499	2.9406	3.0285	2.8552	3.0018	3.0094	3.0105	3.0415	2.9556	2.9238	2.9073	2.8782	2.9051	3.0076	2.9431
pos_6333	24,25-Dihydroxyvitamin D	metab_6332	-	-	-	HMDB0000430	pos	-	-	-	-	Lipids and lipid-like molecules	Steroids and steroid derivatives	399.325	M+H-H2O	C27H44O3	6.024	0.150555	-	95.6	-1.43474	40013-87-4	Vitamin D and derivatives	1.821	1.7628	1.6662	1.5354	1.7507	1.7625	1.2322	1.5409	1.3629	1.9658	2.0302	0.2253	1.6724	1.7433	1.6163
pos_6339	Hydroxypelenolide	metab_6338	-	-	-	HMDB0036663	pos	-	-	-	-	Lipids and lipid-like molecules	Prenol lipids	270.207	M+NH4	C15H24O3	5.9929	0.0859528	-	68.6	1.72957	17909-94-3	Terpene lactones	1.4614	1.2842	1.4204	1.5624	1.41	1.4658	1.3498	1.5502	1.4734	1.5426	1.3861	1.1335	1.3525	1.4162	1.359
pos_6463	3-Methyl-1-phenyl-1-butanone	metab_6462	-	-	-	-	pos	-	-	-	-	-	-	163.112	M+H	C11H14O	5.6665	0.0111406	54.9	-	-1.18802	-	-	2.1655	2.1881	2.4337	2.2711	2.1587	2.2185	2.2393	2.2327	2.2765	2.3321	2.1167	2.3029	2.1683	2.1601	2.16
pos_6486	2,4,4-Trimethylcyclopentanone	metab_6485	-	-	-	HMDB0031197	pos	-	-	-	-	Organic oxygen compounds	Organooxygen compounds	144.138	M+NH4	C8H14O	5.5502	0.0728614	-	62.4	-1.42184	4694-12-06	Carbonyl compounds	2.315	2.4454	2.5203	2.0011	1.8759	2.3601	2.0715	2.4632	2.2932	2.3031	2.1383	1.9659	2.257	2.2454	2.3039
pos_6507	21-Deoxycortisol	metab_6506	map00140	Steroid hormone biosynthesis	C05497	HMDB0004030;LMST02030195	pos	Hormones and transmitters	Steroid hormones	Metabolism	Lipid metabolism	Lipids and lipid-like molecules	Steroids and steroid derivatives	347.222	M+H	C21H30O4	5.4554	0.152584	54.8	-	0.116055	641-77-0	Pregnane steroids	1.8402	1.8789	2.6396	2.0897	2.1296	1.9461	1.6351	2.4102	2.5225	2.5248	2.6883	2.5123	2.4144	2.5189	2.4036
pos_6536	PE-NMe2(22:5(4Z,7Z,10Z,13Z,16Z)/22:6(4Z,7Z,10Z,13Z,16Z,19Z))	metab_6535	-	-	-	HMDB0114546	pos	-	-	-	-	Lipids and lipid-like molecules	Glycerophospholipids	433.792	M+2H	C51H80NO8P	5.3096	0.0988744	-	77.9	8.73807	-	Glycerophosphoethanolamines	1.9888	2.2108	1.99	2.2614	2.2077	2.0852	2.1402	2.076	2.0288	1.9805	2.263	2.2103	2.1639	2.1222	2.2075
pos_6564	Beta-Bixin	metab_6563	-	-	-	HMDB0035074	pos	-	-	-	-	Lipids and lipid-like molecules	Prenol lipids	359.204	M+H-2H2O	C25H30O4	5.2174	0.187134	-	51.1	7.78054	39937-23-0	Diterpenoids	1.6429	1.7942	1.5508	1.8237	1.7014	1.7997	1.7718	1.6974	1.8135	1.7054	1.8328	1.7803	1.8698	1.7091	1.8323
pos_6579	Madlongiside C	metab_6578	-	-	-	HMDB0037904	pos	-	-	-	-	Lipids and lipid-like molecules	Prenol lipids	601.379	M+H-2H2O	C35H56O10	5.0934	0.132594	-	95.9	8.99043	67258-70-2	Triterpenoids	1.9199	2.0956	1.8897	2.1435	2.1299	2.0861	2.1998	2.049	2.1935	1.9059	2.1992	2.2317	2.1888	2.0789	2.1736
pos_6583	Valyl-Valine	metab_6582	-	-	-	HMDB0029140	pos	-	-	-	-	Organic acids and derivatives	Carboxylic acids and derivatives	450.331	2M+NH4	C10H20N2O3	5.0934	0.0955848	-	55.7	4.48296	-	Amino acids, peptides, and analogues	1.8673	2.0465	2.0223	2.1183	2.07	1.9163	2.0237	1.9949	2.0745	1.9557	2.1651	2.0703	2.0791	2.0314	1.9979
pos_6603	8-Angeloylegelolide	metab_6602	-	-	-	HMDB0037773	pos	-	-	-	-	Organoheterocyclic compounds	Cycloheptafurans	366.192	M+NH4	C19H24O6	5.0418	0.0241534	-	69	3.3916	142449-63-6	Not Available	1.9565	1.6328	1.3168	1.3477	1.4369	1.4766	1.6025	1.7351	1.4924	1.7281	1.3143	0.9971	1.6272	1.6146	1.607
pos_6607	7-hydroxy-3-(2,3,4-trihydroxyphenyl)-4H-chromen-4-one	metab_6606	-	-	-	HMDB0134014	pos	-	-	-	-	Phenylpropanoids and polyketides	Isoflavonoids	350.061	M+ACN+Na	C15H10O6	5.0308	0.0447903	-	66.5	-9.8549	-	Isoflav-2-enes	1.8876	0.7158	2.0207	1.52	1.3993	0.8908	1.4456	1.0826	0.9933	1.2153	1.658	1.7823	1.5966	1.5823	1.5589
pos_6625	PS(14:0/18:0)	metab_6624	-	-	-	HMDB0012334;LMGP03010928	pos	-	-	-	-	Lipids and lipid-like molecules	Glycerophospholipids	379.748	M+H+Na	C38H74NO10P	4.9894	0.0769111	-	95.3	-8.25653	-	Glycerophosphoserines	2.0582	2.1809	2.0736	2.19	2.168	2.115	2.1783	2.0819	2.1414	2.0224	2.2027	2.1611	2.2175	2.1655	2.1576
pos_6627	Triamcinolone	metab_6626	-	-	-	HMDB0014758	pos	-	-	-	-	Lipids and lipid-like molecules	Steroids and steroid derivatives	436.215	M+ACN+H	C21H27FO6	4.9686	0.157595	-	77.6	4.819	124-94-7	Hydroxysteroids	1.8343	1.83	1.8326	1.8156	1.6671	1.7494	1.6128	1.6464	1.7469	1.7474	1.8828	1.7724	1.877	1.7617	1.8909
pos_6643	3-Indolepropionic acid	metab_6642	-	-	-	-	pos	-	-	-	-	-	-	190.086	M+H	C11H11NO2	4.8446	0.180333	87.2	-	-2.74271	-	-	1.1858	1.6755	1.1602	1.6152	1.5757	1.7217	1.6278	1.7711	1.0962	1.1589	0.9805	1.1613	1.4227	1.3965	1.5338
pos_6659	(4R,6R)-cis-Carveol	metab_6658	-	-	C11395	LMPR0102090030	pos	-	-	-	-	-	-	153.127	M+H	C10H16O	4.7619	0.208645	58.8	-	-0.0919582	-	-	1.4997	1.4137	1.5881	1.3894	1.3532	1.6198	1.5023	1.6501	1.7293	1.674	1.476	1.3704	1.4698	1.5139	1.337
pos_6663	(1R,2R,4S)-p-Menthane-1,2,8-triol 8-glucoside	metab_6662	-	-	-	HMDB0039894	pos	-	-	-	-	Organic oxygen compounds	Organooxygen compounds	315.177	M+H-2H2O	C16H30O8	4.7413	0.111434	-	53.4	-9.68574	378254-09-2	Carbohydrates and carbohydrate conjugates	1.5855	1.3763	1.4795	1.339	1.3471	1.4895	1.5116	1.5744	1.5278	1.5917	1.3642	1.3046	1.4928	1.4235	1.5158
pos_6665	Merodesmosine	metab_6664	-	-	-	HMDB0030407	pos	-	-	-	-	Organic acids and derivatives	Carboxylic acids and derivatives	367.231	M+H-2H2O	C18H34N4O6	4.7314	0.0798001	-	86	-6.36324	17096-97-8	Amino acids, peptides, and analogues	1.72	1.5736	1.3228	1.5676	1.6419	1.4881	1.6334	1.5437	1.6357	1.4284	1.6852	1.6217	1.5827	1.5952	1.6455
pos_6669	N-[[3-Hydroxy-2-(2-pentenyl)cyclopentyl]acetyl]isoleucine	metab_6668	-	-	-	HMDB0041248	pos	-	-	-	-	Organic acids and derivatives	Carboxylic acids and derivatives	343.259	M+NH4	C18H31NO4	4.7108	0.0419548	-	94.4	-0.631379	162854-97-9	Amino acids, peptides, and analogues	1.4591	1.5827	1.2627	0.9192	1.444	1.4021	1.2962	1.6311	1.3707	1.5883	1.0993	0.9452	1.3866	1.3769	1.4106
pos_6683	Absinthin	metab_6682	-	-	C09286	HMDB0035742	pos	-	-	-	-	Lipids and lipid-like molecules	Prenol lipids	461.271	M+H-2H2O	C30H40O6	4.5858	0.102684	-	94.8	4.9847	1362-42-1	Sesterterpenoids	1.8135	1.852	1.8591	1.9929	1.6696	1.7033	1.7078	1.7711	1.9137	1.6513	1.8012	1.7479	1.839	1.8365	1.7593
pos_6697	Trihexosylceramide (d18:1/18:0)	metab_6696	-	-	C04737	HMDB0004880	pos	-	-	-	-	Lipids and lipid-like molecules	Sphingolipids	537.852	M+H+Na	C54H101NO18	4.5333	0.0454706	-	50.2	5.32116	-	Glycosphingolipids	2.6	2.7144	2.7022	2.7927	2.6969	2.6199	2.645	2.6464	2.659	2.5904	2.7498	2.684	2.721	2.7101	2.6824
pos_6749	Ethyl 3-hydroxydodecanoate	metab_6748	-	-	-	HMDB0059850	pos	-	-	-	-	Lipids and lipid-like molecules	Fatty Acyls	262.238	M+NH4	C14H28O3	4.3211	0.0953576	-	68.8	-0.168387	-	Fatty alcohols	2.4858	2.3345	2.4387	2.2771	2.1946	2.3767	2.3852	2.5487	2.4777	2.5117	2.2981	1.9431	2.3447	2.3415	2.4128
pos_6835	33-Deoxy-33-hydroperoxyfurohyperforin	metab_6834	-	-	-	HMDB0038387	pos	-	-	-	-	Lipids and lipid-like molecules	Prenol lipids	533.366	M+H-2H2O	C35H52O6	4.026	0.172348	-	65	5.83915	-	Monoterpenoids	1.6234	1.7207	1.6138	1.69	1.6281	1.5376	1.6213	1.6262	1.6983	1.5077	1.6557	1.568	1.6913	1.6102	1.5464
pos_7108	Phenylacetylglycine	metab_7107	map00360	Phenylalanine metabolism	C05598	HMDB0000821	pos	-	-	Metabolism	Amino acid metabolism	Organic acids and derivatives	Carboxylic acids and derivatives	194.08	M+H	C10H11NO3	3.4463	0.200536	94.8	-	-4.4002	500-98-1	Amino acids, peptides, and analogues	3.5633	3.2655	3.2625	3.2834	3.4366	3.4628	3.4797	3.3411	3.5258	3.544	3.3736	3.3868	3.2466	3.4224	3.3391
pos_7131	Docosahexaenoyl Ethanolamide	metab_7130	-	-	-	HMDB0013658	pos	-	-	-	-	Organic nitrogen compounds	Organonitrogen compounds	394.27	M+Na	C24H37NO2	3.3418	0.0302723	-	72.9	-3.12549	162758-94-3	Amines	5.3983	5.5346	5.5133	5.5941	5.5234	5.4568	5.4682	5.4281	5.4903	5.4081	5.5303	5.5359	5.5137	5.4945	5.4887
pos_7156	1-Phenyl-1-pentanone	metab_7155	-	-	-	HMDB0031208	pos	-	-	-	-	Organic oxygen compounds	Organooxygen compounds	180.138	M+NH4	C11H14O	3.2377	0.196764	-	52	-2.59776	1009-14-9	Carbonyl compounds	2.6177	2.6875	2.7985	2.8588	2.6451	2.5851	2.5488	2.666	2.5642	2.8205	2.805	2.6803	2.5593	2.7167	2.7185
pos_7190	Vulgaxanthin I	metab_7189	-	-	C08568	HMDB0029840	pos	-	-	-	-	Organic acids and derivatives	Carboxylic acids and derivatives	362.099	M+Na	C14H17N3O7	3.1242	0.210582	-	64.1	9.84766	904-62-1	Amino acids, peptides, and analogues	1.9179	1.5084	0.9494	0.9819	2.029	1.5386	2.0057	1.555	1.5799	1.5373	2.1419	1.8547	1.8868	2.0451	2.0639
pos_7209	Furazolidone	metab_7208	-	-	C07999	HMDB0014752	pos	-	-	-	-	Organoheterocyclic compounds	Furans	243.07	M+NH4	C8H7N3O5	3.0624	0.164083	-	52.1	-9.36615	67-45-8	Nitrofurans	2.4657	2.5194	2.4033	2.6909	2.8307	2.7385	2.5039	2.7948	2.8022	2.5371	2.6231	2.4998	2.6984	2.5748	2.7103
pos_7219	Hippuric acid	metab_7218	map00360	Phenylalanine metabolism	C01586	HMDB0000714	pos	-	-	Metabolism	Amino acid metabolism	Benzenoids	Benzene and substituted derivatives	180.065	M+H	C9H9NO3	3.043	0.186497	96	-	-4.86029	495-69-2	Benzoic acids and derivatives	2.604	2.4334	2.1855	2.3562	2.6364	2.2428	2.3085	2.3918	2.6415	2.5472	2.4861	2.1476	2.4465	2.2952	2.3363
pos_7234	Nonyl isovalerate	metab_7233	-	-	-	LMFA07010977;HMDB0038034	pos	-	-	-	-	Lipids and lipid-like molecules	Fatty Acyls	267.17	M+K	C14H28O2	3.0139	0.100262	-	53.1	-8.27812	7786-47-2	Fatty alcohol esters	1.7651	1.9359	1.7981	1.8777	1.8534	1.793	1.6217	1.8757	1.8151	1.8429	1.836	1.5831	1.8405	1.8389	1.7631
pos_7237	L,L-Cyclo(leucylprolyl)	metab_7236	-	-	-	HMDB0034276	pos	-	-	-	-	Organic acids and derivatives	Carboxylic acids and derivatives	233.125	M+Na	C11H18N2O2	3.0039	0.0666716	-	52.2	-2.67074	2873-36-1	Amino acids, peptides, and analogues	1.7422	1.8478	1.6769	1.9994	1.758	1.7628	1.7623	1.7725	1.798	1.8011	1.7576	1.7458	1.7871	1.7949	1.7412
pos_7238	Cyclo	metab_7237	-	-	-	-	pos	-	-	-	-	-	-	211.144	M+H	C11H18N2O2	3.0039	0.0467131	66.5	-	-2.67456	-	-	2.9565	3.1081	3.1406	3.1797	3.0392	2.9593	3.0073	3.0005	3.0842	2.9909	2.9905	3.0823	3.047	3.0521	3.0142
pos_7286	N,N,O-Tridesmethyltramadol	metab_7285	-	-	-	HMDB0060850	pos	-	-	-	-	Benzenoids	Benzene and substituted derivatives	239.174	M+NH4	C13H19NO2	2.881	0.248264	-	52.4	-6.98068	1235568-21-4	Cyclohexylphenols	1.805	2.1328	2.1024	2.2553	2.2621	1.8462	1.8575	2.1076	2.0489	2.0731	2.2295	2.0334	2.1602	2.0479	1.9461
pos_7309	Heptaethylene glycol	metab_7308	-	-	-	HMDB0061835	pos	-	-	-	-	Organic oxygen compounds	Organooxygen compounds	344.23	M+NH4	C14H30O8	2.8195	0.247838	-	52.5	7.09641	5617-32-3	Ethers	1.9276	1.6685	0.737	1.6398	1.1249	1.1941	1.3199	1.3082	1.0208	1.2028	2.0999	1.0704	1.6986	1.708	1.5043
pos_7311	1-Methoxy-1H-indole-3-acetonitrile	metab_7310	-	-	-	HMDB0040973	pos	-	-	-	-	Organoheterocyclic compounds	Indoles and derivatives	187.086	M+H	C11H10N2O	2.8195	0.0680494	68.8	-	-4.20987	30536-48-2	Indoles	2.7886	2.5152	2.4528	2.3888	2.3885	2.4851	2.1345	2.398	2.3322	2.237	2.0845	1.912	2.3065	2.3311	2.2722
pos_7317	S-(4,5-Dihydro-2-methyl-3-furanyl) ethanethioate	metab_7316	-	-	-	HMDB0037786	pos	-	-	-	-	Organoheterocyclic compounds	Dihydrofurans	176.073	M+NH4	C7H10O2S	2.8102	0.198738	-	67.3	-3.60622	26486-14-6	Not Available	1.4289	1.9307	1.8897	1.122	2.3998	2.0561	2.1171	2.0112	2.2901	1.6483	1.0695	1.8612	2.0293	1.8986	2.0713
pos_7327	N-Acetylisoputreanine	metab_7326	-	-	-	HMDB0094713	pos	-	-	-	-	Organic acids and derivatives	Carboxylic acids and derivatives	185.127	M+H-H2O	C9H18N2O3	2.7604	0.227416	-	89.5	-6.12581	-	Amino acids, peptides, and analogues	1.0001	1.5872	1.7609	1.7478	1.7497	1.1746	1.6884	1.8389	1.9748	1.1099	1.7692	0.7169	1.5524	1.6885	1.5121
pos_7333	2,4-Dihydroxy-7,8-dimethoxy-2H-1,4-benzoxazin-3(4H)-one 2-glucoside	metab_7332	-	-	-	HMDB0037550	pos	-	-	-	-	Organic oxygen compounds	Organooxygen compounds	436.145	M+CH3OH+H	C16H21NO11	2.7197	0.0501624	-	78.1	0.679677	40246-08-0	Carbohydrates and carbohydrate conjugates	1.762	1.8318	1.9419	1.7515	1.608	1.7545	1.7288	1.8565	1.943	1.3512	1.2896	1.4265	1.6049	1.6466	1.62
pos_7334	Aminocaproic acid	metab_7333	map01100	Metabolic pathways	C02378	HMDB0001901	pos	-	-	Metabolism	Global and overview maps	Lipids and lipid-like molecules	Fatty Acyls	173.128	M+ACN+H	C6H13NO2	2.7099	0.0501295	-	62.8	-5.13489	60-32-2	Fatty acids and conjugates	1.5836	1.8803	1.8433	1.334	1.2064	1.3826	1.7921	1.751	2.2619	1.4811	1.6235	1.5093	1.6768	1.6858	1.717
pos_7341	Pantothenic Acid	metab_7340	map01100;map00770;map00410;map04977	Metabolic pathways;Pantothenate and CoA biosynthesis;beta-Alanine metabolism;Vitamin digestion and absorption	C00864	HMDB0000210	pos	Vitamins and Cofactors	Vitamins	Metabolism;Metabolism;Metabolism;Organismal Systems	Global and overview maps;Metabolism of cofactors and vitamins;Metabolism of other amino acids;Digestive system	Organic oxygen compounds	Organooxygen compounds	220.117	M+H	C9H17NO5	2.53	0.0107025	72.1	-	-3.094	79-83-4	Alcohols and polyols	2.2421	2.3827	2.3514	2.0598	2.5299	2.6182	2.2534	2.5465	2.5446	2.6239	2.0576	2.6902	2.4623	2.4606	2.4535
pos_7355	Trans-Grandmarin	metab_7354	-	-	-	HMDB0039030	pos	-	-	-	-	Phenylpropanoids and polyketides	Coumarins and derivatives	310.127	M+NH4	C15H16O6	1.9763	0.0761976	-	80.1	-4.05173	119239-48-4	Pyranocoumarins	1.864	1.7824	1.8327	1.8965	2.1132	1.8565	2.2305	1.9066	1.8972	1.8379	1.928	2.1052	1.9236	1.9424	1.8779
pos_7357	PHENACYLAMINE	metab_7356	-	-	-	-	pos	-	-	-	-	-	-	136.075	M+H	C8H9NO	1.8818	0.10629	74	-	-3.94247	-	-	1.9912	1.9833	1.9943	2.195	2.0115	2.009	2.1926	1.9699	1.929	1.89	2.045	1.8943	2.0085	1.981	2.069
pos_7358	Hydroxyprolyl-Proline	metab_7357	-	-	-	HMDB0028871	pos	-	-	-	-	Organic acids and derivatives	Carboxylic acids and derivatives	211.107	M+H-H2O	C10H16N2O4	1.8563	0.0860641	-	56.5	-3.24523	-	Amino acids, peptides, and analogues	2.7384	2.7912	2.502	2.7488	2.4762	2.6885	2.6291	2.6387	3.002	2.5473	2.731	2.6605	2.6843	2.6815	2.746
pos_7360	4-formyl Indole	metab_7359	-	-	-	-	pos	-	-	-	-	-	-	146.059	M+H	C9H7NO	1.8309	0.0653113	62.7	-	-4.4104	-	-	2.0627	2.0362	2.0484	2.1985	2.0665	2.0643	2.186	2.0725	2.0294	1.9728	2.1109	2.0044	2.054	2.0645	2.1064
pos_7364	2-(Ethoxymethyl)furan	metab_7363	-	-	-	HMDB0040445	pos	-	-	-	-	Organoheterocyclic compounds	Heteroaromatic compounds	91.0547	M+H-2H2O	C7H10O2	1.7153	0.165617	-	90.6	4.04056	6270-56-0	Not Available	1.8412	1.8607	1.9001	1.8558	1.8446	1.8226	1.8717	1.9452	1.9526	1.8915	1.8282	1.7941	1.8052	1.892	1.7541
pos_7368	P-Mentha-1,3,8-triene	metab_7367	-	-	-	HMDB0037013	pos	-	-	-	-	Lipids and lipid-like molecules	Prenol lipids	135.116	M+H	C10H14	1.6549	0.21023	74.5	-	-3.98324	18368-95-1	Monoterpenoids	1.9361	1.9665	1.9686	1.9561	1.9848	1.9456	2.0156	2.0828	2.0988	2.0982	1.957	1.9701	1.9376	2.0093	1.8251
pos_7373	(Z)-4-Hepten-1-ol	metab_7372	-	-	-	LMFA05000571;HMDB0031405	pos	-	-	-	-	Lipids and lipid-like molecules	Fatty Acyls	115.111	M+H	C7H14O	1.6146	0.245315	-	95.1	-2.20415	6191-71-5	Fatty alcohols	2.2785	2.2586	2.2999	2.2687	2.2598	2.2571	2.3485	2.4099	2.3851	2.3437	2.2738	2.2573	2.1988	2.3289	2.1243
pos_7376	Toluene	metab_7375	map01100	Metabolic pathways	C01455	HMDB0034168	pos	-	-	Metabolism	Global and overview maps	Benzenoids	Benzene and substituted derivatives	93.0702	M+H	C7H8	1.5848	0.118067	55.7	-	3.39494	108-88-3	Toluenes	1.6354	1.5633	1.5684	1.6519	1.5884	1.6395	1.7288	1.6857	1.7026	1.7103	1.5951	1.5529	1.5845	1.6713	1.5901
pos_7381	Niazirinin	metab_7380	-	-	-	HMDB0032808	pos	-	-	-	-	Organic oxygen compounds	Organooxygen compounds	339.155	M+NH4	C16H19NO6	1.4788	0.0749227	-	70.8	-0.561752	159397-73-6	Carbohydrates and carbohydrate conjugates	2.7235	2.6418	2.058	2.5213	3.2693	2.5889	3.2224	2.6716	2.7126	2.7	2.6732	3.0323	2.8387	2.8476	2.8979
pos_7384	N-(1-Deoxy-1-fructosyl)tyrosine	metab_7383	-	-	-	HMDB0037845	pos	-	-	-	-	Organic acids and derivatives	Carboxylic acids and derivatives	344.134	M+H	C15H21NO8	1.3776	0.218032	-	64.2	-0.539264	34393-22-1	Amino acids, peptides, and analogues	1.2929	1.4068	0.6616	1.1489	1.4882	1.2197	1.6532	1.2648	1.4215	1.2145	1.4829	1.5235	1.4541	1.3777	1.5581
pos_7386	Limonene-1,2-epoxide	metab_7385	-	-	C07271	LMPR0102090015	pos	-	-	-	-	-	-	153.127	M+H	C10H16O	1.367	0.285011	60.6	-	-4.39596	-	-	2.1914	2.1589	2.1726	2.1893	2.1866	2.2288	2.2788	2.3013	2.2809	2.3899	2.2215	2.1411	2.1748	2.295	2.0453
pos_7388	O-Cymene	metab_7387	-	-	-	-	pos	-	-	-	-	-	-	135.116	M+H	C10H14	1.3366	0.247628	63.5	-	-3.91122	-	-	1.8331	1.8088	1.7542	1.8025	1.8219	1.8194	1.8961	1.9303	1.9367	2.0261	1.8359	1.7526	1.8276	1.9126	1.695
pos_7392	Dinorpromazine	metab_7391	-	-	-	-	pos	-	-	-	-	-	-	257.113	M+H	C15H16N2S	1.285	0.114167	78.4	-	8.13631	-	-	1.4261	1.4768	1.2063	1.2399	1.351	1.2422	1.3133	1.4109	1.5119	1.6648	1.4483	1.4547	1.3797	1.473	1.414
pos_7396	Blepharin	metab_7395	-	-	-	HMDB0029344	pos	-	-	-	-	Organic oxygen compounds	Organooxygen compounds	372.064	M+2Na-H	C14H17NO8	1.1956	0.0864817	-	50.5	-7.03111	27625-86-1	Carbohydrates and carbohydrate conjugates	1.3186	1.2253	0.7924	1.6672	1.2165	1.4745	1.4799	1.2	1.4487	0.721	1.0008	1.6963	1.4484	1.4403	1.5055
pos_7397	Casuarine 6-alpha-D-glucoside	metab_7396	-	-	-	HMDB0031999	pos	-	-	-	-	Organic oxygen compounds	Organooxygen compounds	400.182	M+CH3OH+H	C14H25NO10	1.1956	0.113083	-	67.1	1.60799	186795-20-0	Carbohydrates and carbohydrate conjugates	1.5478	1.4484	0.9677	1.7829	1.3003	1.6856	1.7947	1.5508	1.6234	1.1622	1.366	1.8038	1.6459	1.6078	1.5496
pos_7400	N-(1-Deoxy-1-fructosyl)threonine	metab_7399	-	-	-	HMDB0037843	pos	-	-	-	-	Organic oxygen compounds	Organooxygen compounds	314.146	M+CH3OH+H	C10H19NO8	1.1756	0.231366	-	61.7	3.37045	70954-04-0	Carbohydrates and carbohydrate conjugates	1.8528	1.7686	1.4658	1.9478	1.7423	1.9995	1.8805	1.8905	1.7442	1.8538	1.6891	1.7951	1.8101	1.863	1.6608
pos_7401	2-Pyrrolidinone	metab_7400	-	-	C11118	HMDB0002039	pos	-	-	-	-	Organoheterocyclic compounds	Pyrrolidines	86.0601	M+H	C4H7NO	1.1651	0.161433	-	55	0.932138	616-45-5	Pyrrolidones	1.553	1.5626	1.7802	1.5602	1.4888	1.4151	1.2171	1.4379	1.4307	1.5515	1.6828	1.5283	1.6702	1.5767	1.5414
pos_7402	Guanine	metab_7401	map01100;map00230	Metabolic pathways;Purine metabolism	C00242	HMDB0000132	pos	Nucleic acids	Bases	Metabolism;Metabolism	Global and overview maps;Nucleotide metabolism	Organoheterocyclic compounds	Imidazopyrimidines	152.056	M+H	C5H5N5O	1.1555	0.0531036	85	-	-4.321	73-40-5	Purines and purine derivatives	1.8637	1.8346	1.5658	1.8502	1.8124	1.8942	1.8112	1.8845	1.7578	1.6873	1.6283	1.7763	1.7848	1.8292	1.8172
pos_7403	Guanosine	metab_7402	map01100;map00230	Metabolic pathways;Purine metabolism	C00387	HMDB0000133	pos	Nucleic acids	Nucleosides	Metabolism;Metabolism	Global and overview maps;Nucleotide metabolism	Nucleosides, nucleotides, and analogues	Purine nucleosides	284.099	M+H	C10H13N5O5	1.1448	0.0210276	89.4	-	-1.44151	118-00-3	Not Available	2.6296	2.6319	2.3595	2.6283	2.5873	2.7014	2.5906	2.6397	2.6042	2.3367	2.3352	2.5657	2.5553	2.5727	2.5595
pos_7407	Xi-4-Hydroxy-4-methyl-2-cyclohexen-1-one	metab_7406	-	-	-	HMDB0033629	pos	-	-	-	-	Organic oxygen compounds	Organooxygen compounds	91.0547	M+H-2H2O	C7H10O2	1.0618	0.157117	-	91.3	3.43566	-	Carbonyl compounds	1.2536	1.4015	1.3343	1.2804	1.3071	1.279	1.3909	1.2328	1.3049	1.3732	1.3715	1.3633	1.3314	1.4232	1.3016
pos_7426	Nicotyrine	metab_7425	-	-	C10161	-	pos	-	-	-	-	-	-	159.091	M+H	C10H10N2	0.7835	0.194362	56.3	-	-5.33288	-	-	1.9432	2.0434	1.9491	1.5662	1.6587	1.7282	1.6841	1.8584	2.0199	1.2866	1.575	1.4197	1.6222	1.5962	1.7448
pos_7453	2-Hydroxycinnamic acid	metab_7452	map00360	Phenylalanine metabolism	C01772	HMDB0002641	pos	-	-	Metabolism	Amino acid metabolism	Phenylpropanoids and polyketides	Cinnamic acids and derivatives	165.054	M+H	C9H8O3	0.754	0.108523	73.3	-	-5.11346	583-17-5	Hydroxycinnamic acids and derivatives	2.7161	2.757	2.7349	2.6535	2.6284	2.6984	2.5862	2.6999	2.6789	2.4597	2.444	2.4836	2.5682	2.6602	2.6027
pos_7459	Sterebin E	metab_7458	-	-	-	HMDB0035379	pos	-	-	-	-	Lipids and lipid-like molecules	Prenol lipids	361.233	M+Na	C20H34O4	0.724	0.135731	-	59.3	-5.49449	114343-74-7	Diterpenoids	1.7369	1.594	1.4451	1.0947	2.2352	1.6728	1.6581	1.6384	0.373	0.3486	0.9049	1.7436	1.6643	1.6327	1.5496
pos_7465	Hypoxanthine	metab_7464	map01100;map00230	Metabolic pathways;Purine metabolism	C00262	HMDB0000157	pos	-	-	Metabolism;Metabolism	Global and overview maps;Nucleotide metabolism	Organoheterocyclic compounds	Imidazopyrimidines	137.045	M+H	C5H4N4O	0.7441	0.0320473	88.7	-	-3.66194	68-94-0	Purines and purine derivatives	3.0447	3.0336	2.9922	3.1318	2.9623	3.1479	2.9747	3.0617	3.0166	2.8351	2.9323	3.0222	2.9718	2.9931	2.9672
pos_7469	Uracil	metab_7468	map00240;map01100;map00770;map00410	Pyrimidine metabolism;Metabolic pathways;Pantothenate and CoA biosynthesis;beta-Alanine metabolism	C00106	HMDB0000300	pos	Nucleic acids	Bases	Metabolism;Metabolism;Metabolism;Metabolism	Nucleotide metabolism;Global and overview maps;Metabolism of cofactors and vitamins;Metabolism of other amino acids	Organoheterocyclic compounds	Diazines	113.034	M+H	C4H4N2O2	0.7335	0.289565	94.4	-	-1.90597	66-22-8	Pyrimidines and pyrimidine derivatives	1.726	1.7678	1.7376	1.5286	1.6166	1.4517	1.6829	1.6499	1.6397	1.8735	1.7316	1.3099	1.6014	1.6919	1.8406
pos_7475	Coumestrin	metab_7474	-	-	-	HMDB0033587	pos	-	-	-	-	Phenylpropanoids and polyketides	Isoflavonoids	395.079	M+H-2H2O	C21H18O10	0.7045	0.170988	-	69.6	7.77479	92631-72-6	Coumestans	1.7043	1.5877	0.8951	0.8414	1.6458	1.4918	1.4986	1.5455	1.7865	1.4627	1.3279	1.336	1.5321	1.4421	1.3935
pos_7476	L-Gizzerosine	metab_7475	-	-	-	HMDB0039160	pos	-	-	-	-	Organic acids and derivatives	Carboxylic acids and derivatives	273.191	M+CH3OH+H	C11H20N4O2	0.7045	0.0973582	-	70.7	-3.35525	89238-78-8	Amino acids, peptides, and analogues	1.563	1.9307	1.9172	1.3019	1.5454	1.2703	1.593	1.9019	1.4806	2.0207	1.908	1.1594	1.6616	1.7317	1.6619
pos_7477	Pseudouridine	metab_7476	map00240	Pyrimidine metabolism	C02067	HMDB0000767	pos	-	-	Metabolism	Nucleotide metabolism	Nucleosides, nucleotides, and analogues	Nucleoside and nucleotide analogues	209.055	M+H-2H2O	C9H12N2O6	0.7045	0.230122	-	64.1	-3.86694	1445-07-4	Not Available	1.5219	1.6177	1.4384	1.5091	1.4583	1.3989	1.4533	1.6551	1.5833	1.7675	1.575	1.4801	1.3894	1.5854	1.5455
pos_7478	(S)-carnitinium	metab_7477	-	-	-	HMDB0062634	pos	-	-	-	-	Organic nitrogen compounds	Organonitrogen compounds	347.218	2M+Na	C7H16NO3+	0.6947	0.223912	-	62.7	7.39007	-	Quaternary ammonium salts	1.6732	1.488	1.2674	0.5053	1.6905	1.2033	1.5115	1.396	0.6992	0.0828	0.5865	1.4191	1.28	1.4703	1.4201
pos_7480	Acaciabiuronic acid	metab_7479	-	-	-	HMDB0029938	pos	-	-	-	-	Organic oxygen compounds	Organooxygen compounds	401.067	M+2Na-H	C12H20O12	0.6853	0.0611363	-	87.2	-0.171611	7264-19-9	Carbohydrates and carbohydrate conjugates	1.4072	1.355	1.2216	1.5961	1.7758	1.488	1.5943	1.1992	1.7104	1.2659	1.058	1.6713	1.4705	1.4219	1.4623
pos_7481	Isoleucyl-Isoleucine	metab_7480	-	-	-	HMDB0028910	pos	-	-	-	-	Organic acids and derivatives	Carboxylic acids and derivatives	286.212	M+ACN+H	C12H24N2O3	0.6853	0.0638325	-	77.7	-0.955897	-	Amino acids, peptides, and analogues	1.6354	2.1892	1.9116	1.4846	1.9398	1.4363	1.2617	2.0421	1.7915	2.1285	2.1094	1.2238	1.7887	1.8434	1.8181
pos_7485	Asparaginyl-Valine	metab_7484	-	-	-	HMDB0028744	pos	-	-	-	-	Organic acids and derivatives	Carboxylic acids and derivatives	249.155	M+NH4	C9H17N3O4	0.6753	0.0583789	-	80.3	-2.71583	-	Amino acids, peptides, and analogues	1.5449	1.7926	1.8399	1.8021	2.1626	1.8785	2.3124	2.0066	2.2086	1.7702	1.7889	2.2047	2.106	2.1397	2.091
pos_7492	(1RS,2RS)-Guaiacylglycerol 1-glucoside	metab_7491	-	-	-	HMDB0033300	pos	-	-	-	-	Organic oxygen compounds	Organooxygen compounds	409.17	M+CH3OH+H	C16H24O10	0.6563	0.144711	-	68.2	-1.72434	-	Carbohydrates and carbohydrate conjugates	1.6791	1.5518	1.9841	1.9479	1.2753	1.674	1.0709	1.9222	1.8635	1.6004	1.9795	1.386	1.4843	1.566	1.4501
pos_7494	Alanyl-Proline	metab_7493	-	-	-	HMDB0028695	pos	-	-	-	-	Organic acids and derivatives	Carboxylic acids and derivatives	219.134	M+CH3OH+H	C8H14N2O3	0.6563	0.109674	-	72.2	-1.73003	-	Amino acids, peptides, and analogues	1.5549	1.2521	0.9966	1.6809	1.402	1.7381	1.518	1.2774	1.5455	1.188	1.3885	1.7137	1.3995	1.4695	1.3864
pos_7500	L-Glutamine	metab_7499	map01100;map00630;map00220;map00230;map04964;map00471;map02010;map00910;map04978;map01230;map00240;map00250;map04974;map00970;map04727;map05230;map04724	Metabolic pathways;Glyoxylate and dicarboxylate metabolism;Arginine biosynthesis;Purine metabolism;Proximal tubule bicarbonate reclamation;D-Glutamine and D-glutamate metabolism;ABC transporters;Nitrogen metabolism;Mineral absorption;Biosynthesis of amino acids;Pyrimidine metabolism;Alanine, aspartate and glutamate metabolism;Protein digestion and absorption;Aminoacyl-tRNA biosynthesis;GABAergic …	C00064	HMDB0000641	pos	Peptides	Amino acids	Metabolism;Metabolism;Metabolism;Metabolism;Organismal Systems;Metabolism;Environmental Information Processing;Metabolism;Organismal Systems;Metabolism;Metabolism;Metabolism;Organismal Systems;Genetic Information Processing;Organismal Systems;Human Diseases;Organismal Systems	Global and overview maps;Carbohydrate metabolism;Amino acid metabolism;Nucleotide metabolism;Excretory system;Metabolism of other amino acids;Membrane transport;Energy metabolism;Digestive system;Global and overview maps;Nucleotide metabolism;Amino acid metabolism;Digestive system;Translation;Nervous system;Cancers: Overview;Nervous system	Organic acids and derivatives	Carboxylic acids and derivatives	147.076	M+H	C5H10N2O3	0.647	0.0770208	87.1	-	-4.93853	56-85-9	Amino acids, peptides, and analogues	1.547	1.5727	1.5174	1.7026	1.6318	1.7366	1.8108	1.8315	1.7785	1.8356	1.6241	1.8694	1.7188	1.6723	1.737
pos_7508	Isoputreanine	metab_7507	-	-	-	HMDB0006009	pos	-	-	-	-	Organic acids and derivatives	Carboxylic acids and derivatives	193.154	M+CH3OH+H	C7H16N2O2	0.6372	0.150294	-	83.3	-3.95386	66165-33-1	Amino acids, peptides, and analogues	1.8151	1.8317	1.61	0.9975	1.8743	1.4291	2.3073	1.2152	1.4783	1.8036	1.1727	2.1863	2.0609	2.1684	2.0598
pos_7512	Creatine	metab_7511	map01100;map00330;map00260	Metabolic pathways;Arginine and proline metabolism;Glycine, serine and threonine metabolism	C00300	HMDB0000064	pos	-	-	Metabolism;Metabolism;Metabolism	Global and overview maps;Amino acid metabolism;Amino acid metabolism	Organic acids and derivatives	Carboxylic acids and derivatives	154.058	M+Na	C4H9N3O2	0.6278	0.217197	-	89	-5.61768	57-00-1	Amino acids, peptides, and analogues	2.0296	2.1888	1.9487	2.2038	2.334	2.2501	2.2369	2.2171	2.2528	1.8166	2.1891	2.3267	2.2711	2.3232	2.4482
pos_7516	Choline	metab_7515	map01100;map00564;map02010;map04976;map00260;map04725;map05231	Metabolic pathways;Glycerophospholipid metabolism;ABC transporters;Bile secretion;Glycine, serine and threonine metabolism;Cholinergic synapse;Choline metabolism in cancer	C00114	HMDB0000097	pos	-	-	Metabolism;Metabolism;Environmental Information Processing;Organismal Systems;Metabolism;Organismal Systems;Human Diseases	Global and overview maps;Lipid metabolism;Membrane transport;Digestive system;Amino acid metabolism;Nervous system;Cancers: Overview	Organic nitrogen compounds	Organonitrogen compounds	104.107	M+H	C5H13NO	0.6178	0.0501516	66.3	-	-1.77389	62-49-7	Quaternary ammonium salts	2.6842	2.7529	2.8048	2.7716	2.7068	2.8414	2.6319	2.8171	2.7836	2.7338	2.7615	2.6862	2.8046	2.7852	2.761
pos_7675	{[1-hydroxy-1-(1-oxo-1H-isochromen-3-yl)but-3-en-2-yl]oxy}sulfonic acid	metab_7674	-	-	-	HMDB0130094	pos	-	-	-	-	Phenylpropanoids and polyketides	Isocoumarins and derivatives	313.036	M+H	C13H12O7S	0.5352	0.0341035	-	82.6	-6.50678	-	Not Available	1.9096	1.7979	1.6132	1.8114	1.534	1.7383	1.8831	1.8192	1.8499	1.7486	1.5165	1.7649	1.7246	1.7034	1.6971
pos_7679	N-(1-Deoxy-1-fructosyl)proline	metab_7678	-	-	-	HMDB0038493	pos	-	-	-	-	Organoheterocyclic compounds	Benzodioxanes	295.15	M+NH4	C11H19NO7	0.5147	0.0354238	-	59.4	-1.54293	29118-61-4	Phenylbenzodioxanes	1.7074	1.6553	1.3972	1.6745	2.012	1.5451	2.2512	1.5716	1.5531	1.7356	1.8392	1.9581	1.8663	1.858	1.8367
pos_7681	4-Pyrimidine Methanamine (hydrochloride)	metab_7680	-	-	-	-	pos	-	-	-	-	-	-	110.071	M+H	C5H7N3	0.5147	0.0267018	82.1	-	-0.290148	-	-	1.6841	1.7546	1.7268	1.6844	1.7074	1.7095	1.7044	1.6726	1.7391	1.5815	1.6208	1.8059	1.7048	1.7089	1.7261
pos_7685	1-Isopropyl-3-methylbenzene	metab_7684	-	-	-	HMDB0037051	pos	-	-	-	-	Benzenoids	Benzene and substituted derivatives	135.116	M+H	C10H14	0.4497	0.220121	53.9	-	-3.58225	535-77-3	Cumenes	2.1722	2.1593	2.2126	2.1875	2.1866	2.2127	2.2684	2.2693	2.3149	2.2909	2.1628	2.1415	2.1424	2.2394	2.0488
pos_7696	Decyl alcohol	metab_7695	-	-	C01633	HMDB0011624	pos	-	-	-	-	Lipids and lipid-like molecules	Fatty Acyls	191.2	M+CH3OH+H	C10H22O	0.1626	0.265609	-	97	-3.78888	112-30-1	Fatty alcohols	2.2594	2.242	2.304	2.2641	2.2052	2.2909	2.3382	2.3349	2.384	2.3369	2.2105	2.1544	2.2491	2.3307	2.0931
pos_7702	(S)-(-)-Perillyl alcohol	metab_7701	-	-	C02452	-	pos	-	-	-	-	-	-	135.116	M+H-H2O	C10H16O	0.0787	0.283254	78.3	-	-2.88118	-	-	1.5167	1.4999	1.4903	1.4828	1.528	1.5533	1.5567	1.622	1.6082	1.6525	1.5547	1.4131	1.4394	1.615	1.404
neg_8	Hexadecanedioic acid	metab_7713	map01100	Metabolic pathways	C08260;C19615	HMDB0000672;LMFA01170022	neg	-	-	Metabolism	Global and overview maps	Lipids and lipid-like molecules	Fatty Acyls	285.206	M-H, M+Na-2H, M+K-2H, M+Cl, M-H2O-H	C16H30O4	7.6901	0.00556744	69.9	-	-4.23461	505-54-4	Fatty acids and conjugates	3.4716	3.5212	2.8391	3.1995	2.9899	2.6782	4.325	2.6283	3.669	2.533	4.3206	3.0673	3.8431	3.839	3.8388
neg_28	C75	metab_7733	-	-	-	-	neg	-	-	-	-	-	-	253.144	M-H, M+K-2H, M+Na-2H, M-H2O-H	C14H22O4	6.1925	0.0417163	56.4	-	-3.08613	-	-	3.4303	3.5067	3.3531	3.909	3.1169	2.6953	4.1087	2.9504	4.056	2.8969	4.2004	3.2395	3.7871	3.7623	3.7522
neg_32	(6E,8R,10Z)-8-hydroxy-3-oxohexadecadienoic acid	metab_7737	-	-	-	HMDB0062365	neg	-	-	-	-	Lipids and lipid-like molecules	Fatty Acyls	281.175	M-H, M+K-2H, M+Na-2H, M-H2O-H	C16H26O4	7.0167	0.0299361	-	54	-3.79776	2190485-67-5	Fatty acids and conjugates	3.0809	3.1649	2.582	3.0262	2.6173	2.2749	3.9302	2.3666	3.5906	2.2325	4.1211	2.618	3.4779	3.4628	3.4887
neg_37	12(R)-HETE	metab_7742	map00590;map01100;map04925	Arachidonic acid metabolism;Metabolic pathways;Aldosterone synthesis and secretion	C14822	-	neg	-	-	Metabolism;Metabolism;Organismal Systems	Lipid metabolism;Global and overview maps;Endocrine system	-	-	319.226	M-H, M+Cl, 2M-H, M-H2O-H	C20H32O3	8.1279	0.0613053	63.7	-	-5.31515	-	-	3.6141	3.61	3.6333	3.8464	3.5991	4.0012	3.9828	3.9273	3.9021	3.7698	3.783	3.5973	3.7824	3.822	3.7723
neg_62	N-Acetyl-7-O-acetylneuraminic acid	metab_7767	-	-	C04016	HMDB0000785	neg	-	-	-	-	Organic oxygen compounds	Organooxygen compounds	372.105	M-H, M+Na-2H, M+FA-H	C13H21NO10	0.7374	0.0360417	-	96.2	-6.72657	18529-63-0	Carbohydrates and carbohydrate conjugates	2.5875	2.7164	2.4389	2.5103	2.5591	2.714	2.4324	2.6369	2.6808	2.717	2.3667	2.4931	2.6083	2.5916	2.5771
neg_137	12S-HHTrE	metab_7842	-	-	-	LMFA03050002	neg	-	-	-	-	-	-	279.195	M+Cl, M+FA-H, M-H	C17H28O3	7.3683	0.0158542	58.6	-	-3.81436	-	-	3.106	3.0829	3.0359	3.3116	3.0312	3.3581	3.2879	3.3601	3.3869	3.1969	3.1333	3.1039	3.1887	3.1969	3.1832
neg_148	Deoxycholic acid	metab_7853	map04976	Bile secretion	C04483	HMDB0000626;LMST04010040	neg	Steroids	24-Carbon atoms	Organismal Systems	Digestive system	Lipids and lipid-like molecules	Steroids and steroid derivatives	437.289	M-H, M+Cl, M+FA-H	C24H40O4	7.843	0.0589796	78.3	-	-5.07802	83-44-3	Bile acids, alcohols and derivatives	4.6467	4.6923	4.5164	4.617	4.7702	4.4763	4.5806	4.4763	4.6024	4.5885	4.3053	4.5494	4.6242	4.5731	4.5975
neg_157	12alpha-hydroxy-3-oxo-5beta-cholan-24-oic Acid	metab_7862	-	-	-	LMST04010168;HMDB0062742	neg	-	-	-	-	Lipids and lipid-like molecules	Steroids and steroid derivatives	435.273	M-H, M+FA-H, M+Cl	C24H38O4	7.3396	0.0203391	-	51.4	-4.9882	4185-01-07	Bile acids, alcohols and derivatives	3.727	3.6446	3.636	3.727	3.8579	3.774	3.7614	3.5778	3.7761	3.5003	3.4021	3.4591	3.6613	3.6585	3.6749
neg_171	MEDICA 16	metab_7876	-	-	-	-	neg	-	-	-	-	-	-	341.268	M-H2O-H, M+Na-2H, M-H	C20H38O4	8.9261	0.0136357	56	-	-7.91426	-	-	3.2385	3.3061	2.7453	3.3383	3.2133	2.8938	3.6422	2.7748	3.4585	2.616	3.6141	2.7068	3.2594	3.2568	3.2481
neg_175	2-hydroxyhexadecanoic acid	metab_7880	-	-	-	HMDB0031057	neg	-	-	-	-	Lipids and lipid-like molecules	Fatty Acyls	271.227	M-H, M+FA-H, 2M-H	C16H32O3	9.0955	0.0536304	72.1	-	-4.12299	16452-51-0	Fatty acids and conjugates	3.7209	3.7861	3.6699	3.6209	3.837	3.6927	3.854	3.6224	3.8115	3.7077	3.8518	3.7442	3.7776	3.731	3.7578
neg_178	8,11-eicosadiynoic acid	metab_7883	-	-	-	LMFA01030688	neg	-	-	-	-	-	-	303.232	M-H, 2M-H, M+FA-H	C20H32O2	9.2532	0.01275	63.8	-	-4.10376	-	-	4.2783	4.5136	4.4711	4.6023	4.4153	4.4882	4.5491	4.5156	4.5842	4.4918	4.5156	4.6362	4.5021	4.5003	4.4917
neg_214	D-Fructose	metab_7919	map01100;map04973;map02010;map00051;map00052;map00500;map04742;map04931	Metabolic pathways;Carbohydrate digestion and absorption;ABC transporters;Fructose and mannose metabolism;Galactose metabolism;Starch and sucrose metabolism;Taste transduction;Insulin resistance	C00795;C10906;C05003;C00095	HMDB0000660	neg	Carbohydrates;-;-;Carbohydrates	Monosaccharides;-;-;Monosaccharides	Metabolism;Organismal Systems;Environmental Information Processing;Metabolism;Metabolism;Metabolism;Organismal Systems;Human Diseases	Global and overview maps;Digestive system;Membrane transport;Carbohydrate metabolism;Carbohydrate metabolism;Carbohydrate metabolism;Sensory system;Endocrine and metabolic diseases	Organic oxygen compounds	Organooxygen compounds	179.056	M-H, M+FA-H, M-H2O-H	C6H12O6	0.6076	0.0698181	52.5	-	-1.71467	53188-23-1	Carbohydrates and carbohydrate conjugates	2.8091	2.9387	2.84	2.8065	2.9059	2.9297	2.8451	2.9018	2.9513	3.0615	2.8301	2.9276	2.9015	2.9565	2.9093
neg_297	Aspartyl-Glutamate	metab_8002	-	-	-	HMDB0028752	neg	-	-	-	-	Organic acids and derivatives	Carboxylic acids and derivatives	243.061	M-H2O-H, M+Na-2H	C9H14N2O7	0.6614	0.0858518	-	51.9	-2.9037	-	Amino acids, peptides, and analogues	2.6622	2.8293	2.7362	2.8393	2.7377	2.7564	2.6686	2.8109	2.8826	2.9339	2.7823	2.7884	2.8277	2.7533	2.7886
neg_312	3,5,6-Trihydroxy-5-(hydroxymethyl)-2-methoxy-2-cyclohexen-1-one	metab_8017	-	-	-	HMDB0041031	neg	-	-	-	-	Organic oxygen compounds	Organooxygen compounds	239.058	M-H2O-H, M+Cl	C8H12O6	3.2422	0.108938	-	51.6	4.6284	76663-30-4	Carbonyl compounds	2.181	2.3651	2.4781	2.1864	2.0921	2.2282	2.1724	2.2723	2.2537	2.2013	2.4534	2.3028	2.2252	2.315	2.2512
neg_362	1-Nitro-5-glutathionyl-6-hydroxy-5,6-dihydronaphthalene	metab_8067	map00980	Metabolism of xenobiotics by cytochrome P450	C14806	HMDB0060326	neg	-	-	Metabolism	Xenobiotics biodegradation and metabolism	Organic acids and derivatives	Carboxylic acids and derivatives	541.131	M-H, M+FA-H	C20H24N4O9S	4.2335	0.049823	-	69.9	1.04727	-	Amino acids, peptides, and analogues	1.5726	1.5232	1.344	1.6935	1.6745	1.4932	1.6806	1.5758	1.6443	1.7819	1.5025	1.2709	1.6098	1.6264	1.5843
neg_394	3-Hydroxydodecanedioic acid	metab_8099	-	-	-	HMDB0000413	neg	-	-	-	-	Organic acids and derivatives	Hydroxy acids and derivatives	245.139	M-H, M+Na-2H	C12H22O5	4.82	0.0736731	-	65.6	-3.52536	34574-69-1	Medium-chain hydroxy acids and derivatives	1.9157	1.8798	1.6753	1.9075	1.9576	1.9306	2.3043	1.5863	2.0243	1.6228	2.3853	1.8699	1.949	2.0024	1.9483
neg_395	10,11-dihydro-20-dihydroxy-LTB4	metab_8100	-	-	-	LMFA03020043;HMDB0012502	neg	-	-	-	-	Lipids and lipid-like molecules	Fatty Acyls	369.226	M-H, M+Cl	C20H34O6	4.8296	0.113941	-	52.8	-4.94934	-	Eicosanoids	1.7008	1.7553	1.6336	1.6729	1.5943	1.4956	1.6857	1.7553	1.8919	1.7338	1.814	1.8418	1.64	1.7245	1.6463
neg_399	Sebacic acid	metab_8104	-	-	C08277	HMDB0000792;LMFA01170006	neg	-	-	-	-	Lipids and lipid-like molecules	Fatty Acyls	201.113	M-H, M+Na-2H	C10H18O4	4.8676	0.0769216	-	51.8	-1.69962	111-20-6	Fatty acids and conjugates	2.0861	1.8577	1.7361	2.2045	2.0572	2.0007	2.0319	1.8237	2.3133	2.2329	1.9046	1.5467	1.9414	1.9787	1.9132
neg_411	3-Hydroxytetradecanedioic acid	metab_8116	-	-	-	HMDB0000394	neg	-	-	-	-	Lipids and lipid-like molecules	Fatty Acyls	273.17	M-H, M+Na-2H	C14H26O5	5.1146	0.0740497	-	58.7	-4.07482	73179-89-2	Fatty acids and conjugates	2.1975	1.9282	1.4414	2.1659	2.2126	2.4111	2.3649	1.7324	2.1429	1.6082	2.1917	2.2205	2.1456	2.1267	2.0825
neg_433	3,4-Methylenesebacic acid	metab_8138	-	-	-	HMDB0059729	neg	-	-	-	-	Lipids and lipid-like molecules	Fatty Acyls	225.113	M-H, M+Na-2H	C12H18O4	5.4006	0.0130623	-	71.7	-2.74305	-	Fatty acids and conjugates	2.4789	2.4621	2.3461	2.8	2.2142	1.9654	3.0568	1.9982	2.9635	2.0164	3.1785	2.4703	2.6837	2.6735	2.6829
neg_439	(±)-Enterolactone	metab_8144	-	-	-	-	neg	-	-	-	-	-	-	297.113	M-H, M+FA-H	C18H18O4	5.5731	0.126378	70.7	-	-1.94329	-	-	1.3363	1.6867	1.4113	1.2341	1.3192	1.3532	0.9562	1.1413	1.6182	1.3601	1.3145	1.3303	1.3739	1.2709	1.3128
neg_440	Undecanedioic acid	metab_8145	-	-	-	LMFA01170007;HMDB0000888	neg	-	-	-	-	Lipids and lipid-like molecules	Fatty Acyls	215.128	M-H, M+Na-2H	C11H20O4	5.5731	0.0321745	-	54.7	-3.24887	1852-04-6	Fatty acids and conjugates	2.2507	2.2009	2.1916	2.3943	2.2258	2.2469	2.4852	2.1686	2.3475	2.1729	2.5732	2.0547	2.327	2.3057	2.3012
neg_455	12,20-DiHETE	metab_8160	-	-	-	HMDB0060105	neg	-	-	-	-	Lipids and lipid-like molecules	Fatty Acyls	373.167	M-H, M+K-2H	C20H32O4	5.7846	0.0268179	-	58.2	-5.57932	-	Eicosanoids	2.4542	2.5774	2.4993	2.2072	2.5023	2.4143	2.4807	2.3968	2.3655	2.6925	2.3961	1.9562	2.4434	2.4621	2.4411
neg_472	Neosaxitoxin	metab_8177	-	-	C17208	HMDB0029369	neg	-	-	-	-	Phenylpropanoids and polyketides	Saxitoxins, gonyautoxins, and derivatives	314.123	M-H, M+Na-2H	C10H17N7O5	5.9671	0.0629554	-	56.9	3.74619	64296-20-4	Not Available	1.4667	1.3227	1.375	1.9523	0.9396	0.2045	2.0549	0.9453	2.107	0.9542	2.2623	0.8662	1.734	1.7417	1.7832
neg_510	1alpha-Hydroxyarbusculin A	metab_8215	-	-	-	HMDB0037059	neg	-	-	-	-	Lipids and lipid-like molecules	Prenol lipids	265.143	M-H, M+Na-2H	C15H22O4	6.4012	0.00839876	-	64.3	-4.2571	50301-94-5	Terpene lactones	2.5605	2.6595	2.6146	2.7818	2.6118	2.4739	2.9357	2.4662	2.8618	2.5394	2.945	2.502	2.6847	2.6781	2.684
neg_532	4,11,13,15-Tetrahydroridentin B	metab_8237	-	-	-	HMDB0036150	neg	-	-	-	-	Lipids and lipid-like molecules	Prenol lipids	267.159	M-H, M+Na-2H	C15H24O4	6.7037	0.0274227	-	66.7	-3.62879	75991-58-1	Terpene lactones	2.4313	2.5524	2.3217	2.5205	2.355	2.1408	3.096	2.2298	2.9422	2.2577	3.2686	2.151	2.7078	2.7187	2.6949
neg_554	Sulfolithocholylglycine	metab_8259	-	-	C11301	HMDB0002639	neg	-	-	-	-	Lipids and lipid-like molecules	Steroids and steroid derivatives	512.267	M-H, M+Na-2H	C26H43NO7S	6.9495	0.0267298	-	50.7	-3.40265	15324-64-8	Bile acids, alcohols and derivatives	2.3772	2.5842	2.0999	1.9162	2.5191	2.1363	2.8417	2.7145	2.5208	2.6648	2.7694	2.0222	2.5284	2.5363	2.5511
neg_571	Diplodiatoxin	metab_8276	-	-	-	HMDB0031471	neg	-	-	-	-	Organic acids and derivatives	Keto acids and derivatives	307.19	M-H, M+Na-2H	C18H28O4	7.2635	0.0479601	-	56.1	-4.64903	41060-01-9	Gamma-keto acids and derivatives	2.5285	2.4739	1.9927	2.295	1.9942	1.6534	3.2954	1.7793	2.7913	1.7448	3.4295	2.0145	2.7945	2.7984	2.8318
neg_595	LysoPC(18:3(9Z,12Z,15Z))	metab_8300	-	-	-	HMDB0010388	neg	-	-	-	-	Lipids and lipid-like molecules	Glycerophospholipids	562.312	M+Cl, M+FA-H	C26H48NO7P	7.6331	0.0848915	-	73.8	-4.43537	-	Glycerophosphocholines	3.1355	3.2567	3.375	3.0854	3.2956	3.3601	2.7323	3.3624	3.0492	3.4092	2.8806	3.0276	3.1542	3.1063	3.1799
neg_601	5(S)-HEPE	metab_8306	-	-	-	-	neg	-	-	-	-	-	-	317.211	M-H, M+FA-H	C20H30O3	7.7284	0.0700626	62.6	-	-3.49008	-	-	3.2077	2.1384	1.8944	2.0872	1.8814	2.0829	2.2379	1.9402	2.2176	1.8045	2.1632	2.1847	2.3504	2.3851	2.4112
neg_602	LysoPC(20:5(5Z,8Z,11Z,14Z,17Z))	metab_8307	map00564;map05231	Glycerophospholipid metabolism;Choline metabolism in cancer	C04230	HMDB0010397	neg	Lipids	Phospholipids	Metabolism;Human Diseases	Lipid metabolism;Cancers: Overview	Lipids and lipid-like molecules	Glycerophospholipids	586.313	M+Cl, M+FA-H	C28H48NO7P	7.7284	0.0450039	-	73.2	-3.86049	-	Glycerophosphocholines	2.8291	3.0691	3.0256	2.8423	3.0521	3.1536	2.4906	3.1455	2.7734	3.1698	2.7704	3.3364	2.9758	2.9837	3.0125
neg_617	(±)12(13)-EpOME	metab_8322	-	-	-	-	neg	-	-	-	-	-	-	295.227	M-H, M+Cl	C18H32O3	7.9278	0.0203936	64.8	-	-4.47701	-	-	3.796	3.3866	3.1995	3.3787	3.2322	3.1662	3.2974	3.2217	3.3677	3.2433	3.1561	3.4676	3.3226	3.3122	3.3299
neg_623	LysoPC(15:0)	metab_8328	map00564;map05231	Glycerophospholipid metabolism;Choline metabolism in cancer	C04230	HMDB0010381	neg	Lipids	Phospholipids	Metabolism;Human Diseases	Lipid metabolism;Cancers: Overview	Lipids and lipid-like molecules	Glycerophospholipids	526.313	M+Cl, M+FA-H	C23H48NO7P	8.0081	0.0360966	-	68.3	-5.81486	-	Glycerophosphocholines	3.2901	3.3561	3.4687	3.3851	3.4379	3.4595	3.1616	3.3706	3.3148	3.4207	3.1846	3.4161	3.3154	3.3403	3.3448
neg_665	15(S)-HpEDE	metab_8370	-	-	-	-	neg	-	-	-	-	-	-	339.252	M-H, M+Na-2H	C20H36O4	8.5532	0.0200873	52.4	-	-5.17433	-	-	2.5385	2.5602	1.8608	2.4967	2.2554	1.6597	3.327	1.8521	2.8541	1.4928	3.339	1.3927	2.7423	2.7302	2.7255
neg_688	LysoPC(17:0)	metab_8393	map00564;map05231	Glycerophospholipid metabolism;Choline metabolism in cancer	C04230	HMDB0012108	neg	Lipids	Phospholipids	Metabolism;Human Diseases	Lipid metabolism;Cancers: Overview	Lipids and lipid-like molecules	Glycerophospholipids	554.344	M+Cl, M+FA-H	C25H52NO7P	8.8229	0.0786823	-	72.8	-1.49064	-	Glycerophosphocholines	4.3212	4.3455	4.4689	4.3131	4.4133	4.4137	4.2745	4.3481	4.3811	4.3629	4.2504	4.4596	4.402	4.3465	4.3418
neg_718	7'-Carboxy-alpha-chromanol	metab_8423	-	-	-	HMDB0012848	neg	-	-	-	-	Organoheterocyclic compounds	Benzopyrans	347.221	M-H, M+Na-2H	C21H32O4	8.9261	0.0559969	-	58.6	-4.77284	-	1-benzopyrans	2.5895	2.0168	1.9632	2.0932	1.8125	1.6432	2.0937	1.9184	2.0847	1.8917	2.135	2.436	2.0926	2.1409	2.1174
neg_786	LysoPE(22:0/0:0)	metab_8491	-	-	-	HMDB0011520	neg	-	-	-	-	Lipids and lipid-like molecules	Glycerophospholipids	582.412	M-H2O-H, M+FA-H	C27H56NO7P	9.921	0.16226	-	54	-6.75829	-	Glycerophosphoethanolamines	2.4021	2.4217	2.2035	2.5985	2.5063	2.4932	2.3839	2.7428	2.5173	2.4896	2.267	2.3087	2.4952	2.353	2.4376
neg_799	Stearic Acid ethyl ester	metab_8504	-	-	-	-	neg	-	-	-	-	-	-	311.294	M-H, M+FA-H	C20H40O2	10.2716	0.185257	51.7	-	-5.75555	-	-	1.9209	1.9617	1.7412	2.0715	1.9479	1.7793	1.905	1.7248	2.1715	1.4886	1.9058	1.6473	1.8937	1.9095	1.7562
neg_801	PC(18:3(6Z,9Z,12Z)/20:4(5Z,8Z,11Z,14Z))	metab_8506	-	-	-	HMDB0008180;LMGP01011663	neg	-	-	-	-	Lipids and lipid-like molecules	Glycerophospholipids	848.545	M+Cl, M+FA-H	C46H78NO8P	10.2998	0.0578877	-	63.5	-2.49649	-	Glycerophosphocholines	2.6758	2.7121	2.6549	2.7585	2.936	2.8128	2.74	2.8295	2.6402	2.7176	2.9089	2.8884	2.8037	2.7545	2.7901
neg_813	PE(18:0/18:2(9Z,12Z))	metab_8518	-	-	-	HMDB0008994;LMGP02010044	neg	-	-	-	-	Lipids and lipid-like molecules	Glycerophospholipids	788.542	M+Cl, M+FA-H	C41H78NO8P	10.8969	0.0323364	-	59.7	1.63523	-	Glycerophosphoethanolamines	3.2872	3.3598	3.4212	3.4385	3.4789	3.4198	3.3171	3.2399	3.3939	3.322	3.3032	3.4055	3.3487	3.3269	3.3229
neg_940	LysoPC(22:4(7Z,10Z,13Z,16Z))	metab_8645	map00564;map05231	Glycerophospholipid metabolism;Choline metabolism in cancer	C04230	HMDB0010401	neg	Lipids	Phospholipids	Metabolism;Human Diseases	Lipid metabolism;Cancers: Overview	Lipids and lipid-like molecules	Glycerophospholipids	616.36	M+Cl, M+FA-H	C30H54NO7P	8.5902	0.0986598	-	78.8	-6.27142	-	Glycerophosphocholines	3.4343	3.4511	3.5304	3.2478	3.524	3.3836	3.2023	3.4369	3.5077	3.5324	3.2787	3.4706	3.4276	3.4456	3.3621
neg_951	PGA1	metab_8656	-	-	C04685	LMFA03010005	neg	Lipids	Eicosanoids	-	-	-	-	335.221	M-H, M+Na-2H	C20H32O4	7.9088	0.00867459	56.3	-	-4.98047	-	-	2.5973	2.5496	2.1577	2.3718	2.0704	1.8379	3.4417	1.9242	2.8452	1.7549	3.5066	2.0327	2.914	2.9066	2.9118
neg_961	20-carboxy Arachidonic Acid	metab_8666	-	-	-	-	neg	-	-	-	-	-	-	333.205	M-H, M+Na-2H	C20H30O4	7.586	0.0318819	75.2	-	-4.96744	-	-	3.0775	3.0001	2.6001	2.9615	2.5645	2.3601	3.8436	2.3545	3.2503	2.4457	3.7818	2.771	3.3029	3.2868	3.3144
neg_1023	Xi-7-Hydroxyhexadecanedioic acid	metab_8728	-	-	-	HMDB0037830	neg	-	-	-	-	Lipids and lipid-like molecules	Fatty Acyls	301.201	M-H, M+Na-2H	C16H30O5	6.9402	0.0300483	-	58.1	-4.57716	-	Fatty acids and conjugates	1.7344	1.7463	1.2827	1.3977	2.0612	1.7316	2.6851	1.1323	1.8684	0.9508	2.4552	1.6548	2.0121	2.0309	2.0371
neg_1033	Floionolic acid	metab_8738	-	-	C19621	LMFA02000147;HMDB0034295	neg	-	-	-	-	Lipids and lipid-like molecules	Fatty Acyls	377.23	M+Na-2H, M+FA-H	C18H36O5	6.8683	0.0535186	-	59.9	-1.98484	17705-68-9	Fatty acids and conjugates	1.7139	1.7733	1.781	1.4258	1.7609	1.8373	1.811	1.7448	2.0568	1.8563	1.7416	1.7272	1.7803	1.7906	1.8236
neg_1070	16-Ketoestradiol	metab_8775	-	-	C14383	HMDB0000406;LMST02010047	neg	-	-	-	-	Lipids and lipid-like molecules	Steroids and steroid derivatives	285.149	M-H, M+Cl	C18H22O3	6.5072	0.134174	-	67.2	-3.89965	566-75-6	Estrane steroids	1.1053	1.4428	1.2309	1.9428	1.1285	1.4495	1.5589	1.1036	1.4869	1.5424	1.5433	1.989	1.4866	1.5937	1.5162
neg_1120	Gravolenic acid	metab_8825	-	-	-	HMDB0033884	neg	-	-	-	-	Phenylpropanoids and polyketides	Cinnamic acids and derivatives	301.07	M-H, M+Na-2H	C14H16O6	4.5541	0.0335614	-	53.6	8.97129	13781-46-9	Hydroxycinnamic acids and derivatives	1.5433	1.7627	1.4651	1.1065	1.626	1.7854	1.3769	1.964	1.3252	2.116	0.9753	1.2579	1.6534	1.6606	1.6807
neg_1126	Glucosamine-1P	metab_8831	-	-	-	HMDB0001109	neg	-	-	-	-	Organic oxygen compounds	Organooxygen compounds	294.014	M+Cl, M+K-2H	C6H14NO8P	4.365	0.145968	-	62.6	-4.70214	-	Carbohydrates and carbohydrate conjugates	1.6086	1.3671	2.1854	1.6163	1.2755	1.0309	1.4664	1.7646	1.6294	1.2853	2.5183	2.3708	1.938	1.9288	2.038
neg_1141	Uric acid	metab_8846	map01100;map04976;map00230	Metabolic pathways;Bile secretion;Purine metabolism	C00366	HMDB0000289	neg	-	-	Metabolism;Organismal Systems;Metabolism	Global and overview maps;Digestive system;Nucleotide metabolism	Organoheterocyclic compounds	Imidazopyrimidines	167.021	M-H, 2M-H	C5H4N4O3	0.7279	0.0423158	73.6	-	-0.81494	69-93-2	Purines and purine derivatives	2.8005	2.8242	2.8243	2.8506	2.6913	2.7354	3.0082	2.703	3.0805	2.8383	2.9107	2.7032	2.8036	2.8204	2.8402
neg_1146	Arabinonic acid	metab_8851	-	-	C00878	HMDB0000539	neg	-	-	-	-	Organic oxygen compounds	Organooxygen compounds	147.03	M-H2O-H, 2M-H	C5H10O6	0.748	0.0715244	-	63.8	0.522617	13752-83-5	Carbohydrates and carbohydrate conjugates	2.3827	2.3974	2.1473	2.3742	2.4869	2.4289	2.2961	2.2691	2.4699	2.3794	2.4313	2.4403	2.3773	2.4372	2.3962
neg_1149	N-(1-Deoxy-1-fructosyl)leucine	metab_8854	-	-	-	HMDB0037840	neg	-	-	-	-	Organic acids and derivatives	Carboxylic acids and derivatives	292.139	M-H, M+Cl	C12H23NO7	0.748	0.0833687	-	61.4	-4.40605	34393-18-5	Amino acids, peptides, and analogues	1.6783	1.7121	1.477	1.8103	2.4415	1.5095	2.6423	1.7423	2.0057	1.724	2.0948	2.4609	2.1905	2.2124	2.26
neg_1154	3-Dehydroquinate	metab_8859	map01100;map00400;map01230	Metabolic pathways;Phenylalanine, tyrosine and tryptophan biosynthesis;Biosynthesis of amino acids	C00944	HMDB0012710	neg	-	-	Metabolism;Metabolism;Metabolism	Global and overview maps;Amino acid metabolism;Global and overview maps	Organic acids and derivatives	Hydroxy acids and derivatives	189.04	M-H, 2M+FA-H	C7H10O6	0.748	0.057035	-	77.3	-2.40972	-	Alpha hydroxy acids and derivatives	2.366	2.3901	2.5279	2.4703	2.5589	2.3642	2.5063	2.4228	2.4645	2.6012	2.4025	2.4863	2.4792	2.4603	2.43
neg_1222	2,8-Dihydroxyquinoline-beta-D-glucuronide	metab_8927	-	-	-	HMDB0011658	neg	-	-	-	-	Organic oxygen compounds	Organooxygen compounds	336.071	M-H, M+Na-2H	C15H15NO8	2.8006	0.0149364	-	58.5	-4.05128	-	Carbohydrates and carbohydrate conjugates	2.5204	2.4052	2.1638	2.3177	2.6036	2.8144	2.3523	3.2619	2.6303	2.8198	2.2247	2.0027	2.6271	2.6308	2.6397
neg_1229	L-Tryptophan	metab_8934	map01100;map04978;map05143;map00260;map01210;map04974;map00380;map01230;map00970;map04726;map00400;map05230	Metabolic pathways;Mineral absorption;African trypanosomiasis;Glycine, serine and threonine metabolism;2-Oxocarboxylic acid metabolism;Protein digestion and absorption;Tryptophan metabolism;Biosynthesis of amino acids;Aminoacyl-tRNA biosynthesis;Serotonergic synapse;Phenylalanine, tyrosine and tryptophan biosynthesis;Central carbon metabolism in cancer	C00078	HMDB0000929	neg	Peptides	Amino acids	Metabolism;Organismal Systems;Human Diseases;Metabolism;Metabolism;Organismal Systems;Metabolism;Metabolism;Genetic Information Processing;Organismal Systems;Metabolism;Human Diseases	Global and overview maps;Digestive system;Infectious diseases: Parasitic;Amino acid metabolism;Global and overview maps;Digestive system;Amino acid metabolism;Global and overview maps;Translation;Nervous system;Amino acid metabolism;Cancers: Overview	Organoheterocyclic compounds	Indoles and derivatives	203.082	M-H, M+Cl	C11H12N2O2	2.8533	0.0521669	82.5	-	-1.60157	73-22-3	Indolyl carboxylic acids and derivatives	3.2263	3.3152	3.2817	3.145	3.2493	3.2496	3.2128	3.1486	3.4159	3.1114	3.113	3.0208	3.1649	3.2053	3.2042
neg_1246	2',4'-Dihydroxyacetophenone	metab_8951	-	-	C03663	HMDB0029659	neg	-	-	-	-	Organic oxygen compounds	Organooxygen compounds	188.986	M-H, M+K-2H	C8H8O3	2.9189	0.0287102	-	52.5	-3.23529	89-84-9	Carbonyl compounds	2.9783	2.8858	3.0927	2.9034	3.557	2.9018	2.9378	3.1255	2.8069	3.4353	3.4532	3.2502	3.1848	3.1973	3.2098
neg_1344	Citrulline	metab_9049	map01100;map00220;map01230	Metabolic pathways;Arginine biosynthesis;Biosynthesis of amino acids	C00327	HMDB0000904	neg	Peptides	Amino acids	Metabolism;Metabolism;Metabolism	Global and overview maps;Amino acid metabolism;Global and overview maps	Organic acids and derivatives	Carboxylic acids and derivatives	174.088	M-H	C6H13N3O3	0.6427	0.12753	-	74	-0.0366721	372-75-8	Amino acids, peptides, and analogues	1.8217	1.9086	1.8783	1.5217	1.7878	1.6404	2.0501	1.7268	1.8086	1.9332	1.6075	1.424	1.8246	1.7149	1.7764
neg_1350	Prolylhydroxyproline	metab_9055	-	-	-	HMDB0006695	neg	-	-	-	-	Organic acids and derivatives	Carboxylic acids and derivatives	227.103	M-H	C10H16N2O4	0.6522	0.199036	-	57	-2.98529	18684-24-7	Amino acids, peptides, and analogues	1.8036	1.8458	1.5925	1.99	1.6646	1.7102	1.7917	1.5968	1.9608	1.8048	1.9641	1.7859	1.8001	1.6279	1.7526
neg_1351	L-Glutamate	metab_9056	map01200;map00330;map00220;map00250;map04072;map04216;map00630;map00430;map04964;map00471;map02010;map00860;map04080;map05016;map05014;map04727;map04742;map04723;map05031;map04721;map04720;map01100;map00480;map04540;map01210;map00340;map00524;map01230;map04068;map05034;map04724;map05030;map00650;map00910;map04974;map04713;map00970;map05230;map05033;map04730	Carbon metabolism;Arginine and proline metabolism;Arginine biosynthesis;Alanine, aspartate and glutamate metabolism;Phospholipase D signaling pathway;Ferroptosis;Glyoxylate and dicarboxylate metabolism;Taurine and hypotaurine metabolism;Proximal tubule bicarbonate reclamation;D-Glutamine and D-glutamate metabolism;ABC transporters;Porphyrin and chlorophyll metabolism;Neuroactive ligand-receptor i…	C00302;C00025;C00217	-	neg	-;Peptides;Hormones and transmitters;Peptides	-;Amino acids;Neurotransmitters;Amino acids	Metabolism;Metabolism;Metabolism;Metabolism;Environmental Information Processing;Cellular Processes;Metabolism;Metabolism;Organismal Systems;Metabolism;Environmental Information Processing;Metabolism;Environmental Information Processing;Human Diseases;Human Diseases;Organismal Systems;Organismal Systems;Organismal Systems;Human Diseases;Organismal Systems;Organismal Systems;Metabolism;Metabolism;…	Global and overview maps;Amino acid metabolism;Amino acid metabolism;Amino acid metabolism;Signal transduction;Cell growth and death;Carbohydrate metabolism;Metabolism of other amino acids;Excretory system;Metabolism of other amino acids;Membrane transport;Metabolism of cofactors and vitamins;Signaling molecules and interaction;Neurodegenerative diseases;Neurodegenerative diseases;Nervous system;…	-	-	146.046	M-H	C5H9NO4	0.6614	0.124656	73	-	1.08183	-	-	1.599	1.7071	1.6357	1.8099	1.4965	1.8908	1.5375	1.6649	1.601	1.7067	1.6998	1.7013	1.6449	1.5615	1.6645
neg_1354	N-(1-Deoxy-1-fructosyl)valine	metab_9059	-	-	-	HMDB0037844	neg	-	-	-	-	Organic acids and derivatives	Carboxylic acids and derivatives	278.124	M-H	C11H21NO7	0.6614	0.128938	-	55.3	-3.52171	-	Amino acids, peptides, and analogues	1.4678	0.7842	0.8599	1.3159	2.2177	0.931	2.4715	0.7476	1.3315	0.9663	1.8924	2.2736	2.0182	2.0191	1.9185
neg_1355	N5-Acetyl-N2-gamma-L-glutamyl-L-ornithine	metab_9060	-	-	-	HMDB0039423	neg	-	-	-	-	Organic acids and derivatives	Carboxylic acids and derivatives	284.124	M-H2O-H	C12H21N3O6	0.6614	0.129929	-	66.5	-2.98046	102148-92-5	Amino acids, peptides, and analogues	2.1387	2.3639	2.1333	2.1988	2.0895	2.0709	2.1025	2.1225	2.1985	2.326	2.3595	2.0712	2.2478	2.1368	2.1844
neg_1356	Glycerophosphocholine	metab_9061	map00565;map00564;map05231	Ether lipid metabolism;Glycerophospholipid metabolism;Choline metabolism in cancer	C00670	HMDB0000086	neg	-	-	Metabolism;Metabolism;Human Diseases	Lipid metabolism;Lipid metabolism;Cancers: Overview	Lipids and lipid-like molecules	Glycerophospholipids	292.071	M+Cl	C8H20NO6P	0.6614	0.190721	87.5	-	-4.40125	28319-77-9	Glycerophosphocholines	1.5061	1.8534	1.9051	1.481	1.3658	1.6866	1.4711	1.7636	1.8677	1.9826	1.5403	1.2963	1.8104	1.658	1.8065
neg_1358	L-Malic acid	metab_9063	map01100;map00630;map05211;map05200;map04964;map01200;map00620;map04922;map00020;map05230;map04742	Metabolic pathways;Glyoxylate and dicarboxylate metabolism;Renal cell carcinoma;Pathways in cancer;Proximal tubule bicarbonate reclamation;Carbon metabolism;Pyruvate metabolism;Glucagon signaling pathway;Citrate cycle (TCA cycle);Central carbon metabolism in cancer;Taste transduction	C00149	HMDB0000156	neg	Organic acids	Carboxylic acids	Metabolism;Metabolism;Human Diseases;Human Diseases;Organismal Systems;Metabolism;Metabolism;Organismal Systems;Metabolism;Human Diseases;Organismal Systems	Global and overview maps;Carbohydrate metabolism;Cancers: Specific types;Cancers: Overview;Excretory system;Global and overview maps;Carbohydrate metabolism;Endocrine system;Carbohydrate metabolism;Cancers: Overview;Sensory system	Organic acids and derivatives	Hydroxy acids and derivatives	133.014	M-H	C4H6O5	0.6709	0.0195255	60.4	-	1.29522	97-67-6	Beta hydroxy acids and derivatives	2.3291	2.3025	1.9808	2.1235	2.1047	2.3419	2.2995	2.33	2.4745	2.5262	2.4961	2.4855	2.3136	2.3138	2.3282
neg_1359	Fagomine	metab_9064	-	-	C10144	HMDB0033453	neg	-	-	-	-	Organoheterocyclic compounds	Piperidines	146.082	M-H	C6H13NO3	0.6709	0.0899637	-	67.9	0.489292	53185-12-9	Not Available	1.6929	1.6187	1.7092	1.5792	1.5474	1.6217	1.6302	1.6918	1.5877	1.6359	1.6436	1.3258	1.6883	1.6151	1.6758
neg_1369	Uridine	metab_9074	map00240;map01100	Pyrimidine metabolism;Metabolic pathways	C00299	HMDB0000296	neg	Nucleic acids	Nucleosides	Metabolism;Metabolism	Nucleotide metabolism;Global and overview maps	Nucleosides, nucleotides, and analogues	Pyrimidine nucleosides	279.038	M+Cl	C9H12N2O6	0.7374	0.0682021	-	56.3	-3.17597	58-96-8	Not Available	2.5032	2.749	2.5403	2.4518	2.5824	2.524	2.447	2.5079	2.7452	2.6267	2.4744	2.4822	2.5537	2.6106	2.5706
neg_1418	Dehydroascorbic acid	metab_9123	map01100;map00480;map00053	Metabolic pathways;Glutathione metabolism;Ascorbate and aldarate metabolism	C05422;C00425	HMDB0001264	neg	-	-	Metabolism;Metabolism;Metabolism	Global and overview maps;Metabolism of other amino acids;Carbohydrate metabolism	Organoheterocyclic compounds	Lactones	173.008	M-H	C6H6O6	1.1155	0.20806	-	72.3	-4.48707	490-83-5	Gamma butyrolactones	1.5538	1.5673	0.8325	0.8824	1.1701	1.4465	1.4575	1.2864	1.8169	1.6478	1.5486	1.4445	1.4121	1.4624	1.2861
neg_1435	Picrocrocin	metab_9140	-	-	C17055	HMDB0005796	neg	-	-	-	-	Organic oxygen compounds	Organooxygen compounds	365.134	M+Cl	C16H26O7	1.7803	0.120726	-	52.4	-9.58583	138-55-6	Carbohydrates and carbohydrate conjugates	1.7654	1.7539	1.706	1.7997	1.7939	1.7979	1.7411	1.777	1.6921	1.9241	1.851	1.7138	1.7165	1.7409	1.8133
neg_1452	2,8-Quinolinediol	metab_9157	-	-	-	-	neg	-	-	-	-	-	-	160.04	M-H	C9H7NO2	2.6864	0.221575	89.6	-	0.293594	-	-	1.3372	0.9714	1.1873	1.3024	1.1368	1.1919	0.7853	1.5643	1.2666	1.3421	1.1485	1.0412	1.0116	1.1623	1.1878
neg_1464	10-Formyltetrahydrofolate	metab_9169	map01100;map01523;map01200;map00670;map00970	Metabolic pathways;Antifolate resistance;Carbon metabolism;One carbon pool by folate;Aminoacyl-tRNA biosynthesis	C00234	HMDB0000972	neg	-	-	Metabolism;Human Diseases;Metabolism;Metabolism;Genetic Information Processing	Global and overview maps;Drug resistance: Antineoplastic;Global and overview maps;Metabolism of cofactors and vitamins;Translation	Organoheterocyclic compounds	Dithiolanes	472.157	M-H	C20H23N7O7	2.8006	0.0646852	-	58.3	-3.94474	2800-34-2	Lipoamides	1.1265	1.1801	0.7417	0.6275	1.1356	0.684	1.6892	0.6031	1.2937	1.007	1.6594	1.6325	1.302	1.2489	1.2735
neg_1494	Hydroxyphenyllactic acid	metab_9199	map00130;map00350	Ubiquinone and other terpenoid-quinone biosynthesis;Tyrosine metabolism	C03672	HMDB0000755	neg	-	-	Metabolism;Metabolism	Metabolism of cofactors and vitamins;Amino acid metabolism	Phenylpropanoids and polyketides	Phenylpropanoic acids	181.05	M-H	C9H10O4	2.9096	0.0719767	52.2	-	-2.12512	306-23-0	Not Available	1.7581	1.8123	1.5782	1.9882	1.7894	2.1856	1.6622	1.6741	1.9365	1.7364	1.633	1.741	1.7649	1.7448	1.704
neg_1503	(-)-erythro-Anethole glycol 1-glucoside	metab_9208	-	-	-	HMDB0033066	neg	-	-	-	-	Organic oxygen compounds	Organooxygen compounds	381.099	M+K-2H	C16H24O8	2.9377	0.261866	-	91.4	8.75687	217973-33-6	Carbohydrates and carbohydrate conjugates	1.4386	1.1333	1.2105	1.1415	1.7112	1.3399	1.2599	1.3202	1.094	1.4444	0.9584	0.7757	1.2086	1.0947	1.3112
neg_1508	Mevalonic acid	metab_9213	map01100;map04216;map00900	Metabolic pathways;Ferroptosis;Terpenoid backbone biosynthesis	C00418	LMFA01050352;HMDB0000227	neg	-	-	Metabolism;Cellular Processes;Metabolism	Global and overview maps;Cell growth and death;Metabolism of terpenoids and polyketides	Lipids and lipid-like molecules	Fatty Acyls	129.056	M-H2O-H	C6H12O4	2.9472	0.00658799	-	67.4	4.19695	150-97-0	Fatty acids and conjugates	3.0969	3.1564	3.1765	3.2548	2.9713	3.1144	3.3943	3.0393	3.3543	2.658	3.215	3.5625	3.2189	3.2159	3.2217
neg_1516	Tyrosyl-Threonine	metab_9221	-	-	-	HMDB0029115	neg	-	-	-	-	Organic acids and derivatives	Carboxylic acids and derivatives	263.103	M-H2O-H	C13H18N2O5	2.9757	0.0822179	-	77.9	-1.75094	-	Amino acids, peptides, and analogues	1.058	0.845	0.4441	0.482	1.2722	1.4008	1.2504	1.0589	0.8954	1.3409	1.1864	1.5625	1.1908	1.2497	1.2513
neg_1518	{[3-(6,7-dimethoxy-2H-1,3-benzodioxol-5-yl)prop-2-en-1-yl]oxy}sulfonic acid	metab_9223	-	-	-	HMDB0128688	neg	-	-	-	-	Organoheterocyclic compounds	Benzodioxoles	317.033	M-H	C12H14O8S	2.9854	0.182436	-	92	-2.09705	-	Not Available	1.5903	1.3351	0.2449	0.2708	1.4281	0.6255	1.069	0.9706	1.2113	1.2554	0.6311	0.2493	1.0018	0.9959	1.1186
neg_1522	Glycyl-Arginine	metab_9227	-	-	-	HMDB0028835	neg	-	-	-	-	Organic acids and derivatives	Carboxylic acids and derivatives	692.387	3M-H	C8H17N5O3	3.0047	0.176717	-	69.3	-7.59376	-	Amino acids, peptides, and analogues	1.0591	1.1914	0.9186	1.4011	1.5141	1.1348	1.2515	1.7127	2.1461	0.585	1.6031	1.7949	1.2493	1.3875	1.3795
neg_1570	Glucosylsphingosine	metab_9275	-	-	C03108	HMDB0000596	neg	-	-	-	-	Lipids and lipid-like molecules	Sphingolipids	496.301	M+Cl	C24H47NO7	3.2134	0.0270442	-	51.7	-7.5704	52050-17-6	Glycosphingolipids	3.2819	3.5437	3.5037	3.6561	3.4856	3.3842	3.3444	3.3541	3.4273	3.3847	3.5028	3.4776	3.4419	3.4653	3.4528
neg_1579	DIDP	metab_9284	map00230	Purine metabolism	C01344	HMDB0003536	neg	-	-	Metabolism	Nucleotide metabolism	Nucleosides, nucleotides, and analogues	Purine nucleotides	446.992	M+Cl	C10H14N4O10P2	3.2422	0.103172	-	63.7	9.46266	26575-15-5	Purine deoxyribonucleotides	2.3715	2.1921	1.1758	1.0717	2.5034	2.6145	1.5327	2.2542	2.0308	2.4143	1.8	0.6261	2.0476	2.0432	2.1203
neg_1581	PS(15:0/20:4(5Z,8Z,11Z,14Z))	metab_9286	-	-	-	LMGP03010154;HMDB0112331	neg	-	-	-	-	Lipids and lipid-like molecules	Glycerophospholipids	804.453	M+Cl	C41H72NO10P	3.2422	0.0939565	-	93.3	-6.89564	-	Glycerophosphoserines	1.853	2.1097	2.2825	2.4811	2.2734	2.1389	2.1391	2.2908	2.0888	1.8359	2.3997	2.5027	2.2148	2.1526	2.2314
neg_1586	Okadaic acid	metab_9291	-	-	C01945	HMDB0030441	neg	-	-	-	-	Organic oxygen compounds	Organooxygen compounds	803.456	M-H	C44H68O13	3.2616	0.0557577	-	68	-3.61472	78111-17-8	Ethers	0.8732	1.4164	1.4277	1.4627	1.6777	1.0469	1.4187	1.6985	1.5057	0.9958	1.6177	1.6822	1.446	1.4928	1.471
neg_1605	PA(18:3(6Z,9Z,12Z)/22:6(4Z,7Z,10Z,13Z,16Z,19Z))	metab_9310	-	-	-	HMDB0114997;LMGP10010394	neg	-	-	-	-	Lipids and lipid-like molecules	Glycerophospholipids	787.461	M+FA-H	C43H67O8P	3.3565	0.0371766	-	57.3	7.78178	-	Glycerophosphates	2.8441	2.96	3.015	3.0848	3.1508	2.9599	2.9133	3.1371	3.0195	2.8005	3.1174	3.1417	3.0078	3.0078	3.0355
neg_1608	P-Cresol glucuronide	metab_9313	-	-	-	HMDB0011686	neg	-	-	-	-	Organic oxygen compounds	Organooxygen compounds	283.081	M-H	C13H16O7	3.3757	0.0209193	-	63.6	-3.6872	-	Carbohydrates and carbohydrate conjugates	2.4127	2.4913	2.299	2.8676	2.3717	2.7761	2.7659	2.7503	2.6501	2.6573	3.0057	2.9562	2.7356	2.7521	2.7376
neg_1612	Majonoside R2	metab_9317	-	-	-	HMDB0040418	neg	-	-	-	-	Lipids and lipid-like molecules	Prenol lipids	823.431	M+K-2H	C41H70O14	3.3855	0.0758561	-	63.5	7.86882	81534-63-6	Terpene glycosides	2.3966	2.522	2.4736	2.414	2.444	2.2981	2.3825	2.3937	2.4466	2.3104	2.4346	2.509	2.3821	2.3238	2.3296
neg_1621	14-hydroxyclarithromycin	metab_9326	-	-	-	HMDB0061019	neg	-	-	-	-	Organic oxygen compounds	Organooxygen compounds	744.455	M-H2O-H	C38H69NO14	3.4194	0.0375896	-	89.8	1.88144	-	Carbohydrates and carbohydrate conjugates	2.8185	3.0681	3.1105	3.1541	2.8339	2.8323	3.1649	2.8229	3.1058	2.4911	3.0497	3.3661	3.0337	3.0028	3.0098
neg_1634	13-Demethyl tacrolimus	metab_9339	-	-	-	HMDB0060706	neg	-	-	-	-	Organoheterocyclic compounds	Diazines	788.458	M-H	C43H67NO12	3.4664	0.0148051	-	70	-1.72791	-	Pyrimidines and pyrimidine derivatives	3.8416	4.0217	4.0211	4.0693	3.9843	3.9175	3.838	3.8985	3.9552	3.9159	3.9629	3.9744	3.9573	3.9494	3.9446
neg_1637	PG(18:3(6Z,9Z,12Z)/22:6(4Z,7Z,10Z,13Z,16Z,19Z))	metab_9342	-	-	-	LMGP04010396;HMDB0010674	neg	-	-	-	-	Lipids and lipid-like molecules	Glycerophospholipids	815.492	M-H	C46H73O10P	3.4759	0.268893	-	97.5	6.55647	-	Glycerophosphoglycerols	2.1364	2.3421	2.3262	2.4847	2.4793	2.2908	2.2131	2.1323	2.1558	2.2532	2.3153	2.3122	2.059	2.2799	2.2833
neg_1669	P-cresol	metab_9374	map01100;map04974	Metabolic pathways;Protein digestion and absorption	C01468	HMDB0001858	neg	-	-	Metabolism;Organismal Systems	Global and overview maps;Digestive system	Benzenoids	Phenols	107.051	M-H	C7H8O	3.7384	0.0385683	63	-	8.31064	106-44-5	Cresols	2.6102	2.757	3.1741	3.427	2.5205	3.3978	3.3113	3.1735	3.2062	3.1899	3.2219	3.573	3.155	3.1838	3.1551
neg_1670	P-Tolyl Sulfate	metab_9375	-	-	-	-	neg	-	-	-	-	-	-	187.007	M-H	C7H8O4S	3.7384	0.0168769	88.4	-	0.067286	-	-	4.0678	4.1489	4.4686	4.7156	4.004	4.648	4.6041	4.4593	4.563	4.5132	4.5201	4.8346	4.5171	4.5255	4.5318
neg_1674	N1-(5-Phospho-a-D-ribosyl)-5,6-dimethylbenzimidazole	metab_9379	map01100;map00860	Metabolic pathways;Porphyrin and chlorophyll metabolism	C04778	HMDB0003882	neg	-	-	Metabolism;Metabolism	Global and overview maps;Metabolism of cofactors and vitamins	Nucleosides, nucleotides, and analogues	Benzimidazole ribonucleosides and ribonucleotides	393.062	M+Cl	C14H19N2O7P	3.7805	0.0899149	-	50.8	0.0289148	-	Not Available	1.923	2.1844	1.5865	1.2982	2.4584	2.1438	2.3667	1.8337	2.4553	2.4086	1.2787	2.2957	2.1596	2.1758	2.1005
neg_1677	Benzoin	metab_9382	-	-	C01408	HMDB0032039	neg	-	-	-	-	Phenylpropanoids and polyketides	Stilbenes	257.081	M+FA-H	C14H12O2	3.8357	0.184001	-	85.3	-3.28666	119-53-9	Benzoins	0.1047	0.216	0.762	0.1131	0.7378	1.2731	0.1112	1.5374	0.7031	1.9654	0.1084	0.232	1.1488	1.0655	1.2156
neg_1686	N-Acetyl-D-Tryptophan	metab_9391	-	-	C03137	-	neg	-	-	-	-	-	-	245.092	M-H	C13H14N2O3	3.9292	0.0415682	66.3	-	-2.81006	-	-	1.4485	1.3548	1.5595	0.8279	1.3218	1.5786	1.1599	1.5796	1.7168	1.0732	1.242	0.9746	1.3411	1.3756	1.3609
neg_1692	3-(5-Methyl-2-furyl)prop-2-enal	metab_9397	-	-	-	HMDB0032400	neg	-	-	-	-	Organoheterocyclic compounds	Heteroaromatic compounds	181.05	M+FA-H	C8H8O2	4.0047	0.042796	-	63.1	-2.33742	5555-90-8	Not Available	1.4021	1.4333	1.3749	1.3789	1.4092	1.389	1.4706	1.2729	1.4618	1.424	1.3762	1.3929	1.3461	1.3782	1.3498
neg_1694	5'-Phosphoribosyl-N-formylglycinamide	metab_9399	map01100;map00230	Metabolic pathways;Purine metabolism	C04376	HMDB0001308	neg	-	-	Metabolism;Metabolism	Global and overview maps;Nucleotide metabolism	Nucleosides, nucleotides, and analogues	Glycinamide ribonucleotides	335.028	M+Na-2H	C8H15N2O9P	4.0047	0.173264	-	91.7	4.96904	-	Not Available	0.7438	1.0734	1.2375	0.7145	1.048	1.0738	1.0882	1.1023	0.8604	1.0588	0.9548	1.0461	1.0555	1.0574	1.1718
neg_1695	Hexanoylglycine	metab_9400	-	-	-	HMDB0000701	neg	-	-	-	-	Organic acids and derivatives	Carboxylic acids and derivatives	172.098	M-H	C8H15NO3	4.0142	0.188559	-	67.3	-1.36231	24003-67-6	Amino acids, peptides, and analogues	1.5707	1.2757	1.1141	1.7591	1.1377	1.1891	0.9769	1.0821	1.7257	1.1298	1.3715	1.4674	1.2256	1.362	1.3755
neg_1698	Citroside A	metab_9403	-	-	-	HMDB0030370	neg	-	-	-	-	Lipids and lipid-like molecules	Prenol lipids	367.176	M-H2O-H	C19H30O8	4.0235	0.0982324	-	74	-1.15775	120330-44-1	Terpene glycosides	1.3654	1.2253	1.0647	1.08	1.3627	1.4195	1.288	1.2218	1.3084	1.1874	0.7391	1.0067	1.246	1.1834	1.1742
neg_1699	Equol 7-O-glucuronide	metab_9404	-	-	-	HMDB0041732	neg	-	-	-	-	Phenylpropanoids and polyketides	Isoflavonoids	417.117	M-H	C21H22O9	4.0522	0.0737169	-	96.2	-4.06199	-	Isoflavonoid O-glycosides	1.525	1.717	1.585	1.6403	1.7106	1.7942	1.5941	1.5771	1.6309	1.8031	1.5409	1.4999	1.6103	1.6709	1.6578
neg_1706	Armexifolin	metab_9411	-	-	-	HMDB0035596	neg	-	-	-	-	Lipids and lipid-like molecules	Prenol lipids	283.097	M+Na-2H	C15H18O4	4.1263	0.125825	-	75.9	7.405	64929-15-3	Terpene lactones	1.0307	0.9105	0.6883	0.0129	1.4515	1.6169	0.0202	1.7865	0.8876	2.1579	0.0123	1.2375	1.366	1.4691	1.4474
neg_1712	Annuolide G	metab_9417	-	-	-	HMDB0034605	neg	-	-	-	-	Lipids and lipid-like molecules	Prenol lipids	383.127	M+K-2H	C20H26O5	4.2053	0.103447	-	57.5	1.17426	-	Terpene lactones	1.9268	1.5262	1.859	1.3202	2.2616	1.4894	1.2441	1.5752	1.8391	1.7189	1.2217	1.0334	1.6384	1.6587	1.7211
neg_1735	3-Indoleacetic Acid	metab_9440	map01100;map00380	Metabolic pathways;Tryptophan metabolism	C00954	-	neg	-	-	Metabolism;Metabolism	Global and overview maps;Amino acid metabolism	-	-	174.056	M-H	C10H9NO2	4.3461	0.04392	81.4	-	-1.48385	-	-	1.8542	1.6742	1.6111	1.7639	1.9212	1.6591	1.7916	1.6439	1.7734	1.6873	1.581	2.4212	1.8517	1.8726	1.8351
neg_1739	Cysteinyl-Cysteine	metab_9444	-	-	-	HMDB0028772	neg	-	-	-	-	Organic acids and derivatives	Carboxylic acids and derivatives	269.025	M+FA-H	C6H12N2O3S2	4.3933	0.136921	-	75.1	-7.76014	-	Amino acids, peptides, and analogues	1.1372	1.3	1.3617	1.2448	1.2393	1.1986	1.0941	1.18	1.2339	1.1892	1.2182	1.3054	1.1643	1.2494	1.1494
neg_1748	6-Hydroxymelatonin glucuronide	metab_9453	-	-	-	HMDB0060786	neg	-	-	-	-	Organic oxygen compounds	Organooxygen compounds	469.144	M+FA-H	C19H24N2O9	4.4406	0.0418129	-	88.7	-5.23315	-	Carbohydrates and carbohydrate conjugates	0.6415	0.5675	1.0267	1.7274	1.8242	1.0756	2.4327	0.5967	1.9508	0.552	1.4334	2.0098	1.6612	1.6761	1.6965
neg_1750	6-(3-ethenylphenoxy)-3,4,5-trihydroxyoxane-2-carboxylic acid	metab_9455	-	-	-	HMDB0124987	neg	-	-	-	-	Organic oxygen compounds	Organooxygen compounds	277.07	M-H2O-H	C14H16O7	4.4787	0.023159	-	58.1	-4.60583	-	Carbohydrates and carbohydrate conjugates	2.0982	2.1254	2.1089	2.1269	2.1497	2.1198	2.1001	2.1295	2.2272	2.0969	2.0021	1.9634	2.095	2.1098	2.0909
neg_1754	3-Hydroxy-carbofuran	metab_9459	-	-	-	HMDB0032775	neg	-	-	-	-	Organoheterocyclic compounds	Coumarans	218.081	M-H2O-H	C12H15NO4	4.5072	0.0606515	-	77.8	-3.61687	16655-82-6	Not Available	1.4039	1.0854	1.4232	1.2671	0.9401	1.0399	1.3857	0.9568	1.6178	1.4296	1.173	1.958	1.3627	1.408	1.3676
neg_1766	Pyrogallol-2-O-glucuronide	metab_9471	-	-	-	HMDB0060017	neg	-	-	-	-	Organic oxygen compounds	Organooxygen compounds	347.061	M+FA-H	C12H14O9	4.5921	0.0611076	-	52.1	-3.72367	-	Carbohydrates and carbohydrate conjugates	1.7989	1.3119	1.5315	1.6512	1.2275	1.488	1.6712	1.3305	1.0442	1.6254	2.1187	1.3272	1.5444	1.5961	1.5744
neg_1767	3-(2,3-dihydroxyphenyl)prop-2-enal	metab_9472	-	-	-	HMDB0134029	neg	-	-	-	-	Phenylpropanoids and polyketides	Cinnamaldehydes	373.092	2M+FA-H	C9H8O3	4.5921	0.0687399	-	57.4	-4.2394	-	Not Available	1.1966	1.2255	0.955	1.0606	1.4107	1.1377	1.107	1.177	1.4112	0.7175	0.8987	0.9601	1.0874	1.0971	1.1385
neg_1768	Austroinulin	metab_9473	-	-	-	HMDB0036802	neg	-	-	-	-	Lipids and lipid-like molecules	Prenol lipids	359.198	M+K-2H	C20H34O3	4.6111	0.0309528	-	63.4	-3.9883	62868-75-1	Diterpenoids	1.7268	1.7061	1.3105	1.6895	1.5321	1.8133	1.3065	1.544	1.5268	1.1113	1.3848	1.3344	1.521	1.5227	1.4991
neg_1779	(1beta,2beta,5beta)-p-Menth-3-ene-1,2,5-triol	metab_9484	-	-	-	HMDB0038978	neg	-	-	-	-	Lipids and lipid-like molecules	Prenol lipids	185.118	M-H	C10H18O3	4.6966	0.205615	-	84.3	-1.39345	359875-80-2	Monoterpenoids	1.3027	1.1075	0.4805	1.036	1.1574	0.2887	1.3863	0.558	1.3341	0.4472	1.5667	0.3539	1.0027	1.06	1.1613
neg_1784	3-Hydroxyisoheptanoic acid	metab_9489	-	-	-	HMDB0002207	neg	-	-	-	-	Organic acids and derivatives	Hydroxy acids and derivatives	145.087	M-H	C7H14O3	4.744	0.0488126	-	82.9	0.693732	40309-49-7	Medium-chain hydroxy acids and derivatives	2.2847	2.0649	2.3602	2.3117	2.0918	2.0994	2.0526	2.0626	2.0627	2.1351	2.1769	2.304	2.2009	2.1636	2.1664
neg_1785	Dihydronaringenin-O-sulphate	metab_9490	-	-	-	HMDB0059996	neg	-	-	-	-	Phenylpropanoids and polyketides	Linear 1,3-diarylpropanoids	353.032	M-H	C15H14O8S	4.744	0.0419161	-	79.1	-4.23635	-	Chalcones and dihydrochalcones	1.8585	1.8001	0.8955	1.167	2.019	1.8973	0.1977	0.5523	0.8171	1.1959	1.5833	0.7276	1.5249	1.4942	1.5255
neg_1800	{[(2E)-3-phenylprop-2-en-1-yl]oxy}sulfonic acid	metab_9505	-	-	-	HMDB0135284	neg	-	-	-	-	Benzenoids	Benzene and substituted derivatives	213.022	M-H	C9H10O4S	4.8389	0.0327858	-	70.7	-3.60164	-	Styrenes	1.7645	1.6847	1.6024	2.0729	1.6203	1.8009	1.2931	1.3746	1.7995	2.078	1.5753	1.4366	1.725	1.7098	1.6971
neg_1802	Fluorometholone	metab_9507	-	-	-	HMDB0014469	neg	-	-	-	-	Lipids and lipid-like molecules	Steroids and steroid derivatives	397.18	M+Na-2H	C22H29FO4	4.8486	0.0200562	-	78.3	1.43912	426-13-1	Pregnane steroids	1.2596	1.3825	0.9942	1.1248	1.3696	1.3599	1.4273	1.405	1.4573	1.3682	1.0848	1.1035	1.2979	1.3137	1.3019
neg_1810	Menthyl pyrrolidone carboxylate	metab_9515	-	-	C03962	HMDB0032368	neg	-	-	-	-	Lipids and lipid-like molecules	Prenol lipids	317.195	M-H	C16H30O6	4.9056	0.0638309	-	65.3	-5.40942	52528-10-6	Terpene glycosides	1.4789	1.2609	0.2019	1.2372	0.8948	1.1854	1.7882	0.215	1.5536	0.8945	2.0156	1.1701	1.3235	1.3756	1.3432
neg_1817	2-Methylbutyroylcarnitine	metab_9522	-	-	-	HMDB0000378;LMFA07070034	neg	-	-	-	-	Lipids and lipid-like molecules	Fatty Acyls	226.144	M-H2O-H	C12H23NO4	4.9436	0.0598837	-	69.7	-3.35391	31023-25-3	Fatty acid esters	1.9059	1.9168	1.9543	1.8438	1.7337	1.8609	1.768	1.8552	1.8913	1.8499	1.7923	1.8693	1.8626	1.84	1.8113
neg_1825	Cis-Resveratrol 3-O-glucuronide	metab_9530	-	-	-	HMDB0041711	neg	-	-	-	-	Phenylpropanoids and polyketides	Stilbenes	425.089	M+Na-2H	C20H20O9	4.9908	0.0871054	-	82.1	8.8796	-	Stilbene glycosides	0.571	1.4876	1.6091	0.6452	1.6475	1.6337	1.5395	1.7346	0.6951	1.5937	1.2424	1.4726	1.4877	1.5385	1.4688
neg_1833	(S)-Batatic acid	metab_9538	-	-	-	HMDB0035721	neg	-	-	-	-	Lipids and lipid-like molecules	Fatty Acyls	217.047	M+Na-2H	C10H12O4	5.0576	0.0307327	-	52.2	-6.1231	-	Fatty acids and conjugates	1.1153	1.3193	1.2522	1.4829	1.2085	1.2523	1.0564	1.1929	1.2776	1.2214	1.1315	1.3059	1.2197	1.1974	1.2188
neg_1840	Gamma-Glutamyl-S-methylcysteine sulfoxide	metab_9545	-	-	-	HMDB0031863	neg	-	-	-	-	Organic acids and derivatives	Carboxylic acids and derivatives	279.065	M-H	C9H16N2O6S	5.1049	0.202408	-	66.1	-0.651578	-	Amino acids, peptides, and analogues	1.4068	1.3733	1.1214	1.1226	1.5873	1.2654	1.4094	1.1557	1.5082	1.3199	0.811	1.0526	1.3593	1.1935	1.2694
neg_1843	(2E)-1-(4-methoxyphenyl)-3-phenylprop-2-en-1-ol	metab_9548	-	-	-	HMDB0135612	neg	-	-	-	-	Phenylpropanoids and polyketides	Linear 1,3-diarylpropanoids	285.112	M+FA-H	C16H16O2	5.1146	0.0816043	-	84.2	-4.29468	-	Not Available	1.5169	1.7162	1.7582	1.7859	1.2262	1.3294	1.8236	1.8561	1.663	1.9829	1.8077	1.4504	1.7001	1.7439	1.676
neg_1857	2-Polyprenyl-3-methyl-5-hydroxy-6-methoxy-1,4-benzoquinone	metab_9562	map01100;map00130	Metabolic pathways;Ubiquinone and other terpenoid-quinone biosynthesis	C17562	HMDB0060352	neg	-	-	Metabolism;Metabolism	Global and overview maps;Metabolism of cofactors and vitamins	Lipids and lipid-like molecules	Prenol lipids	349.164	M+FA-H	C18H24O4	5.2288	0.0550976	-	50.1	-3.9886	-	Quinone and hydroquinone lipids	1.5101	1.4868	1.1661	1.0897	1.3744	1.2771	1.1756	1.4957	1.3182	1.5681	1.2137	0.7971	1.3566	1.3158	1.3197
neg_1882	Cucurbitacin D	metab_9587	-	-	C08796	HMDB0034695;LMST01010106	neg	-	-	-	-	Lipids and lipid-like molecules	Steroids and steroid derivatives	551.277	M+Cl	C30H44O7	5.4006	0.097847	-	58.3	-2.13237	3877-86-9	Cucurbitacins	1.5283	1.3831	1.1901	1.6083	1.5939	1.1836	1.3086	1.5123	1.5693	1.2694	1.0823	1.1615	1.463	1.3813	1.4214
neg_1884	1-Amino-3-hydroxymethyl-5-methyl-adamantane	metab_9589	-	-	-	HMDB0060703	neg	-	-	-	-	Organic oxygen compounds	Organooxygen compounds	240.16	M+FA-H	C12H21NO	5.4101	0.049299	-	90.5	-3.06139	-	Alcohols and polyols	1.542	1.5448	1.644	1.4708	1.3758	1.5335	1.3798	1.4568	1.4601	1.3952	1.425	1.5538	1.46	1.4664	1.4982
neg_1894	L-Citronellol glucoside	metab_9599	-	-	-	HMDB0029850	neg	-	-	-	-	Lipids and lipid-like molecules	Prenol lipids	299.184	M-H2O-H	C16H30O6	5.4676	0.120299	-	84.5	-6.06159	117895-55-3	Terpene glycosides	1.0895	1.0312	0.3317	0.6387	0.5088	0.2916	1.3009	0.4485	1.1083	0.1195	1.5103	0.1174	1.0166	1.1111	1.0567
neg_1905	(R)-2-Hydroxycaprylic acid	metab_9610	-	-	-	HMDB0002264;LMFA01050313	neg	-	-	-	-	Lipids and lipid-like molecules	Fatty Acyls	159.103	M-H	C8H16O3	5.5156	0.0693734	62.4	-	-0.633372	30117-44-3	Fatty acids and conjugates	1.6831	1.5631	1.6801	1.5311	1.4235	1.3649	1.4702	1.4515	1.4519	1.5079	1.6058	1.5137	1.5817	1.5681	1.6237
neg_1917	3-Methoxybenzenepropanoic acid	metab_9622	-	-	-	HMDB0011751	neg	-	-	-	-	Phenylpropanoids and polyketides	Phenylpropanoic acids	179.071	M-H	C10H12O3	5.6018	0.188594	58.1	-	-3.43858	10516-71-9	Not Available	0.9383	0.9934	1.106	1.0097	1.0824	0.8988	0.6445	1.1768	1.1668	1.0283	1.1274	0.6727	1.0034	1.0035	1.1274
neg_1929	Licoagroside B	metab_9634	-	-	-	HMDB0036523	neg	-	-	-	-	Lipids and lipid-like molecules	Saccharolipids	467.097	M+Cl	C18H24O12	5.6882	0.146648	-	70.9	1.00096	-	Not Available	1.3308	1.3897	1.0804	0.2671	1.7303	1.4111	1.4772	1.4434	1.8648	1.404	0.2578	0.3499	1.4301	1.3119	1.4124
neg_1937	3-carboxy-4-methyl-5-pentyl-2-furanpropanoic acid	metab_9642	-	-	-	HMDB0061643	neg	-	-	-	-	Lipids and lipid-like molecules	Fatty Acyls	267.123	M-H	C14H20O5	5.7461	0.0614678	-	55.6	-4.12945	-	Fatty acids and conjugates	1.7002	2.0342	1.434	2.6462	2.1013	2.0088	1.9605	1.8061	2.4804	2.0632	2.0366	2.7254	2.1076	2.0968	2.1465
neg_1941	N-[(3a,5b,7b)-7-hydroxy-24-oxo-3-(sulfooxy)cholan-24-yl]-Glycine	metab_9646	-	-	-	HMDB0002409	neg	-	-	-	-	Lipids and lipid-like molecules	Steroids and steroid derivatives	574.268	M+FA-H	C26H43NO8S	5.7654	0.0764189	-	73.3	-1.51275	133429-88-6	Bile acids, alcohols and derivatives	1.5137	1.3389	1.262	1.0938	1.6474	1.0263	1.8173	1.0114	1.2618	1.0103	1.7481	0.9896	1.4187	1.3679	1.4286
neg_1978	Riesling acetal	metab_9683	-	-	-	HMDB0037562	neg	-	-	-	-	Organoheterocyclic compounds	Tetrahydrofurans	207.138	M-H2O-H	C13H22O3	5.9769	0.0354599	-	71.5	-2.65804	-	Not Available	1.7976	1.806	1.6146	2.2096	1.3907	0.4627	2.4844	1.1388	2.4427	1.1031	2.7122	1.4536	2.0817	2.0999	2.0696
neg_1980	Esculentoside E	metab_9685	-	-	-	HMDB0034635	neg	-	-	-	-	Lipids and lipid-like molecules	Prenol lipids	695.363	M+FA-H	C35H54O11	5.9769	0.0857697	-	75.5	-3.17178	65649-36-7	Triterpenoids	1.6283	1.3813	1.3184	1.3348	1.4166	1.6368	1.6705	1.3606	1.4403	1.6798	1.3032	0.2502	1.4057	1.4031	1.341
neg_1982	Eremopetasinorol	metab_9687	-	-	-	HMDB0029668	neg	-	-	-	-	Organic oxygen compounds	Organooxygen compounds	253.143	M+FA-H	C13H20O2	5.9962	0.0275902	-	66.5	-6.3822	182127-77-1	Alcohols and polyols	1.9917	2.0988	1.8102	1.9977	1.9465	1.7508	2.3222	1.8787	2.3709	1.9322	2.7009	1.8126	2.133	2.1481	2.1566
neg_1994	Homoanserine	metab_9699	-	-	-	HMDB0005767	neg	-	-	-	-	Organic acids and derivatives	Peptidomimetics	289.106	M+Cl	C11H18N4O3	6.0542	0.0791963	-	51	-4.61222	20314-38-9	Hybrid peptides	1.0649	1.2011	1.2954	1.2309	1.2146	1.2717	0.9231	1.0556	1.1887	1.2428	1.1103	1.2505	1.0481	1.107	1.1005
neg_1997	12-Oxo-20-trihydroxy-leukotriene B4	metab_9702	-	-	-	HMDB0012553;LMFA03020050	neg	-	-	-	-	Lipids and lipid-like molecules	Fatty Acyls	363.181	M-H2O-H	C20H30O7	6.0637	0.0560662	-	52.8	-0.71236	-	Eicosanoids	2.5836	0.9058	0.7485	0.7709	0.7565	0.7428	0.4556	0.8744	0.5182	0.9502	0.3065	0.4491	1.7292	1.7247	1.6851
neg_2004	Geranyl 3-methylbutanoate	metab_9709	-	-	-	HMDB0029350	neg	-	-	-	-	Lipids and lipid-like molecules	Fatty Acyls	283.19	M+FA-H	C15H26O2	6.1019	0.128073	-	98	-6.90552	109-20-6	Fatty alcohol esters	0.8919	0.8404	0.2449	0.4611	0.2879	0.2676	1.4921	0.4731	1.2518	0.3799	1.5387	0.6587	1.0553	1.1091	1.0079
neg_2024	Centellasaponin B	metab_9729	-	-	-	HMDB0040123	neg	-	-	-	-	Lipids and lipid-like molecules	Prenol lipids	413.215	M-2H	C42H68O16	6.183	0.151318	-	75.1	-7.70735	386223-75-2	Terpene glycosides	1.6315	1.5262	1.3654	1.0387	1.4983	1.3716	1.1867	1.5445	1.3831	1.5718	0.665	1.0851	1.4638	1.4568	1.3455
neg_2032	Norbutorphanol	metab_9737	-	-	-	HMDB0041954	neg	-	-	-	-	Benzenoids	Phenol esters	517.308	2M-H	C16H21NO2	6.2207	0.234703	-	66.7	1.68136	3792-68-5	Not Available	1.101	1.0115	0.8263	0.5648	1.5568	1.227	1.3488	0.949	0.6185	0.7164	0.8661	0.8402	1.1157	0.9403	1.1133
neg_2040	Theaspirane	metab_9745	-	-	-	HMDB0036823	neg	-	-	-	-	Organoheterocyclic compounds	Tetrahydrofurans	239.164	M+FA-H	C13H22O	6.2484	0.0219178	-	64	-5.83788	36431-72-8	Not Available	1.465	1.3317	0.7171	1.0399	0.858	0.4677	2.0174	0.4568	1.7445	0.4469	1.9706	1.0613	1.5009	1.4946	1.4827
neg_2041	Blumenol C O-[apiosyl-(1->6)-glucoside]	metab_9746	-	-	-	HMDB0031936	neg	-	-	-	-	Lipids and lipid-like molecules	Fatty Acyls	539.23	M+Cl	C24H40O11	6.2484	0.295518	-	84.1	6.76088	177261-68-6	Fatty acyl glycosides	1.7352	1.5012	1.3698	1.5355	1.6801	0.7542	1.6519	1.0134	1.3042	1.6152	1.7529	0.7209	1.4361	1.39	1.6136
neg_2042	(E)-10-Hydroxy-8-decenoic acid	metab_9747	-	-	-	HMDB0039533	neg	-	-	-	-	Organic acids and derivatives	Hydroxy acids and derivatives	185.118	M-H	C10H18O3	6.2579	0.175793	-	90.6	-2.20719	106541-97-3	Medium-chain hydroxy acids and derivatives	1.8978	1.9801	1.5438	1.7625	1.6541	1.5441	2.0565	1.911	1.9983	1.851	2.1332	1.5694	1.8793	1.8159	1.9648
neg_2043	Artabsinolide A	metab_9748	-	-	-	HMDB0035620	neg	-	-	-	-	Organoheterocyclic compounds	Lactones	261.112	M-H2O-H	C15H20O5	6.2672	0.298747	-	95.9	-4.2379	82078-63-5	Gamma butyrolactones	1.0675	0.6884	0.6087	1.51	0.9966	1.2309	0.6468	1.0757	1.3081	1.2002	1.0173	1.3151	1.0409	1.138	1.2779
neg_2051	Lubiminol	metab_9756	-	-	-	HMDB0029604	neg	-	-	-	-	Lipids and lipid-like molecules	Prenol lipids	299.185	M+FA-H	C15H26O3	6.2959	0.123961	-	76.2	-5.39619	55784-92-4	Sesquiterpenoids	0.8959	0.4256	0.2674	0.5084	0.2999	0.5504	1.6203	0.2835	0.9684	0.2762	1.6133	0.283	1.1079	1.0543	1.0102
neg_2069	Alpha-CEHC	metab_9774	-	-	-	HMDB0001518	neg	-	-	-	-	Organoheterocyclic compounds	Benzopyrans	259.133	M-H2O-H	C16H22O4	6.3629	0.0251355	-	58.5	-3.48046	4072-32-6	1-benzopyrans	2.1182	1.9561	1.8893	2.2103	1.7893	1.9821	1.8177	2.0974	2.4169	2.1825	2.0502	2.1921	2.0761	2.059	2.0562
neg_2084	2-Polyprenyl-3-methyl-6-methoxy-1,4-benzoquinone	metab_9789	map01100;map00130	Metabolic pathways;Ubiquinone and other terpenoid-quinone biosynthesis	C17561	HMDB0060353	neg	-	-	Metabolism;Metabolism	Global and overview maps;Metabolism of cofactors and vitamins	Lipids and lipid-like molecules	Prenol lipids	333.17	M+FA-H	C18H24O3	6.4394	0.0917669	-	53.4	-4.26584	-	Quinone and hydroquinone lipids	1.7542	1.684	1.8116	1.9323	1.7711	1.8932	1.9274	1.7712	1.0176	2.0159	2.0194	1.2015	1.7846	1.8631	1.8226
neg_2086	Elatoside G	metab_9791	-	-	-	HMDB0041347	neg	-	-	-	-	Organoheterocyclic compounds	Pyridines and derivatives	663.372	M-H	C36H56O11	6.4394	0.120189	-	99.1	-4.62783	171828-77-6	Not Available	1.3276	1.1248	0.7831	1.3232	1.6368	1.5344	1.4375	1.3021	1.1978	1.2076	0.9681	0.6963	1.1656	1.2616	1.2023
neg_2089	Mupirocin	metab_9794	-	-	C11758	HMDB0014554	neg	-	-	-	-	Lipids and lipid-like molecules	Fatty Acyls	481.279	M-H2O-H	C26H44O9	6.478	0.0527448	-	56.2	-4.10893	12650-69-0	Fatty acids and conjugates	1.4177	1.0476	1.5154	1.6453	1.058	1.1565	1.5974	1.3008	1.5362	1.2428	1.4241	1.0058	1.3317	1.3658	1.3258
neg_2093	Gravelliferone	metab_9798	-	-	-	HMDB0030729	neg	-	-	-	-	Phenylpropanoids and polyketides	Coumarins and derivatives	343.154	M+FA-H	C19H22O3	6.5265	0.154583	-	95.8	-3.81456	21316-80-3	Hydroxycoumarins	1.0318	1.0135	1.0353	1.2065	1.2368	1.1093	1.0159	1.0937	1.0883	1.0011	1.0212	0.9379	1.1057	1.0123	0.9964
neg_2114	5,6-Dihydroxyprostaglandin F1a	metab_9819	-	-	C06475	HMDB0012109	neg	Lipids	Eicosanoids	-	-	Lipids and lipid-like molecules	Fatty Acyls	433.244	M+FA-H	C20H36O7	6.6365	0.209348	-	64.7	-0.973695	11000-26-3	Eicosanoids	1.1588	1.2169	1.1791	0.8864	1.2028	1.1052	1.6937	1.1755	1.3852	0.8776	1.575	1.1482	1.2248	1.3929	1.2878
neg_2116	Procurcumadiol	metab_9821	-	-	-	HMDB0034721	neg	-	-	-	-	Lipids and lipid-like molecules	Prenol lipids	295.154	M+FA-H	C15H22O3	6.6459	0.0754803	-	94.1	-5.66519	129673-90-1	Sesquiterpenoids	1.3667	1.0613	1.2223	1.6074	1.1421	1.3537	1.1447	1.2575	1.6018	1.3108	1.1371	1.5491	1.2827	1.3266	1.3441
neg_2119	Methyl dodecanoate	metab_9824	-	-	-	HMDB0031018;LMFA07010463	neg	-	-	-	-	Lipids and lipid-like molecules	Fatty Acyls	259.19	M+FA-H	C13H26O2	6.675	0.294884	-	63.1	-4.75495	111-82-0	Fatty acid esters	1.3824	1.1633	0.7502	0.4236	0.6874	0.9584	1.2101	0.7277	1.1972	0.9006	1.1017	1.0214	1.0335	1.2106	1.0048
neg_2145	Methyl dihydrophaseate	metab_9850	-	-	-	HMDB0039376	neg	-	-	-	-	Lipids and lipid-like molecules	Prenol lipids	317.136	M+Na-2H	C16H24O5	6.8103	0.0235024	-	80.5	-2.96639	-	Sesquiterpenoids	1.0352	1.1842	0.9088	1.1922	1.0243	1.2133	1.0183	1.1305	1.3591	1.2191	1.1265	1.186	1.0965	1.0822	1.079
neg_2147	Falcarinone	metab_9852	-	-	C08451;C08445	HMDB0033693	neg	-	-	-	-	Organic oxygen compounds	Organooxygen compounds	287.164	M+FA-H	C17H22O	6.8297	0.137177	-	91.5	-4.34456	4117-11-07	Carbonyl compounds	1.0995	1.0951	0.824	1.6821	0.8277	1.6056	1.0741	0.3085	1.5464	0.9356	1.3616	0.8686	1.263	1.1589	1.1834
neg_2150	(6R,8Z)-6-Hydroxy-3-oxotetradecenoic acid	metab_9855	-	-	-	HMDB0062363	neg	-	-	-	-	-	-	255.159	M-H	C14H24O4	6.849	0.248547	-	81.2	-2.99899	-	-	0.3455	0.2741	0.4193	1.2197	0.287	0.3539	1.5886	0.5797	1.3209	0.3605	1.6276	0.5627	0.9965	1.1421	1.2013
neg_2152	Glabric acid	metab_9857	-	-	C17764	HMDB0034689	neg	-	-	-	-	Lipids and lipid-like molecules	Prenol lipids	485.325	M-H	C30H46O5	6.849	0.0932577	-	84.4	-5.36579	22327-86-2	Triterpenoids	1.547	1.5713	1.638	1.8266	1.7894	1.9023	1.8495	1.8888	1.7613	1.8092	1.4541	0.4461	1.7179	1.6507	1.7244
neg_2174	2-Phenyl-1,3-propanediol monocarbamate	metab_9879	map00982	Drug metabolism - cytochrome P450	C16586	HMDB0060351	neg	-	-	Metabolism	Xenobiotics biodegradation and metabolism	Benzenoids	Benzene and substituted derivatives	194.082	M-H	C10H13NO3	6.9877	0.0838526	-	86.9	-3.84392	-	Not Available	1.5515	1.4802	1.4705	1.5543	1.258	1.3955	1.4497	1.687	1.4724	1.4926	1.3503	1.5211	1.5101	1.467	1.441
neg_2182	(Z)-4-Dodecenal	metab_9887	-	-	-	HMDB0032247;LMFA06000256	neg	-	-	-	-	Lipids and lipid-like molecules	Fatty Acyls	241.18	M+FA-H	C13H24O	7.036	0.24327	-	59.3	-3.22267	21944-98-9	Fatty aldehydes	1.4174	1.5133	1.394	1.5407	1.031	1.0499	1.4733	1.3937	1.4476	0.9865	1.6915	1.4619	1.1861	1.3922	1.315
neg_2183	19-Hydroxyandrost-4-ene-3,17-dione	metab_9888	map01100;map00140	Metabolic pathways;Steroid hormone biosynthesis	C05290	LMST02020067;HMDB0003955	neg	-	-	Metabolism;Metabolism	Global and overview maps;Lipid metabolism	Lipids and lipid-like molecules	Steroids and steroid derivatives	347.185	M+FA-H	C19H26O3	7.036	0.116481	-	55.8	-4.29052	510-64-5	Androstane steroids	1.1321	0.6724	1.0844	1.251	1.1031	1.0578	0.4928	1.1244	1.4226	1.464	0.4844	1.3342	1.1657	1.2151	1.1209
neg_2205	5S,15S-DiHETE	metab_9910	-	-	-	LMFA03060010	neg	-	-	-	-	-	-	335.221	M-H	C20H32O4	7.178	0.0795504	50.5	-	-5.5603	-	-	1.707	1.428	1.4999	1.964	1.4733	2.1504	1.9066	2.0884	1.4718	1.8155	1.7378	1.5158	1.8141	1.8145	1.7539
neg_2235	Linoelaidyl carnitine	metab_9940	-	-	-	HMDB0006461;LMFA07070078	neg	-	-	-	-	Lipids and lipid-like molecules	Fatty Acyls	468.331	M+FA-H	C25H45NO4	7.3588	0.0500302	-	55.8	-5.59255	-	Fatty acid esters	2.0443	1.8962	1.9471	1.2742	2.0266	2.0912	1.7864	1.8249	1.2472	0.7237	0.4623	2.2337	1.8751	1.8414	1.8361
neg_2239	6-Keto-prostaglandin F1a	metab_9944	map00590;map01100	Arachidonic acid metabolism;Metabolic pathways	C05961	HMDB0002886	neg	-	-	Metabolism;Metabolism	Lipid metabolism;Global and overview maps	Lipids and lipid-like molecules	Fatty Acyls	369.226	M-H	C20H34O6	7.3781	0.170871	-	54.8	-5.45456	58962-34-8	Eicosanoids	1.5683	1.431	1.2996	1.1565	1.7247	1.4987	1.3971	1.441	1.7024	1.4976	1.1467	1.2641	1.3599	1.4713	1.3464
neg_2240	Norbixin	metab_9945	-	-	C08608	HMDB0035832;LMPR01070209	neg	-	-	-	-	Lipids and lipid-like molecules	Prenol lipids	415.17	M+Cl	C24H28O4	7.3781	0.126077	-	58.1	3.69414	-	Diterpenoids	1.0982	1.2581	1.3366	1.3094	1.0319	1.47	1.3402	1.5196	1.487	1.49	1.2593	1.2995	1.2628	1.3677	1.329
neg_2246	Erinacine P	metab_9951	-	-	-	HMDB0036313	neg	-	-	-	-	Lipids and lipid-like molecules	Prenol lipids	513.242	M+Na-2H	C27H40O8	7.407	0.0388842	-	53.4	-9.3577	291532-17-7	Diterpenoids	1.3727	1.3491	1.407	1.78	1.4774	1.3381	1.1939	1.3721	1.5148	0.9095	0.7616	0.8448	1.3096	1.3408	1.3329
neg_2249	LysoPC(18:4(6Z,9Z,12Z,15Z))	metab_9954	-	-	-	HMDB0010389	neg	-	-	-	-	Lipids and lipid-like molecules	Glycerophospholipids	560.297	M+FA-H	C26H46NO7P	7.4166	0.0701124	-	80.3	-4.4448	-	Glycerophosphocholines	1.4788	1.5549	1.5196	1.311	1.5184	1.5642	1.2932	1.7554	1.3221	1.7332	1.4407	1.3919	1.4569	1.5087	1.4607
neg_2250	8-Acetoxy-4-acoren-3-one	metab_9955	-	-	-	HMDB0030974	neg	-	-	-	-	Organic oxygen compounds	Organooxygen compounds	299.164	M+Na-2H	C17H26O3	7.4218	0.151207	-	56.4	2.74421	185154-95-4	Carbonyl compounds	1.346	1.3385	0.9002	1.5976	0.7761	1.5575	1.2623	1.4196	1.3592	1.3224	0.9459	0.4948	1.1904	1.2978	1.1989
neg_2260	16-Oxoandrostenediol	metab_9965	-	-	-	LMST02020088;HMDB0000322	neg	-	-	-	-	Lipids and lipid-like molecules	Steroids and steroid derivatives	303.195	M-H	C19H28O3	7.5181	0.0219073	-	79.7	-4.83036	1159-66-6	Androstane steroids	1.3621	1.4912	1.2747	1.3026	1.3895	0.8698	1.118	1.0385	1.3209	1.5533	1.2877	0.8648	1.2442	1.2575	1.2405
neg_2265	Corchorifatty acid F	metab_9970	-	-	-	HMDB0035919	neg	-	-	-	-	Lipids and lipid-like molecules	Fatty Acyls	327.216	M-H	C18H32O5	7.528	0.0424457	-	66.2	-3.82648	95341-44-9	Lineolic acids and derivatives	0.7894	1.065	0.2701	0.1916	0.4701	0.1891	1.416	0.2761	1.5788	0.1781	1.9017	0.3412	1.1451	1.13	1.1641
neg_2266	Ceanothic acid	metab_9971	-	-	-	HMDB0036851	neg	-	-	-	-	Lipids and lipid-like molecules	Prenol lipids	531.33	M+FA-H	C30H46O5	7.528	0.148609	-	90.2	-5.61857	21302-79-4	Sesquiterpenoids	0.8824	1.039	1.1618	1.2172	1.1733	1.4206	1.1939	1.6823	1.2459	1.2238	0.6543	0.7203	1.2458	1.2138	1.1252
neg_2285	18-Hydroxycortisol	metab_9990	-	-	-	LMST02030193;HMDB0000418	neg	-	-	-	-	Lipids and lipid-like molecules	Steroids and steroid derivatives	399.176	M+Na-2H	C21H30O6	7.6051	0.112582	-	60.2	-8.73956	86002-90-6	Hydroxysteroids	1.7075	1.777	1.2609	1.5752	1.1842	0.7468	1.4795	1.1365	1.9663	0.8119	1.4836	1.4403	1.8408	1.8589	1.93
neg_2287	5-Ethoxysorgoleone 358	metab_9992	-	-	-	HMDB0032784	neg	-	-	-	-	Organic oxygen compounds	Organooxygen compounds	417.226	M+FA-H	C23H32O4	7.6238	0.148439	-	96.5	-5.443	210708-13-7	Carbonyl compounds	1.5479	1.5466	0.9688	1.3064	1.0992	1.009	1.0079	1.3153	1.6386	1.2911	0.9967	1.6591	1.2149	1.1514	1.2731
neg_2296	Ercalcitriol	metab_10001	-	-	-	HMDB0006225	neg	-	-	-	-	Lipids and lipid-like molecules	Steroids and steroid derivatives	473.323	M+FA-H	C28H44O3	7.6615	0.168536	-	50.9	-9.93571	60133-18-8	Vitamin D and derivatives	1.7409	1.6081	1.7191	1.7673	1.8968	1.7808	1.4508	1.853	1.7965	1.8152	0.919	1.3801	1.524	1.6459	1.531
neg_2302	LysoPE(0:0/18:1(11Z))	metab_10007	-	-	-	HMDB0011475;LMGP02050039	neg	-	-	-	-	Lipids and lipid-like molecules	Glycerophospholipids	524.298	M+FA-H	C23H46NO7P	7.6901	0.084719	-	55.8	-3.64889	-	Glycerophosphoethanolamines	2.3051	2.2542	2.3496	2.2437	2.4194	2.3612	1.7514	2.3279	2.2127	2.3494	2.1853	2.1196	2.1849	2.2021	2.1307
neg_2311	3b-Hydroxy-5-cholenoic acid	metab_10016	-	-	-	HMDB0000308	neg	-	-	-	-	Lipids and lipid-like molecules	Steroids and steroid derivatives	419.278	M+FA-H	C24H38O3	7.7284	0.140225	-	78.9	-6.92045	5255-17-4	Bile acids, alcohols and derivatives	1.6098	1.549	1.4885	1.5866	1.7021	1.5291	1.4924	1.4432	1.747	1.5507	1.1878	1.6946	1.6048	1.5889	1.6957
neg_2323	11-Oxooctadecanoic acid	metab_10028	-	-	-	HMDB0030981	neg	-	-	-	-	Lipids and lipid-like molecules	Fatty Acyls	343.248	M+FA-H	C18H34O3	7.7573	0.0723201	-	82.3	-2.42927	2388-83-2	Fatty acids and conjugates	1.7983	1.8426	1.4892	1.9821	1.8294	1.7624	1.9958	1.7353	2.0301	1.4207	2.0223	1.5301	1.8211	1.8726	1.819
neg_2328	Esculentic acid (Phytolacca)	metab_10033	-	-	-	HMDB0034639	neg	-	-	-	-	Lipids and lipid-like molecules	Prenol lipids	523.305	M+Na-2H	C30H46O6	7.7859	0.26109	-	51.1	1.53036	56283-68-2	Triterpenoids	1.984	2.0342	2.1719	1.9756	1.9415	2.1266	2.0342	2.1863	1.8907	1.716	1.7423	0.8963	1.8445	2.0597	1.9195
neg_2341	Brassinolide	metab_10046	map01100	Metabolic pathways	C11049;C08814	HMDB0034081;LMST01140001	neg	-;Steroids	-;28-Carbon atoms	Metabolism	Global and overview maps	Lipids and lipid-like molecules	Steroids and steroid derivatives	501.319	M+Na-2H	C28H48O6	7.8238	0.18897	-	56.9	-1.99949	72962-43-7	Steroid lactones	2.1922	2.2608	2.3238	2.2529	2.3595	2.5593	2.5599	2.6174	2.3225	2.3866	2.0791	1.5119	2.475	2.4344	2.3102
neg_2343	Dodecanoylcarnitine	metab_10048	-	-	-	LMFA07070062;HMDB0002250	neg	-	-	-	-	Lipids and lipid-like molecules	Fatty Acyls	378.239	M+Cl	C19H37NO4	7.8335	0.26153	-	98.5	-8.51312	25518-54-1	Fatty acid esters	1.4559	1.4859	1.0925	1.3848	1.6229	1.8377	1.7363	1.8514	1.8921	1.7147	1.7344	1.7175	1.6464	1.4582	1.474
neg_2358	3-Oxohexadecanoic acid	metab_10063	-	-	-	HMDB0010733	neg	-	-	-	-	Lipids and lipid-like molecules	Fatty Acyls	269.211	M-H	C16H30O3	7.9181	0.187181	-	94.4	-5.95306	-	Fatty acids and conjugates	1.2004	1.4419	1.2771	1.4986	0.8357	1.3621	1.188	1.3639	1.9736	1.6486	1.2751	1.4957	1.32	1.2589	1.4111
neg_2363	6-Epi-7-isocucurbic acid glucoside	metab_10068	-	-	-	HMDB0029782	neg	-	-	-	-	Lipids and lipid-like molecules	Fatty Acyls	411.145	M+K-2H	C18H30O8	7.9563	0.074343	-	52.3	7.15558	176486-13-8	Fatty acyl glycosides	2.0297	1.9862	1.2977	1.716	1.6337	0.907	3.1038	0.569	2.2662	0.5578	3.1993	1.3139	2.4588	2.5229	2.4879
neg_2389	16,16-dimethyl-PGA2	metab_10094	-	-	-	LMFA03010086	neg	-	-	-	-	-	-	361.237	M-H	C22H34O4	8.1003	0.142779	60.6	-	-4.89831	-	-	1.4782	1.4883	0.7426	1.4898	0.9606	0.7848	2.7146	0.771	1.6399	1.0705	2.7704	0.751	1.9768	1.9381	2.0562
neg_2393	LysoPC(20:4(8Z,11Z,14Z,17Z))	metab_10098	map00564;map05231	Glycerophospholipid metabolism;Choline metabolism in cancer	C04230	LMGP01050140;HMDB0010396	neg	Lipids	Phospholipids	Metabolism;Human Diseases	Lipid metabolism;Cancers: Overview	Lipids and lipid-like molecules	Glycerophospholipids	588.328	M+FA-H	C28H50NO7P	8.1188	0.0832154	-	76.6	-4.44688	-	Glycerophosphocholines	4.3624	4.4739	4.4901	4.3886	4.5001	4.4577	4.1996	4.4277	4.3926	4.4482	4.287	4.565	4.4343	4.4987	4.4412
neg_2417	LPE(18:2)	metab_10122	-	-	-	-	neg	-	-	-	-	-	-	476.276	M-H	C23H44NO7P	8.2614	0.0055663	59.6	-	-4.90127	-	-	4.5293	4.578	4.5866	4.5153	4.5798	4.6426	4.5453	4.5882	4.4519	4.6473	4.4963	4.6091	4.5595	4.5633	4.564
neg_2418	Acrimarine J	metab_10123	-	-	-	HMDB0040386	neg	-	-	-	-	Organoheterocyclic compounds	Quinolines and derivatives	576.201	M-H2O-H	C35H33NO8	8.2614	0.0646812	-	59.9	-2.9978	147395-90-2	Benzoquinolines	3.3814	3.3529	3.4154	3.2914	3.3704	3.4785	3.4053	3.4053	3.25	3.5215	3.2551	3.4659	3.3787	3.3339	3.3871
neg_2419	Linoleic acid	metab_10124	map01100;map00591;map01040	Metabolic pathways;Linoleic acid metabolism;Biosynthesis of unsaturated fatty acids	C01595	HMDB0000673;LMFA01030120	neg	Lipids	Fatty acids	Metabolism;Metabolism;Metabolism	Global and overview maps;Lipid metabolism;Lipid metabolism	Lipids and lipid-like molecules	Fatty Acyls	325.237	M+FA-H	C18H32O2	8.2706	0.102553	-	51.3	-6.7835	60-33-3	Lineolic acids and derivatives	1.9506	1.842	1.2961	2.2453	1.5963	1.5174	2.9156	1.2115	2.4093	1.3435	2.9331	1.6385	2.332	2.2565	2.2579
neg_2431	LysoPE(0:0/20:1(11Z))	metab_10136	-	-	-	LMGP02050046;HMDB0011482	neg	-	-	-	-	Lipids and lipid-like molecules	Glycerophospholipids	552.328	M+FA-H	C25H50NO7P	8.3072	0.0350038	-	77.4	-4.93999	-	Glycerophosphoethanolamines	3.4304	3.5087	3.427	3.1887	3.5081	3.6671	3.2608	3.5896	3.3344	3.5879	3.4537	3.3198	3.4522	3.455	3.4271
neg_2451	LysoPC(20:3(5Z,8Z,11Z))	metab_10156	map00564;map05231	Glycerophospholipid metabolism;Choline metabolism in cancer	C04230	HMDB0010393;LMGP01050139	neg	Lipids	Phospholipids	Metabolism;Human Diseases	Lipid metabolism;Cancers: Overview	Lipids and lipid-like molecules	Glycerophospholipids	590.344	M+FA-H	C28H52NO7P	8.3861	0.0402916	-	75.9	-3.83812	1199257-41-4	Glycerophosphocholines	4.1177	4.1237	4.0903	3.6256	4.0746	4.1603	3.7425	4.1828	3.9176	4.2354	3.9066	3.9436	4.0603	4.0381	4.026
neg_2471	LysoPE(0:0/18:3(9Z,12Z,15Z))	metab_10176	-	-	-	HMDB0011479;LMGP02050043	neg	-	-	-	-	Lipids and lipid-like molecules	Glycerophospholipids	520.266	M+FA-H	C23H42NO7P	8.4511	0.0765203	-	50.8	-5.07258	-	Glycerophosphoethanolamines	1.7911	1.9884	2.0723	2.1444	2.0092	2.3385	2.2792	2.1958	1.8741	2.0357	2.136	2.0205	2.1013	2.0809	2.036
neg_2476	PC(16:0/18:3(6Z,9Z,12Z))	metab_10181	-	-	-	HMDB0007974;LMGP01010598	neg	-	-	-	-	Lipids and lipid-like molecules	Glycerophospholipids	792.488	M+K-2H	C42H78NO8P	8.4699	0.264358	-	73.7	-9.82679	-	Glycerophosphocholines	2.8878	2.5116	3.0899	3.0388	2.7661	2.7637	2.5632	3.082	2.4502	2.8605	2.3544	2.6844	2.9018	2.8917	3.0841
neg_2482	LysoPE(18:1(11Z)/0:0)	metab_10187	-	-	-	HMDB0011505;LMGP02050064	neg	-	-	-	-	Lipids and lipid-like molecules	Glycerophospholipids	460.28	M-H2O-H	C23H46NO7P	8.5257	0.119399	-	52.5	-6.07494	-	Glycerophosphoethanolamines	2.9115	3.1339	3.0998	3.4318	3.037	3.6114	3.366	3.4413	3.4033	3.2169	3.094	3.0221	3.2231	3.2831	3.3275
neg_2511	Tetracosapentaenoic acid (24:5n-3)	metab_10216	-	-	-	HMDB0006323	neg	-	-	-	-	Lipids and lipid-like molecules	Fatty Acyls	403.284	M+FA-H	C24H38O2	8.7105	0.05844	-	60.4	-4.20069	-	Fatty acids and conjugates	1.6885	0.936	0.8564	1.2947	1.5382	1.3116	1.4833	0.8861	1.2811	1.1765	1.6047	1.284	1.3029	1.3146	1.2677
neg_2518	1-Stearoylglycerophosphoserine	metab_10223	-	-	-	HMDB0061698	neg	-	-	-	-	Lipids and lipid-like molecules	Glycerophospholipids	546.28	M+Na-2H	C24H48NO9P	8.7199	0.0931027	-	57.2	-3.48014	-	Glycerophosphoserines	2.6547	2.7462	2.762	2.683	2.6596	2.753	2.6817	2.6733	2.636	2.7073	2.6355	2.736	2.724	2.7354	2.6586
neg_2525	LysoPC(20:2(11Z,14Z))	metab_10230	map00564;map05231	Glycerophospholipid metabolism;Choline metabolism in cancer	C04230	HMDB0010392	neg	Lipids	Phospholipids	Metabolism;Human Diseases	Lipid metabolism;Cancers: Overview	Lipids and lipid-like molecules	Glycerophospholipids	582.331	M+Cl	C28H54NO7P	8.757	0.0915775	-	78.2	-3.98484	-	Glycerophosphocholines	2.1771	1.9178	2.0022	1.2991	1.8307	2.0411	1.7873	1.9581	2.0485	2.168	1.9437	1.8634	1.9586	2.0234	1.9553
neg_2547	PE(P-16:0e/0:0)	metab_10252	-	-	-	HMDB0011152	neg	-	-	-	-	Lipids and lipid-like molecules	Glycerophospholipids	436.281	M-H	C21H44NO6P	8.8696	0.00603781	-	53.7	-5.16057	-	Glycerophosphoethanolamines	3.7267	3.94	3.8654	4.0222	3.8925	4.1711	3.935	3.9713	3.9445	3.9155	3.813	3.7706	3.9138	3.9132	3.909
neg_2560	Ginsenoside M7cd	metab_10265	-	-	-	HMDB0039646	neg	-	-	-	-	Lipids and lipid-like molecules	Prenol lipids	675.407	M+Na-2H	C36H62O10	8.9261	0.085213	-	67.9	-2.39117	69987-14-0	Triterpenoids	1.843	1.5537	1.7536	2.0455	1.8661	1.8775	0.9987	1.9211	2.0148	1.8849	1.1952	1.2598	1.7638	1.7409	1.8114
neg_2595	LysoPC(20:1(11Z))	metab_10300	map00564;map05231	Glycerophospholipid metabolism;Choline metabolism in cancer	C04230	HMDB0010391	neg	Lipids	Phospholipids	Metabolism;Human Diseases	Lipid metabolism;Cancers: Overview	Lipids and lipid-like molecules	Glycerophospholipids	594.375	M+FA-H	C28H56NO7P	9.0489	0.074124	-	78.6	-4.21267	-	Glycerophosphocholines	2.303	2.3342	2.3158	1.9417	2.2965	2.3371	2.2699	2.3993	2.2645	2.3838	2.1971	2.1119	2.2538	2.1971	2.2021
neg_2633	3beta,7alpha-Dihydroxy-5-cholestenoate	metab_10338	map00120	Primary bile acid biosynthesis	C17335	HMDB0012454	neg	-	-	Metabolism	Lipid metabolism	Lipids and lipid-like molecules	Steroids and steroid derivatives	431.316	M-H	C27H44O4	9.1879	0.285524	-	72.1	-2.40053	115538-84-6	Bile acids, alcohols and derivatives	1.6227	1.1245	0.6813	1.3476	1.5946	0.7221	1.3759	1.0108	1.4478	0.6965	1.3953	0.7882	1.2939	1.0565	1.189
neg_2636	N-Undecylbenzenesulfonic acid	metab_10341	-	-	-	HMDB0032549	neg	-	-	-	-	Benzenoids	Benzene and substituted derivatives	311.167	M-H	C17H28O3S	9.2159	0.0515573	-	59.6	-4.80368	50854-94-9	Benzenesulfonic acids and derivatives	4.6118	4.2448	4.2939	4.4194	4.2184	4.3565	4.3002	4.3735	4.2859	4.5713	4.3761	4.3008	4.4012	4.4432	4.41
neg_2637	N-[(3a,5b,7a,12a)-3,12-dihydroxy-24-oxo-7-(sulfooxy)cholan-24-yl]-Glycine	metab_10342	-	-	-	HMDB0002640	neg	-	-	-	-	Lipids and lipid-like molecules	Steroids and steroid derivatives	580.232	M+Cl	C26H43NO9S	9.2159	0.0496294	-	54.8	-5.80706	71977-73-6	Bile acids, alcohols and derivatives	3.4937	3.6299	3.6918	3.6393	3.5672	3.7348	3.602	3.5171	3.4397	3.7435	3.5981	3.7029	3.6237	3.6065	3.6491
neg_2662	LysoPC(P-18:0)	metab_10367	map00564;map05231	Glycerophospholipid metabolism;Choline metabolism in cancer	C04230	HMDB0013122	neg	Lipids	Phospholipids	Metabolism;Human Diseases	Lipid metabolism;Cancers: Overview	Lipids and lipid-like molecules	Glycerophospholipids	552.365	M+FA-H	C26H54NO6P	9.3277	0.0453553	-	89.7	-3.70534	-	Glycerophosphocholines	2.6952	2.8342	2.7523	2.8552	2.8932	2.8775	2.5806	2.7889	2.7711	2.8459	2.6456	2.6225	2.7593	2.7557	2.7232
neg_2692	LysoPC(O-18:0)	metab_10397	map00565;map01100	Ether lipid metabolism;Metabolic pathways	C04317	HMDB0011149	neg	-	-	Metabolism;Metabolism	Lipid metabolism;Global and overview maps	Lipids and lipid-like molecules	Glycerophospholipids	544.352	M+Cl	C26H56NO6P	9.3937	0.226965	-	84	-4.09798	-	Glycerophosphocholines	1.3802	1.7608	1.6592	1.6432	1.816	1.7562	1.4058	1.9412	1.666	1.6186	1.1457	1.4646	1.5824	1.7231	1.5497
neg_2713	5a-Cholestane-3a,7a,12a,25-tetrol	metab_10418	-	-	-	HMDB0000520	neg	-	-	-	-	Lipids and lipid-like molecules	Glycerophospholipids	435.345	M-H	C27H48O4	9.489	0.169596	-	67.9	-5.88643	60257-29-6	Glycerophosphoethanolamines	0.7648	0.9474	1.4602	0.6311	1.0106	0.6674	0.9753	0.8441	0.9558	0.7351	1.9352	1.5093	1.4299	1.362	1.2881
neg_2714	(20S,24E)-20,26-Dihydroxy-24-dammaren-3-one	metab_10419	-	-	-	HMDB0033256	neg	-	-	-	-	Lipids and lipid-like molecules	Prenol lipids	493.35	M+Cl	C30H50O3	9.4985	0.111634	-	60.5	9.7426	99891-80-2	Triterpenoids	1.7152	1.4802	1.3854	1.6049	1.8028	1.7686	1.5895	1.6651	1.5287	1.4244	1.4845	1.3825	1.4937	1.5217	1.5841
neg_2715	(9Z,11E,13E,15Z)-4-Oxo-9,11,13,15-octadecatetraenoic acid	metab_10420	-	-	-	HMDB0031098	neg	-	-	-	-	Lipids and lipid-like molecules	Fatty Acyls	335.188	M+FA-H	C18H26O3	9.508	0.181603	-	94	7.13373	17699-21-7	Lineolic acids and derivatives	1.6981	1.0682	1.2363	1.1756	1.4273	1.0736	1.7069	0.9101	1.2247	1.1374	1.9998	1.353	1.3481	1.4835	1.3689
neg_2719	8,11,14-Eicosatrienoic acid	metab_10424	map01100;map00591;map01040	Metabolic pathways;Linoleic acid metabolism;Biosynthesis of unsaturated fatty acids	C03242	HMDB0002925	neg	-	-	Metabolism;Metabolism;Metabolism	Global and overview maps;Lipid metabolism;Lipid metabolism	Lipids and lipid-like molecules	Fatty Acyls	351.252	M+FA-H	C20H34O2	9.5225	0.0470592	-	61.9	-5.43713	1783-84-2	Fatty acids and conjugates	2.8907	2.3304	2.3025	2.3355	2.4068	2.2128	2.4776	2.2714	2.4271	2.3122	2.594	2.6996	2.5108	2.5353	2.4951
neg_2746	DL-2-hydroxy stearic acid	metab_10451	-	-	-	LMFA02000120	neg	-	-	-	-	-	-	299.258	M-H	C18H36O3	9.6373	0.0787021	64.9	-	-4.5603	-	-	2.8325	2.9658	2.818	2.8522	2.9299	2.7347	3.0455	2.6859	3.1013	2.9324	3.1663	2.8167	2.8976	2.9006	2.957
neg_2747	28-Homobrassinolide	metab_10452	-	-	-	HMDB0030423	neg	-	-	-	-	Lipids and lipid-like molecules	Steroids and steroid derivatives	475.341	M-H2O-H	C29H50O6	9.6373	0.167647	-	78.8	-3.76874	80483-89-2	Steroid lactones	1.8935	1.9161	1.8921	1.9113	2.2267	2.0773	2.0289	1.9704	2.2404	1.9761	1.9643	1.3941	1.8853	2.0306	1.9878
neg_2753	PS(16:1(9Z)/20:0)	metab_10458	-	-	-	LMGP03010216;HMDB0112287	neg	-	-	-	-	Lipids and lipid-like molecules	Glycerophospholipids	834.551	M+FA-H	C42H80NO10P	9.6468	0.0971817	-	70	0.539602	-	Glycerophosphoserines	1.636	2.1765	2.8622	1.6938	2.155	2.1406	1.9775	1.9519	1.9906	2.225	1.7845	2.028	2.2508	2.1693	2.1971
neg_2760	3alpha,7alpha-Dihydroxycoprostanic acid	metab_10465	-	-	-	HMDB0000359	neg	-	-	-	-	Lipids and lipid-like molecules	Steroids and steroid derivatives	433.33	M-H	C27H46O4	9.666	0.137529	-	59.8	-5.62269	17974-66-2	Bile acids, alcohols and derivatives	0.9895	1.0884	1.5798	1.0817	1.7694	1.524	1.7304	1.3839	1.5045	1.8213	1.6526	1.2362	1.4666	1.4434	1.5503
neg_2776	Fasciculic acid A	metab_10481	-	-	-	HMDB0036439	neg	-	-	-	-	Lipids and lipid-like molecules	Prenol lipids	665.428	M+FA-H	C36H60O8	9.7088	0.073399	-	56.6	0.947967	126906-00-1	Triterpenoids	1.858	2.1487	1.9478	2.1495	2.0955	1.8729	1.9753	1.8827	2.1223	1.6742	2.0472	2.2167	1.9182	1.9785	1.9677
neg_2778	Stearoyllactic acid	metab_10483	-	-	-	HMDB0033372;LMFA07011021	neg	-	-	-	-	Lipids and lipid-like molecules	Fatty Acyls	377.271	M+Na-2H	C21H40O4	9.7182	0.0722093	-	58.4	9.1257	4253-64-9	Fatty acid esters	3.1026	3.2755	3.2583	3.2387	3.1445	3.1066	3.2492	3.2087	3.3429	3.2164	3.2381	3.3456	3.218	3.2454	3.2803
neg_2804	Alpha-L-Rhamnopyranosyl-(1->3)-alpha-D-galactopyranosyl-(1->3)-L-fucose	metab_10509	-	-	-	HMDB0039741	neg	-	-	-	-	Organic oxygen compounds	Organooxygen compounds	507.147	M+Cl	C18H32O14	9.8598	0.0968816	-	54.1	-3.92682	71144-75-7	Carbohydrates and carbohydrate conjugates	2.285	2.2327	2.3887	2.3333	2.1175	2.214	2.1555	2.402	2.0925	2.4513	2.1251	2.1986	2.411	2.3282	2.3885
neg_2808	PS(20:0/16:1(9Z))	metab_10513	-	-	-	HMDB0112515;LMGP03010514	neg	-	-	-	-	Lipids and lipid-like molecules	Glycerophospholipids	834.551	M+FA-H	C42H80NO10P	9.9024	0.183319	-	62	1.46436	-	Glycerophosphoserines	1.7182	2.3265	2.5098	2.0474	2.0315	2.1462	1.9778	2.2979	1.1796	2.5069	2.2757	1.9343	2.0111	1.8512	1.9472
neg_2828	Diphenhydramine N-glucuronide	metab_10533	-	-	-	HMDB0060897	neg	-	-	-	-	Organic acids and derivatives	Carboxylic acids and derivatives	431.193	M-H	C23H30NO7+	10.1378	0.00840571	-	63.1	-4.77435	-	Amino acids, peptides, and analogues	1.8283	2.0179	1.9542	2.0004	2.0124	1.9484	1.9035	1.9836	1.9523	1.6847	2.0238	1.959	1.9354	1.9404	1.9334
neg_2830	LysoPC(22:0)	metab_10535	map00564;map05231	Glycerophospholipid metabolism;Choline metabolism in cancer	C04230	HMDB0010398	neg	Lipids	Phospholipids	Metabolism;Human Diseases	Lipid metabolism;Cancers: Overview	Lipids and lipid-like molecules	Glycerophospholipids	624.423	M+FA-H	C30H62NO7P	10.1378	0.0870409	-	87.3	-2.54963	-	Glycerophosphocholines	1.9163	1.9535	1.7508	1.8014	2.1775	2.1105	1.97	2.077	1.9092	1.8544	1.8607	1.7493	2.005	1.9302	1.967
neg_2842	Mangalkanyl glucoside	metab_10547	-	-	-	HMDB0036015	neg	-	-	-	-	Organic oxygen compounds	Organooxygen compounds	407.245	M+Na-2H	C21H38O6	10.2286	0.222861	-	50.1	9.13139	259144-63-3	Carbohydrates and carbohydrate conjugates	1.5394	1.4748	1.542	1.2414	1.3197	1.4532	1.2841	1.1177	1.3712	1.0136	1.4864	1.4596	1.4389	1.3937	1.2508
neg_2850	PE(18:2(9Z,12Z)/18:2(9Z,12Z))	metab_10555	-	-	-	LMGP02010111;HMDB0009093	neg	-	-	-	-	Lipids and lipid-like molecules	Glycerophospholipids	738.508	M-H	C41H74NO8P	10.3561	0.103525	-	55.4	0.212847	-	Glycerophosphoethanolamines	1.4911	1.5807	1.4956	1.5894	1.4641	1.2723	1.4993	1.5132	1.6089	1.3582	1.6432	1.3899	1.3758	1.3413	1.2896
neg_2854	PC(18:2(9Z,12Z)/18:3(6Z,9Z,12Z))	metab_10559	-	-	-	LMGP01011625;HMDB0008140	neg	-	-	-	-	Lipids and lipid-like molecules	Glycerophospholipids	824.544	M+FA-H	C44H78NO8P	10.403	0.0177819	-	53.4	-1.42115	-	Glycerophosphocholines	3.6407	3.668	3.7085	3.7173	3.788	3.7208	3.761	3.7126	3.7147	3.7143	3.7771	3.7077	3.7113	3.7259	3.7146
neg_2873	SM(d18:1/14:0)	metab_10578	-	-	-	LMSP03010028;HMDB0012097	neg	-	-	-	-	Lipids and lipid-like molecules	Sphingolipids	719.535	M+FA-H	C37H75N2O6P	10.6368	0.137518	-	88	0.281735	-	Phosphosphingolipids	1.9574	1.9203	1.9566	1.997	2.0041	1.9995	1.8216	1.7963	1.9172	1.7658	1.7423	1.8098	2.0046	1.8899	1.9308
neg_2874	L-alpha-Phosphatidylethanolamine	metab_10579	-	-	-	-	neg	-	-	-	-	-	-	714.506	M-H	C39H74NO8P	10.6461	0.142435	80.2	-	-2.74251	-	-	1.3974	1.5562	1.6343	1.2819	1.5139	1.6468	1.5903	1.4444	1.6917	1.5037	1.6309	1.5089	1.5435	1.4235	1.508
neg_2879	PC(18:2(9Z,12Z)/22:5(4Z,7Z,10Z,13Z,16Z))	metab_10584	-	-	-	LMGP01010946;HMDB0008154	neg	-	-	-	-	Lipids and lipid-like molecules	Glycerophospholipids	876.576	M+FA-H	C48H82NO8P	10.6833	0.228989	-	66.2	0.526607	-	Glycerophosphocholines	2.3082	2.2369	2.2615	2.364	2.3481	2.273	2.171	2.501	2.2552	2.3524	2.2762	2.4443	2.379	2.178	2.2874
neg_2884	PS(18:3(9Z,12Z,15Z)/20:0)	metab_10589	-	-	-	HMDB0112471;LMGP03010413	neg	-	-	-	-	Lipids and lipid-like molecules	Glycerophospholipids	812.543	M-H	C44H80NO10P	10.7481	0.0825421	-	89.6	-1.5477	-	Glycerophosphoserines	2.2339	2.2757	2.354	2.4869	2.4652	2.3408	2.2093	2.197	2.2524	2.2121	2.1565	2.5944	2.297	2.278	2.2268
neg_2887	20-Hydroxy-PGF2a	metab_10592	-	-	-	HMDB0004049	neg	-	-	-	-	Lipids and lipid-like molecules	Fatty Acyls	407.185	M+K-2H	C20H34O6	10.8599	0.178841	-	79	2.60764	-	Eicosanoids	1.6554	1.6359	1.9519	1.6197	1.1018	1.4186	1.2327	1.5605	1.4491	0.693	1.4737	1.2532	1.7636	1.6807	1.8348
neg_2893	PS(20:3(8Z,11Z,14Z)/22:6(4Z,7Z,10Z,13Z,16Z,19Z))	metab_10598	-	-	-	HMDB0012428;LMGP03010619	neg	-	-	-	-	Lipids and lipid-like molecules	Glycerophospholipids	902.521	M+FA-H	C48H76NO10P	10.8969	0.114486	-	69.7	2.20972	-	Glycerophosphoserines	2.1967	2.212	2.1925	2.3585	2.2715	2.2886	2.0269	2.0672	2.339	1.9183	2.1107	2.3859	2.2456	2.1464	2.1985
neg_2894	DG(18:4(6Z,9Z,12Z,15Z)/24:1(15Z)/0:0)	metab_10599	-	-	-	HMDB0007355	neg	-	-	-	-	Lipids and lipid-like molecules	Glycerolipids	733.549	M+Cl	C45H78O5	10.9069	0.262573	-	52.1	-7.88056	-	Diradylglycerols	1.7175	1.8285	1.7291	1.6376	1.9353	1.8522	1.5513	1.6822	1.6101	1.0888	1.5907	1.8033	1.8486	1.6962	1.9286
neg_2895	PC(20:4(5Z,8Z,11Z,14Z)/P-18:1(11Z))	metab_10600	-	-	-	HMDB0008457	neg	-	-	-	-	Lipids and lipid-like molecules	Glycerophospholipids	836.581	M+FA-H	C46H82NO7P	10.9254	0.0990301	-	88.6	-0.236316	-	Glycerophosphocholines	0.9091	1.313	1.0118	1.8515	1.9658	1.4428	1.6835	1.5093	1.693	1.0901	1.2907	1.1671	1.4143	1.3371	1.4064
neg_2907	PC(20:4(5Z,8Z,11Z,14Z)/P-16:0)	metab_10612	-	-	-	HMDB0008455	neg	-	-	-	-	Lipids and lipid-like molecules	Glycerophospholipids	810.565	M+FA-H	C44H80NO7P	11.2424	0.0792424	-	72.5	-0.794164	-	Glycerophosphocholines	2.0787	2.2222	2.099	2.3944	2.4663	2.2221	2.0696	2.2173	2.1895	2.0868	2.2513	2.106	2.1787	2.1773	2.236
neg_2911	PC(20:4(5Z,8Z,11Z,14Z)/P-18:0)	metab_10616	-	-	-	HMDB0008456	neg	-	-	-	-	Lipids and lipid-like molecules	Glycerophospholipids	838.595	M+FA-H	C46H84NO7P	11.3834	0.0518856	-	72.4	-1.9829	-	Glycerophosphocholines	2.5531	2.5311	2.4784	2.7864	2.7912	2.6047	2.5448	2.625	2.5728	2.5327	2.6491	2.6038	2.5962	2.5512	2.5752
neg_2912	PC(o-16:0/20:4(8Z,11Z,14Z,17Z))	metab_10617	-	-	-	HMDB0013407;LMGP01020245	neg	-	-	-	-	Lipids and lipid-like molecules	Glycerophospholipids	812.581	M+FA-H	C44H82NO7P	11.4117	0.0486124	-	62.5	-0.477833	-	Glycerophosphocholines	2.6657	2.6769	2.5863	2.8317	2.8859	2.7636	2.5848	2.687	2.6825	2.5828	2.6749	2.5302	2.6283	2.6166	2.6572
neg_2922	PC(O-16:0/18:2(9Z,12Z))	metab_10627	-	-	-	LMGP01020039;HMDB0011151	neg	-	-	-	-	Lipids and lipid-like molecules	Glycerophospholipids	788.581	M+FA-H	C42H82NO7P	11.609	0.12123	-	87.6	0.395386	88542-95-4	Glycerophosphocholines	2.4116	2.615	2.5998	2.4385	2.6041	2.6672	2.3893	2.55	2.5088	2.3392	2.3751	2.0501	2.4822	2.3766	2.4411
neg_2924	PE(15:0/22:1(13Z))	metab_10629	-	-	-	HMDB0008908	neg	-	-	-	-	Lipids and lipid-like molecules	Glycerophospholipids	804.574	M+FA-H	C42H82NO8P	11.6464	0.0274005	-	60.9	-2.62723	-	Glycerophosphoethanolamines	3.5767	3.62	3.615	3.4456	3.5661	3.6827	3.5503	3.658	3.5179	3.7046	3.5983	3.5314	3.5725	3.5536	3.5758
neg_2929	PC(18:0/18:2(9Z,12Z))	metab_10634	-	-	-	LMGP01010768;HMDB0008039	neg	-	-	-	-	Lipids and lipid-like molecules	Glycerophospholipids	820.563	M+Cl	C44H84NO8P	11.8255	0.0604906	-	99.4	-0.296729	-	Glycerophosphocholines	2.3146	2.3708	2.4029	2.5592	2.482	2.4599	2.2374	2.2859	2.4052	2.2727	2.348	2.4371	2.3782	2.3523	2.3259
neg_2934	PC(18:0/22:4(7Z,10Z,13Z,16Z))	metab_10639	-	-	-	LMGP01010813;HMDB0008054	neg	-	-	-	-	Lipids and lipid-like molecules	Glycerophospholipids	882.62	M+FA-H	C48H88NO8P	12.086	0.297343	-	85.8	-3.69964	-	Glycerophosphocholines	2.0399	1.8374	1.0483	2.2797	2.0091	1.5587	2.1039	1.5584	1.784	1.8026	2.0591	2.157	1.5127	1.4017	1.6508
neg_2940	PC(14:0/22:1(13Z))	metab_10645	map01100;map00564;map00590;map00591;map00592;map05231;map04723	Metabolic pathways;Glycerophospholipid metabolism;Arachidonic acid metabolism;Linoleic acid metabolism;alpha-Linolenic acid metabolism;Choline metabolism in cancer;Retrograde endocannabinoid signaling	C00157	HMDB0007887;LMGP01012129	neg	Lipids	Phospholipids	Metabolism;Metabolism;Metabolism;Metabolism;Metabolism;Human Diseases;Organismal Systems	Global and overview maps;Lipid metabolism;Lipid metabolism;Lipid metabolism;Lipid metabolism;Cancers: Overview;Nervous system	Lipids and lipid-like molecules	Glycerophospholipids	832.605	M+FA-H	C44H86NO8P	12.5261	0.126222	-	78.2	-2.41076	-	Glycerophosphocholines	2.7786	2.5815	2.1665	2.6358	2.6291	2.6542	2.769	2.8835	2.4561	2.8146	2.9236	2.8088	2.5571	2.454	2.4812
neg_3255	1-Stearoylglycerophosphoglycerol	metab_10960	-	-	-	HMDB0061697	neg	-	-	-	-	Lipids and lipid-like molecules	Glycerophospholipids	511.301	M-H	C24H49O9P	12.086	0.238896	-	98.9	-7.08935	-	Glycerophosphoglycerols	1.3247	1.6294	1.7556	1.8291	1.497	1.6359	1.6814	1.5538	1.7641	1.5845	1.5077	1.6453	1.4779	1.515	1.6606
neg_3259	PC(18:0/20:3(5Z,8Z,11Z))	metab_10964	-	-	-	LMGP01010796;HMDB0008046	neg	-	-	-	-	Lipids and lipid-like molecules	Glycerophospholipids	856.606	M+FA-H	C46H86NO8P	11.9382	0.0388146	-	90.2	-2.17468	-	Glycerophosphocholines	2.7047	2.5396	2.3445	2.4902	2.6044	2.4858	2.5881	2.6812	2.4936	2.6617	2.7605	2.7167	2.4058	2.3908	2.4242
neg_3267	PC(18:2(9Z,12Z)/P-18:0)	metab_10972	-	-	-	HMDB0008160	neg	-	-	-	-	Lipids and lipid-like molecules	Glycerophospholipids	814.595	M+FA-H	C44H84NO7P	11.609	0.150509	-	85.6	-1.99491	-	Glycerophosphocholines	1.9645	1.9967	2.0133	2.012	2.2339	2.2523	1.91	2.0532	2.0615	1.7846	1.9576	1.5047	1.955	1.9403	2.0551
neg_3268	PE(18:2(9Z,12Z)/P-16:0)	metab_10973	-	-	-	HMDB0009114	neg	-	-	-	-	Lipids and lipid-like molecules	Glycerophospholipids	698.511	M-H	C39H74NO7P	11.609	0.254923	-	53.3	-2.33591	-	Glycerophosphoethanolamines	2.3997	2.5206	1.8602	2.334	2.4638	2.5218	2.3914	2.1471	2.3188	2.46	2.3845	1.8553	2.1571	2.1767	2.3467
neg_3270	PC(18:0/22:5(4Z,7Z,10Z,13Z,16Z))	metab_10975	-	-	-	HMDB0008055;LMGP01010816	neg	-	-	-	-	Lipids and lipid-like molecules	Glycerophospholipids	880.608	M+FA-H	C48H86NO8P	11.5292	0.132969	-	98.3	1.13614	-	Glycerophosphocholines	1.9044	1.7252	1.784	2.0541	2.0023	1.8602	1.822	1.9571	1.808	1.9692	1.8128	1.9197	1.8838	1.776	1.8729
neg_3274	PE(18:0/20:2(11Z,14Z))	metab_10979	-	-	-	HMDB0009000;LMGP02010124	neg	-	-	-	-	Lipids and lipid-like molecules	Glycerophospholipids	816.575	M+FA-H	C43H82NO8P	11.4451	0.0302671	-	69.9	-1.55535	-	Glycerophosphoethanolamines	3.17	3.1377	3.1751	3.1213	3.2481	3.2734	3.1081	3.0494	3.2286	3.1153	3.1104	3.1467	3.0754	3.0505	3.0706
neg_3284	PE(18:0/18:1(11Z))	metab_10989	-	-	-	HMDB0008992	neg	-	-	-	-	Lipids and lipid-like molecules	Glycerophospholipids	790.557	M+FA-H	C41H80NO8P	11.3647	0.165472	-	65.7	-5.03024	-	Glycerophosphoethanolamines	2.6388	2.5871	2.6104	2.5284	2.5584	2.6536	2.5025	2.6024	2.4766	2.6216	2.5554	2.6355	2.5691	2.4964	2.6403
neg_3287	PE(20:0/20:4(5Z,8Z,11Z,14Z))	metab_10992	-	-	-	LMGP02011177;HMDB0009234	neg	-	-	-	-	Lipids and lipid-like molecules	Glycerophospholipids	840.575	M+FA-H	C45H82NO8P	11.2662	0.12316	-	51.1	-1.16334	-	Glycerophosphoethanolamines	2.0551	2.0549	1.9758	2.2712	2.2171	1.965	1.7176	1.9421	2.108	1.826	1.9333	2.4753	1.9391	1.9949	2.0454
neg_3293	TG(8:0/8:0/8:0)	metab_10998	-	-	C13044	HMDB0011187	neg	-	-	-	-	Lipids and lipid-like molecules	Glycerolipids	491.34	M+Na-2H	C27H50O6	11.1211	0.0867908	-	68.1	9.45925	538-23-8	Triradylcglycerols	1.105	1.1401	1.0276	1.1251	1.184	1.196	0.914	1.0975	1.2161	0.2944	1.2558	1.3232	1.3141	1.3335	1.3829
neg_3296	PC(14:0/18:1(11Z))	metab_11001	-	-	-	HMDB0007872;LMGP01010490	neg	-	-	-	-	Lipids and lipid-like molecules	Glycerophospholipids	776.546	M+FA-H	C40H78NO8P	11.0511	0.0779252	-	75	1.34331	-	Glycerophosphocholines	2.1365	2.1468	1.9835	1.7309	2.0655	2.2196	1.9782	2.2469	2.1366	2.1822	2.2644	1.8798	2.1332	2.144	2.0799
neg_3298	PC(18:1(11Z)/20:4(5Z,8Z,11Z,14Z))	metab_11003	-	-	-	HMDB0008081;LMGP01012156	neg	-	-	-	-	Lipids and lipid-like molecules	Glycerophospholipids	852.575	M+FA-H	C46H82NO8P	11.0086	0.0869724	-	63.5	-1.47474	-	Glycerophosphocholines	3.3299	3.2915	3.2983	3.3431	3.3459	3.2785	3.2494	3.3665	3.3733	3.3504	3.335	3.3944	3.3073	3.2727	3.348
neg_3301	PC(18:2(9Z,12Z)/22:4(7Z,10Z,13Z,16Z))	metab_11006	-	-	-	HMDB0008153;LMGP01011639	neg	-	-	-	-	Lipids and lipid-like molecules	Glycerophospholipids	878.593	M+FA-H	C48H84NO8P	10.9254	0.149646	-	99.4	1.04343	-	Glycerophosphocholines	1.9786	1.8234	1.844	1.9119	1.7881	1.6628	2.0085	1.7888	2.0417	1.8091	1.9378	1.9673	1.9575	1.9608	1.8423
neg_3302	PE(18:3(6Z,9Z,12Z)/20:0)	metab_11007	-	-	-	HMDB0009130;LMGP02010698	neg	-	-	-	-	Lipids and lipid-like molecules	Glycerophospholipids	814.559	M+FA-H	C43H80NO8P	10.9069	0.14078	-	61.5	-1.95993	-	Glycerophosphoethanolamines	2.6047	2.6822	2.6383	2.518	2.692	2.696	2.6426	2.7352	2.7378	2.6907	2.7767	2.5692	2.6604	2.5973	2.7199
neg_3324	PE(15:0/20:2(11Z,14Z))	metab_11029	-	-	-	HMDB0008901;LMGP02010465	neg	-	-	-	-	Lipids and lipid-like molecules	Glycerophospholipids	774.528	M+FA-H	C40H76NO8P	10.6461	0.0251823	-	73.6	-1.66438	-	Glycerophosphoethanolamines	2.7355	2.7989	2.7236	2.7197	2.7835	2.78	2.8218	2.7415	2.845	2.7551	2.7327	2.7366	2.7312	2.7235	2.745
neg_3326	PC(20:4(5Z,8Z,11Z,14Z)/22:5(4Z,7Z,10Z,13Z,16Z))	metab_11031	-	-	-	HMDB0008450	neg	-	-	-	-	Lipids and lipid-like molecules	Glycerophospholipids	900.576	M+FA-H	C50H82NO8P	10.6181	0.187452	-	99.5	-0.292516	-	Glycerophosphocholines	1.4828	1.4258	1.1897	1.9775	1.8156	1.4872	1.8631	1.608	1.0825	1.6212	1.673	1.9581	1.5345	1.614	1.4552
neg_3327	PC(18:2(9Z,12Z)/20:4(5Z,8Z,11Z,14Z))	metab_11032	map01100;map00564;map00590;map00591;map00592;map05231;map04723	Metabolic pathways;Glycerophospholipid metabolism;Arachidonic acid metabolism;Linoleic acid metabolism;alpha-Linolenic acid metabolism;Choline metabolism in cancer;Retrograde endocannabinoid signaling	C00157	HMDB0008147;LMGP01010943	neg	Lipids	Phospholipids	Metabolism;Metabolism;Metabolism;Metabolism;Metabolism;Human Diseases;Organismal Systems	Global and overview maps;Lipid metabolism;Lipid metabolism;Lipid metabolism;Lipid metabolism;Cancers: Overview;Nervous system	Lipids and lipid-like molecules	Glycerophospholipids	850.559	M+FA-H	C46H80NO8P	10.5996	0.0274998	-	68.2	-1.2147	-	Glycerophosphocholines	3.694	3.7403	3.7392	3.8154	3.8151	3.7535	3.6744	3.756	3.741	3.6925	3.7329	3.9274	3.7531	3.7517	3.7316
neg_3331	PE(16:1(9Z)/20:3(8Z,11Z,14Z))	metab_11036	-	-	-	LMGP02010532;HMDB0008969	neg	-	-	-	-	Lipids and lipid-like molecules	Glycerophospholipids	812.542	M+FA-H	C43H78NO8P	10.5576	0.0542611	-	80	-3.40859	-	Glycerophosphoethanolamines	1.4989	1.7053	1.8222	1.2878	1.7848	1.6188	1.9459	1.4884	1.7486	1.8751	1.6779	1.2013	1.3623	1.4074	1.3833
neg_3336	PE(15:0/22:4(7Z,10Z,13Z,16Z))	metab_11041	-	-	-	HMDB0008910;LMGP02010472	neg	-	-	-	-	Lipids and lipid-like molecules	Glycerophospholipids	798.529	M+FA-H	C42H76NO8P	10.5154	0.150723	-	98.8	-0.537906	-	Glycerophosphoethanolamines	2.3461	2.324	2.2239	2.3946	2.5195	2.4734	2.5548	2.3565	2.3276	2.421	2.345	2.4622	2.4443	2.341	2.3306
neg_3340	PE(MonoMe(11,5)/MonoMe(13,5))	metab_11045	-	-	-	HMDB0061532	neg	-	-	-	-	Lipids and lipid-like molecules	Glycerophospholipids	900.576	M+Na-2H	C49H86NO10P	10.4781	0.159484	-	70.1	3.16051	-	Glycerophosphoethanolamines	1.5282	1.4446	1.5114	1.7949	1.4693	1.4698	1.417	1.5138	1.2045	1.7325	1.5371	2.0092	1.4949	1.6298	1.595
neg_3342	PC(20:3(5Z,8Z,11Z)/20:5(5Z,8Z,11Z,14Z,17Z))	metab_11047	-	-	-	HMDB0008380	neg	-	-	-	-	Lipids and lipid-like molecules	Glycerophospholipids	874.56	M+FA-H	C48H80NO8P	10.4688	0.120079	-	77	-0.51892	-	Glycerophosphocholines	2.5999	2.5792	2.5309	2.8121	2.8078	2.7354	2.5154	2.7557	2.466	2.5611	2.6519	3.0671	2.781	2.6777	2.7233
neg_3351	PC(18:3(6Z,9Z,12Z)/16:1(9Z))	metab_11056	-	-	-	LMGP01011647;HMDB0008167	neg	-	-	-	-	Lipids and lipid-like molecules	Glycerophospholipids	798.529	M+FA-H	C42H76NO8P	10.3561	0.00924075	-	75.3	-0.569568	-	Glycerophosphocholines	2.4232	2.5744	2.6254	2.7081	2.6639	2.4915	2.7604	2.6312	2.6599	2.6097	2.8619	2.6922	2.632	2.6243	2.6299
neg_3358	PS(14:0/24:1(15Z))	metab_11063	-	-	-	HMDB0112307	neg	-	-	-	-	Lipids and lipid-like molecules	Glycerophospholipids	862.577	M+FA-H	C44H84NO10P	10.281	0.282438	-	57.6	-5.85179	-	Glycerophosphoserines	1.5041	2.0268	2.2123	1.9065	1.9257	1.7819	1.571	1.8952	1.2078	2.4479	2.0644	1.587	1.6367	1.8342	1.8864
neg_3370	Erinacine A	metab_11075	-	-	-	HMDB0040291	neg	-	-	-	-	Lipids and lipid-like molecules	Prenol lipids	431.245	M-H	C25H36O6	10.2048	0.241494	-	59.1	2.73647	-	Diterpenoids	0.8445	0.8377	0.5455	1.3706	0.5301	0.9878	0.7437	1.1888	0.7887	0.7596	1.4278	1.5413	1.0672	1.1648	0.9718
neg_3388	Dextrorphan O-glucuronide	metab_11093	-	-	-	HMDB0010341	neg	-	-	-	-	Alkaloids and derivatives	Morphinans	468.18	M+Cl	C23H31NO7	10.1378	0.0851853	-	55.9	2.09398	-	Not Available	2.0759	2.2364	2.0152	2.1417	2.1801	2.1403	2.1311	2.2093	2.3323	2.0123	2.3376	2.1931	2.2095	2.2084	2.1436
neg_3391	Melleolide	metab_11096	-	-	-	HMDB0035689	neg	-	-	-	-	Lipids and lipid-like molecules	Prenol lipids	399.183	M-H	C23H28O6	10.1378	0.0633869	-	90.5	3.79942	82869-08-7	Sesquiterpenoids	1.3207	1.432	1.0703	1.3318	1.4786	1.2398	1.3167	1.4009	1.1829	1.09	1.4113	1.4366	1.3624	1.3119	1.352
neg_3398	PC(14:1(9Z)/22:5(4Z,7Z,10Z,13Z,16Z))	metab_11103	-	-	-	HMDB0007923;LMGP01012134	neg	-	-	-	-	Lipids and lipid-like molecules	Glycerophospholipids	822.529	M+FA-H	C44H76NO8P	10.1283	0.0799349	-	96.2	0.034785	-	Glycerophosphocholines	1.9293	1.9699	1.9547	2.0756	2.3135	2.1787	2.3406	2.227	2.1983	2.0688	2.4804	1.9095	2.2839	2.2202	2.2787
neg_3428	2-Dodecylbenzenesulfonic acid	metab_11133	-	-	-	HMDB0031031	neg	-	-	-	-	Benzenoids	Benzene and substituted derivatives	651.377	2M-H	C18H30O3S	9.8787	0.223375	-	80.7	2.19076	-	Benzenesulfonic acids and derivatives	1.8912	0.8555	0.5845	1.6303	0.5511	1.3345	1.6017	1.5674	0.4057	1.0114	1.14	1.2779	1.6719	1.5636	1.7568
neg_3436	13'-Hydroxy-gamma-tocopherol	metab_11141	-	-	-	HMDB0012561	neg	-	-	-	-	Lipids and lipid-like molecules	Prenol lipids	477.357	M+FA-H	C28H48O3	9.8267	0.290436	-	66.1	-4.39202	-	Quinone and hydroquinone lipids	0.4077	0.4201	1.0757	0.9671	0.7342	1.2729	0.4259	0.9038	0.6701	1.0013	2.1942	1.9159	1.4979	1.5751	1.321
neg_3450	Cis-4,10,13,16-Docosatetraenoic Acid	metab_11155	-	-	-	-	neg	-	-	-	-	-	-	331.263	M-H	C22H36O2	9.7653	0.278572	53.2	-	-3.64864	-	-	0.534	1.117	0.8791	0.561	0.8442	0.8165	1.4667	1.2098	1.5532	1.2117	1.7241	1.3962	1.3536	1.1575	1.1777
neg_3497	Heliangin	metab_11202	-	-	C09474	HMDB0036692	neg	-	-	-	-	Lipids and lipid-like molecules	Fatty Acyls	361.165	M-H	C20H26O6	9.6567	0.155197	-	66.7	-1.87506	13323-48-3	Fatty acid esters	2.4368	2.2214	2.0386	2.1581	2.0897	2.0303	2.0062	2.3405	2.0337	1.8085	2.2377	2.1345	2.2396	2.105	2.2011
neg_3505	LysoPC(20:0/0:0)	metab_11210	map00564;map05231	Glycerophospholipid metabolism;Choline metabolism in cancer	C04230	HMDB0010390	neg	Lipids	Phospholipids	Metabolism;Human Diseases	Lipid metabolism;Cancers: Overview	Lipids and lipid-like molecules	Glycerophospholipids	596.392	M+FA-H	C28H58NO7P	9.6373	0.0631947	-	73.6	-2.94823	108341-80-6	Glycerophosphocholines	3.2516	3.2528	3.1336	3.0819	3.3293	3.2722	3.1394	3.2364	3.2345	3.3288	3.0879	3.0227	3.1771	3.1792	3.2248
neg_3513	Butanoyl PAF	metab_11218	-	-	-	-	neg	-	-	-	-	-	-	586.362	M+Cl	C28H58NO7P	9.6182	0.161513	84.9	-	-4.7053	-	-	1.22	1.5702	1.4097	1.4822	1.7788	1.6273	1.4372	1.6671	1.4867	1.7708	1.4677	1.3874	1.5163	1.4588	1.5934
neg_3515	PS(18:0/18:2(9Z,12Z))	metab_11220	-	-	-	LMGP03010031;HMDB0012380	neg	-	-	-	-	Lipids and lipid-like molecules	Glycerophospholipids	832.534	M+FA-H	C42H78NO10P	9.6085	0.115829	-	68.6	-1.10917	-	Glycerophosphoserines	0.2068	1.7347	2.5547	0.2214	1.4599	1.1567	0.9917	1.3533	1.6401	1.3058	0.2133	0.7027	1.2104	1.2546	1.1598
neg_3561	Lucidenic acid B	metab_11266	-	-	-	HMDB0037610	neg	-	-	-	-	Lipids and lipid-like molecules	Prenol lipids	455.248	M-H2O-H	C27H38O7	9.4794	0.0117804	-	57	8.30178	95311-95-8	Triterpenoids	2.5171	2.6038	2.6412	2.6226	2.5491	2.5569	2.5496	2.5904	2.6191	2.5774	2.5189	2.6142	2.6008	2.591	2.5938
neg_3646	LysoPE(0:0/22:0)	metab_11351	-	-	-	HMDB0011490;LMGP02050054	neg	-	-	-	-	Lipids and lipid-like molecules	Glycerophospholipids	582.376	M+FA-H	C27H56NO7P	9.2717	0.0197317	-	73.8	-3.97211	-	Glycerophosphoethanolamines	3.0969	3.1532	3.1761	2.9334	3.2647	3.136	3.0172	3.1021	3.0484	3.1922	3.1086	2.983	3.0955	3.1034	3.0863
neg_3673	13-hydroxyoctadecanoic acid	metab_11378	-	-	-	HMDB0061662	neg	-	-	-	-	Lipids and lipid-like molecules	Fatty Acyls	299.258	M-H	C18H36O3	9.1972	0.116994	-	74.6	-5.25306	-	Fatty acids and conjugates	2.3271	2.0551	1.907	2.1441	1.9539	1.8361	2.1902	1.8387	2.0572	1.9647	2.1709	2.0105	2.098	1.9997	2.078
neg_3701	LysoPC(18:0)	metab_11406	map00564;map05231	Glycerophospholipid metabolism;Choline metabolism in cancer	C04230	HMDB0010384	neg	Lipids	Phospholipids	Metabolism;Human Diseases	Lipid metabolism;Cancers: Overview	Lipids and lipid-like molecules	Glycerophospholipids	558.331	M+Cl	C26H54NO7P	9.0862	0.107189	-	71.5	-3.76683	-	Glycerophosphocholines	3.0028	3.2319	3.2195	3.1999	3.1608	3.1698	3.1417	3.1226	3.2362	3.069	3.0339	3.1966	3.0804	3.0847	3.1608
neg_3719	3-Methyl-5-pentyl-2-furanpentadecanoic acid	metab_11424	-	-	-	HMDB0112082	neg	-	-	-	-	Lipids and lipid-like molecules	Fatty Acyls	437.325	M+FA-H	C25H44O3	9.0395	0.170357	-	58.3	-6.12815	116627-44-2	Fatty acids and conjugates	2.4321	2.3246	2.1957	2.4101	2.3795	2.2841	2.343	2.3312	2.4083	2.47	2.248	2.3199	2.3172	2.3557	2.456
neg_3726	2-Hydroxy-6-pentadecylbenzoic acid	metab_11431	-	-	C10759	LMPK15040002;HMDB0029683	neg	-	-	-	-	Benzenoids	Benzene and substituted derivatives	347.258	M-H	C22H36O3	9.0117	0.130834	-	94.3	-4.14947	16611-84-0	Benzoic acids and derivatives	1.7939	2.0118	1.4803	1.8557	1.8686	1.8261	2.1303	1.903	1.9199	1.5983	1.8799	2.0339	1.8963	1.9409	1.8277
neg_3741	Momoridcin	metab_11446	-	-	-	HMDB0030512	neg	-	-	-	-	Lipids and lipid-like molecules	Prenol lipids	505.35	M+Cl	C31H50O3	8.9644	0.177054	-	57.4	9.26205	-	Triterpenoids	1.8618	1.6563	1.9855	1.4577	2.009	1.7706	1.5419	1.8096	2.0307	1.6392	1.5014	1.3423	1.7847	1.6477	1.7883
neg_3767	Eicosapentaenoic acid	metab_11472	map01040	Biosynthesis of unsaturated fatty acids	C06428	HMDB0001999	neg	Lipids	Fatty acids	Metabolism	Lipid metabolism	Lipids and lipid-like molecules	Fatty Acyls	301.216	M-H	C20H30O2	8.9261	0.019093	-	53.7	-4.59535	10417-94-4	Fatty acids and conjugates	3.2836	3.0474	2.9102	3.081	2.8601	2.7771	3.1335	2.9162	3.0751	2.8502	3.1319	3.428	3.0706	3.0592	3.0753
neg_3769	LysoPE(0:0/22:6(4Z,7Z,10Z,13Z,16Z,19Z))	metab_11474	-	-	-	LMGP02050060;HMDB0011496	neg	-	-	-	-	Lipids and lipid-like molecules	Glycerophospholipids	570.279	M+FA-H	C27H44NO7P	8.9166	0.185991	-	78.4	-9.23398	-	Glycerophosphoethanolamines	1.0232	1.1328	0.8898	1.443	1.1113	1.6532	1.5457	1.3853	1.3808	1.0676	1.3647	1.3538	1.2103	1.2869	1.3642
neg_3770	LysoPC(18:1(9Z))	metab_11475	map00564;map05231	Glycerophospholipid metabolism;Choline metabolism in cancer	C04230	HMDB0002815	neg	Lipids	Phospholipids	Metabolism;Human Diseases	Lipid metabolism;Cancers: Overview	Lipids and lipid-like molecules	Glycerophospholipids	520.337	M-H	C26H52NO7P	8.9166	0.0715722	-	99	-6.84894	3542-29-8	Glycerophosphocholines	2.0934	1.748	1.7613	1.0852	1.8944	1.7394	1.6013	1.9064	1.6692	1.9296	1.7916	1.6839	1.8109	1.7923	1.7504
neg_3778	LysoPE(0:0/22:1(13Z))	metab_11483	-	-	-	LMGP02050055;HMDB0011491	neg	-	-	-	-	Lipids and lipid-like molecules	Glycerophospholipids	580.36	M+FA-H	C27H54NO7P	8.8977	0.0346559	-	82.2	-4.59138	-	Glycerophosphoethanolamines	3.1651	3.1304	3.1139	2.6858	3.1195	3.1643	3.012	3.2247	3.0177	3.2518	3.045	2.9026	3.0618	3.0587	3.0859
neg_3783	LysoPE(20:4(8Z,11Z,14Z,17Z)/0:0)	metab_11488	-	-	-	LMGP02050067;HMDB0011518	neg	-	-	-	-	Lipids and lipid-like molecules	Glycerophospholipids	546.282	M+FA-H	C25H44NO7P	8.8884	0.12326	-	97.6	-4.30942	-	Glycerophosphoethanolamines	1.3297	1.5199	1.1317	1.262	1.3961	1.8226	1.9622	1.7013	1.5154	1.4463	1.7057	1.4612	1.5865	1.6746	1.5872
neg_3813	12-Hydroxy-8,10-octadecadienoic acid	metab_11518	-	-	-	HMDB0029998	neg	-	-	-	-	Lipids and lipid-like molecules	Fatty Acyls	295.227	M-H	C18H32O3	8.7947	0.0642379	-	52.2	-4.52981	170171-31-0	Lineolic acids and derivatives	2.3847	2.3661	2.1753	2.1345	2.04	1.9405	2.6193	1.9523	2.3113	1.9858	2.7548	2.2865	2.3222	2.3632	2.3762
neg_3818	Lyso-PAF C-16	metab_11523	-	-	-	-	neg	-	-	-	-	-	-	516.319	M+Cl	C24H52NO6P	8.7852	0.0644635	85.7	-	-6.91974	-	-	2.3957	2.4704	2.4806	2.4637	2.4894	2.5365	2.3335	2.3822	2.4477	2.3389	2.3406	2.424	2.399	2.4542	2.4219
neg_3833	Avenestergenin A1	metab_11538	-	-	-	HMDB0035264	neg	-	-	-	-	Lipids and lipid-like molecules	Prenol lipids	636.385	M-H	C38H55NO7	8.7477	0.274151	-	65.6	-9.24311	90578-35-1	Triterpenoids	2.0061	1.6488	1.5878	1.444	1.523	1.6724	1.368	1.7665	1.2309	1.5129	1.832	1.6244	1.5667	1.7923	1.6505
neg_3840	PE(18:1(9Z)/0:0)	metab_11545	-	-	-	LMGP02050004	neg	-	-	-	-	-	-	478.292	M-H	C23H46NO7P	8.7199	0.0239517	91.9	-	-4.88378	-	-	4.314	4.3164	4.3383	4.2547	4.3249	4.4388	4.3277	4.374	4.2602	4.4411	4.283	4.2477	4.3124	4.33	4.3311
neg_3855	LysoPE(22:4(7Z,10Z,13Z,16Z)/0:0)	metab_11560	-	-	-	HMDB0011523	neg	-	-	-	-	Lipids and lipid-like molecules	Glycerophospholipids	528.307	M-H	C27H48NO7P	8.6829	0.0177305	-	55	-5.04119	-	Glycerophosphoethanolamines	3.4328	3.3369	3.3758	3.2757	3.3431	3.3546	3.4066	3.3598	3.2265	3.5765	3.3301	3.6469	3.4099	3.3948	3.4049
neg_3890	LPC(16:0)	metab_11595	map00564;map05231	Glycerophospholipid metabolism;Choline metabolism in cancer	C04230	LMGP01050018	neg	Lipids	Phospholipids	Metabolism;Human Diseases	Lipid metabolism;Cancers: Overview	-	-	540.328	M+FA-H	C24H50NO7P	8.4981	0.00920657	53.5	-	-4.55285	-	-	4.9797	5.0631	5.1314	5.0479	5.037	5.1371	5.009	5.0689	5.0139	5.072	4.975	5.0893	5.0691	5.0622	5.0622
neg_3897	5(S)-HETrE	metab_11602	-	-	-	-	neg	-	-	-	-	-	-	321.242	M-H	C20H34O3	8.4604	0.18293	60	-	-4.76597	-	-	1.8297	2.2173	1.51	2.176	1.7908	2.0351	2.2748	2.2049	2.0538	1.9455	2.1984	1.9899	1.8756	2.0082	1.8805
neg_3908	2-Hydroxymyristic Acid	metab_11613	-	-	-	LMFA01050484;HMDB0002261	neg	-	-	-	-	Lipids and lipid-like molecules	Fatty Acyls	243.196	M-H	C14H28O3	8.4511	0.116338	69.3	-	-3.49871	2507-55-3	Fatty acids and conjugates	2.2059	2.5076	2.17	2.1947	2.3343	2.5363	2.4963	2.2469	2.3107	2.2061	2.4237	2.3108	2.3604	2.2942	2.2637
neg_3918	LysoPC(P-18:1(9Z))	metab_11623	map00564;map05231	Glycerophospholipid metabolism;Choline metabolism in cancer	C04230	HMDB0010408	neg	Lipids	Phospholipids	Metabolism;Human Diseases	Lipid metabolism;Cancers: Overview	Lipids and lipid-like molecules	Glycerophospholipids	550.349	M+FA-H	C26H52NO6P	8.4322	0.0296664	-	87.5	-4.62403	-	Glycerophosphocholines	2.6594	2.7914	2.7604	2.8739	2.8656	2.8041	2.7201	2.8882	2.8577	2.731	2.6363	2.7675	2.7617	2.7752	2.7875
neg_3931	Theasapogenol E	metab_11636	-	-	-	HMDB0034518	neg	-	-	-	-	Lipids and lipid-like molecules	Prenol lipids	503.335	M-H	C30H48O6	8.3953	0.219863	-	64.2	-6.46946	15399-41-4	Triterpenoids	2.3722	2.1516	1.9255	2.3783	2.1086	2.7058	2.8766	2.7884	2.6979	2.4742	2.325	2.3678	2.437	2.4539	2.6018
neg_3946	13,14-Dihydro PGF-1a	metab_11651	-	-	-	HMDB0005076	neg	-	-	-	-	Lipids and lipid-like molecules	Fatty Acyls	357.263	M-H	C20H38O5	8.3443	0.284403	-	57.8	-3.4834	-	Eicosanoids	1.4977	1.7089	0.4493	1.6154	1.6549	1.3359	2.566	0.854	1.8352	0.4617	2.3291	1.2058	1.8631	1.6491	1.6837
neg_3964	8(S)-HETrE	metab_11669	-	-	-	LMFA03050029	neg	-	-	-	-	-	-	321.242	M-H	C20H34O3	8.2981	0.270014	63.7	-	-4.67928	-	-	2.6656	2.3652	2.0025	2.4216	2.1242	2.654	2.2066	2.3384	2.5546	1.9255	2.0681	1.9782	2.1476	2.3207	2.3899
neg_3970	1-Oleoylglycerophosphoserine	metab_11675	-	-	-	HMDB0061694	neg	-	-	-	-	Lipids and lipid-like molecules	Glycerophospholipids	544.263	M+Na-2H	C24H46NO9P	8.2706	0.0468339	-	56.5	-5.0711	-	Glycerophosphoserines	2.754	2.9169	3.0918	3.0087	2.9616	2.9898	2.8845	2.8214	2.8917	2.922	3.0034	2.9589	2.9455	2.9085	2.9426
neg_3973	Annocherin A	metab_11678	-	-	-	HMDB0033399	neg	-	-	-	-	Phenylpropanoids and polyketides	Flavonoids	857.542	2M+FA-H	C24H38O5	8.2614	0.197444	-	56.8	-0.0748019	218281-62-0	Flavonoid glycosides	2.5292	2.5579	2.5056	2.6663	2.6143	2.84	2.6343	2.9129	2.6994	2.5471	2.9072	2.9353	2.7146	2.8628	2.7286
neg_3978	LysoPC(22:5(7Z,10Z,13Z,16Z,19Z))	metab_11683	map00564;map05231	Glycerophospholipid metabolism;Choline metabolism in cancer	C04230	HMDB0010403;LMGP01050143	neg	Lipids	Phospholipids	Metabolism;Human Diseases	Lipid metabolism;Cancers: Overview	Lipids and lipid-like molecules	Glycerophospholipids	614.344	M+FA-H	C30H52NO7P	8.2338	0.0504776	-	72.6	-3.60867	-	Glycerophosphocholines	3.1568	3.3321	3.3292	3.1673	3.3788	3.2811	2.9905	3.315	3.2864	3.3693	3.1244	3.3288	3.282	3.2647	3.2382
neg_3992	PS(18:3(6Z,9Z,12Z)/22:1(13Z))	metab_11697	-	-	-	HMDB0112461	neg	-	-	-	-	Lipids and lipid-like molecules	Glycerophospholipids	838.56	M-H	C46H82NO10P	8.1421	0.165683	-	58.5	0.0532033	-	Glycerophosphoserines	2.8599	2.941	2.7606	3.0323	2.708	3.1824	3.1978	3.0926	3.1653	3.1111	3.2167	2.8	2.9641	3.0619	2.9264
neg_4000	Cortolone	metab_11705	map00140	Steroid hormone biosynthesis	C05481	HMDB0003128	neg	-	-	Metabolism	Lipid metabolism	Lipids and lipid-like molecules	Steroids and steroid derivatives	387.213	M+Na-2H	C21H34O5	8.1279	0.139554	-	57.9	-6.81547	516-42-7	Hydroxysteroids	1.7644	2.2544	2.2661	2.4504	2.0972	2.474	2.4591	2.4572	2.3988	2.2038	2.1651	2.2297	2.3199	2.2398	2.3614
neg_4028	LPC(18:2)	metab_11733	-	-	-	-	neg	-	-	-	-	-	-	564.328	M+FA-H	C26H50NO7P	8.0453	0.0256727	57	-	-4.35386	-	-	4.6069	4.7066	4.7088	4.4946	4.6563	4.6862	4.3849	4.6205	4.5286	4.7059	4.4696	4.6008	4.5848	4.607	4.5943
neg_4040	LysoPC(20:4(5Z,8Z,11Z,14Z))	metab_11745	map00564;map05231	Glycerophospholipid metabolism;Choline metabolism in cancer	C04230	HMDB0010395	neg	Lipids	Phospholipids	Metabolism;Human Diseases	Lipid metabolism;Cancers: Overview	Lipids and lipid-like molecules	Glycerophospholipids	578.299	M+Cl	C28H50NO7P	8.0081	0.0939938	-	66.7	-5.13349	-	Glycerophosphocholines	2.1744	2.2566	2.3029	2.2232	2.354	2.3025	1.788	2.2482	2.2416	2.2149	2.1226	2.4379	2.2312	2.1613	2.1642
neg_4050	13S-hydroxyoctadecadienoic acid	metab_11755	map00591;map03320	Linoleic acid metabolism;PPAR signaling pathway	C14762	HMDB0004667	neg	-	-	Metabolism;Organismal Systems	Lipid metabolism;Endocrine system	Lipids and lipid-like molecules	Fatty Acyls	341.232	M+FA-H	C18H32O3	7.9614	0.163537	-	63.9	-5.26317	5204-88-6	Lineolic acids and derivatives	2.2927	1.7264	1.595	1.8518	1.6526	1.5249	0.7133	1.3821	1.6286	1.583	0.7353	1.9132	1.6523	1.5193	1.6377
neg_4054	Chondroitin D-glucuronate	metab_11759	-	-	-	HMDB0060454	neg	-	-	-	-	Organic oxygen compounds	Organooxygen compounds	430.133	M+Na-2H	C16H27NO11	7.9563	0.101136	-	97.9	0.146423	-	Carbohydrates and carbohydrate conjugates	2.0029	1.9725	1.1047	1.9553	1.7463	0.9097	2.349	0.9058	2.1915	0.6521	2.3097	1.1695	2.3312	2.2934	2.2434
neg_4057	LysoPC(22:6(4Z,7Z,10Z,13Z,16Z,19Z))	metab_11762	map00564;map05231	Glycerophospholipid metabolism;Choline metabolism in cancer	C04230	HMDB0010404	neg	Lipids	Phospholipids	Metabolism;Human Diseases	Lipid metabolism;Cancers: Overview	Lipids and lipid-like molecules	Glycerophospholipids	612.328	M+FA-H	C30H50NO7P	7.9373	0.0386995	-	84.6	-4.79822	-	Glycerophosphocholines	1.9127	1.977	2.1503	1.8591	2.2029	2.2014	0.7548	2.0302	1.4807	2.0726	1.1549	2.2432	1.7796	1.7596	1.7925
neg_4063	9,12,13-TriHOME	metab_11768	map00591	Linoleic acid metabolism	C14833	HMDB0004708;LMFA02000014	neg	-	-	Metabolism	Lipid metabolism	Lipids and lipid-like molecules	Fatty Acyls	329.232	M-H	C18H34O5	7.9278	0.083927	-	86.1	-4.27927	-	Fatty acids and conjugates	1.1216	1.6113	0.6951	0.6271	1.1329	0.7585	1.8662	0.2467	1.99	0.2442	2.2612	0.6524	1.5193	1.5036	1.5701
neg_4066	Homodolichosterone	metab_11771	-	-	-	HMDB0034079	neg	-	-	-	-	Lipids and lipid-like molecules	Steroids and steroid derivatives	521.344	M+FA-H	C29H48O5	7.9181	0.0720169	-	96.4	-9.80333	85797-14-4	Stigmastanes and derivatives	1.5591	1.2675	1.7709	1.5811	1.9315	1.7785	1.4839	1.712	1.4816	1.6393	1.3106	1.3876	1.3179	1.3672	1.3151
neg_4094	3-Oxotetradecanoic acid	metab_11799	-	-	-	HMDB0010730	neg	-	-	-	-	Lipids and lipid-like molecules	Fatty Acyls	241.18	M-H	C14H26O3	7.8335	0.0577359	-	98	-3.56717	-	Fatty acids and conjugates	2.1748	1.9192	1.747	2.1736	1.8318	1.8495	1.9067	1.7939	2.1081	1.4973	2.0646	2.3608	2.02	1.9887	1.9713
neg_4101	9'-Carboxy-gamma-chromanol	metab_11806	-	-	-	HMDB0012868	neg	-	-	-	-	Organoheterocyclic compounds	Benzopyrans	421.258	M+FA-H	C23H36O4	7.8143	0.170685	-	89.2	-5.47512	1215088-64-4	1-benzopyrans	1.3393	1.0214	1.0517	1.1168	1.3299	0.985	1.1159	1.0355	1.4223	1.1582	1.1261	1.2838	1.1922	1.3165	1.2094
neg_4133	20,24-Epoxy-25,26-dihydroxydammaran-3-one	metab_11838	-	-	-	HMDB0039692	neg	-	-	-	-	Lipids and lipid-like molecules	Prenol lipids	509.344	M+Cl	C30H50O4	7.7284	0.258043	-	57.1	7.00939	146830-04-8	Terpene glycosides	1.6825	1.6534	1.5037	1.6263	2.0518	1.7223	1.5137	1.7461	1.6078	1.6745	0.9646	1.581	1.6399	1.4231	1.6179
neg_4137	Piperoic acid	metab_11842	-	-	-	HMDB0040619	neg	-	-	-	-	Lipids and lipid-like molecules	Prenol lipids	357.205	M-H	C22H30O4	7.7284	0.276397	-	60	-4.61672	110979-04-9	Sesquiterpenoids	0.8697	0.8743	0.5887	0.7244	0.3248	0.249	1.3337	0.3025	0.9922	0.3022	1.5755	0.5205	1.192	0.9641	1.1381
neg_4139	LysoPE(0:0/20:5(5Z,8Z,11Z,14Z,17Z))	metab_11844	-	-	-	LMGP02050053;HMDB0011489	neg	-	-	-	-	Lipids and lipid-like molecules	Glycerophospholipids	498.265	M-H	C25H42NO7P	7.719	0.122028	-	51.4	5.21606	-	Glycerophosphoethanolamines	0.9479	1.2759	1.1763	1.3665	1.2553	1.3685	0.8486	1.3141	1.1642	1.3461	1.3475	1.6789	1.2554	1.1609	1.1877
neg_4149	7'-Carboxy-gamma-tocotrienol	metab_11854	-	-	-	HMDB0012851	neg	-	-	-	-	Organoheterocyclic compounds	Benzopyrans	313.18	M-H2O-H	C20H28O4	7.6998	0.0726723	-	54.2	-2.08901	1221262-26-5	1-benzopyrans	2.7817	0.3017	0.3423	0.1664	0.1696	0.2914	0.1639	0.4987	0.8562	1.4053	0.16	0.7475	1.6638	1.6079	1.661
neg_4165	3-Hydroxydodecanoic acid	metab_11870	-	-	-	HMDB0000387	neg	-	-	-	-	Organic acids and derivatives	Hydroxy acids and derivatives	215.165	M-H	C12H24O3	7.671	0.145785	-	94.5	-3.02875	1883-13-2	Medium-chain hydroxy acids and derivatives	1.4904	1.4417	1.2387	1.3327	1.5456	1.2219	1.3667	1.4892	1.589	1.3501	1.3356	1.3654	1.4575	1.5773	1.5026
neg_4173	Valproic acid glucuronide	metab_11878	-	-	-	HMDB0000901	neg	-	-	-	-	Organic oxygen compounds	Organooxygen compounds	355.117	M+Cl	C14H24O8	7.6426	0.132592	-	95.3	0.0533076	60113-83-9	Carbohydrates and carbohydrate conjugates	1.4258	0.9849	1.1666	1.2717	1.1278	1.0804	1.823	1.2532	1.451	0.9399	0.9562	1.5351	1.1686	1.1762	1.0764
neg_4175	1-Heptadecanoylglycerophosphoethanolamine	metab_11880	-	-	-	HMDB0061691	neg	-	-	-	-	Lipids and lipid-like molecules	Glycerophospholipids	512.297	M+FA-H	C22H46NO7P	7.6331	0.0470159	-	71.7	-4.40898	-	Glycerophosphoethanolamines	2.8213	2.9099	2.9239	2.8024	2.9889	3.0399	2.7716	3.0055	2.8346	2.99	2.6192	2.8739	2.8007	2.8414	2.826
neg_4185	LPE(18:1)	metab_11890	-	-	-	-	neg	-	-	-	-	-	-	524.299	M+FA-H	C23H46NO7P	7.5954	0.114693	70.8	-	-0.717476	-	-	1.7607	1.9277	1.9949	1.7251	2.0561	2.1779	0.7044	2.0871	1.9	2.0364	1.2582	1.8021	1.7074	1.7404	1.6426
neg_4187	12(13)Ep-9-KODE	metab_11892	-	-	-	HMDB0013623	neg	-	-	-	-	Lipids and lipid-like molecules	Fatty Acyls	347.163	M+K-2H	C18H30O4	7.5954	0.20371	-	95.3	-1.20215	-	Fatty acids and conjugates	1.2708	1.144	0.5911	1.1721	1.0683	1.0839	1.5871	1.1016	1.3783	1.0282	1.8195	0.781	1.4478	1.3633	1.5346
neg_4188	Lacosamide-glucuronide	metab_11893	-	-	-	HMDB0060829	neg	-	-	-	-	Organic oxygen compounds	Organooxygen compounds	409.129	M-H2O-H	C18H24N2O10	7.5954	0.292539	-	61.3	8.70735	-	Carbohydrates and carbohydrate conjugates	1.6209	1.7786	0.6863	1.4707	0.8851	0.7272	2.4224	0.7138	1.9472	0.7015	2.5728	1.0803	1.85	1.9907	2.1074
neg_4189	Homodolicholide	metab_11894	-	-	-	HMDB0033907	neg	-	-	-	-	Organoheterocyclic compounds	Benzopyrans	537.339	M+FA-H	C29H48O6	7.586	0.0163108	-	68.7	-9.53896	86630-40-2	1-benzopyrans	1.7882	1.737	1.6983	1.7206	1.9339	1.6557	1.3169	1.7604	1.9048	1.761	0.6221	1.6417	1.548	1.5446	1.5347
neg_4207	9(S)-HOTrE	metab_11912	map00592	alpha-Linolenic acid metabolism	C16326	-	neg	-	-	Metabolism	Lipid metabolism	-	-	293.211	M-H	C18H30O3	7.5473	0.00937524	52.8	-	-4.96467	-	-	3.1806	2.8115	2.5091	2.5379	2.5227	2.3205	3.0476	2.4784	2.884	2.4531	3.1052	2.6985	2.803	2.8097	2.8023
neg_4226	3-keto-Digoxigenin	metab_11931	-	-	-	HMDB0060746	neg	-	-	-	-	Organoheterocyclic compounds	Benzodiazepines	775.44	2M-H	C23H32O5	7.4795	0.224635	-	92.3	-3.76906	-	1,4-benzodiazepines	0.6608	0.8844	0.4695	0.7196	1.1523	1.0159	1.1379	1.2566	1.2655	1.0076	1.0458	1.0361	0.9741	1.0254	1.1427
neg_4234	7alpha-hydroxy-3-oxochol-4-en-24-oic Acid	metab_11939	-	-	-	HMDB0062744;LMST04010239	neg	-	-	-	-	Lipids and lipid-like molecules	Steroids and steroid derivatives	433.257	M+FA-H	C24H36O4	7.4601	0.0229849	-	56	-5.79601	14772-95-3	Bile acids, alcohols and derivatives	2.5384	2.673	2.4837	2.4642	2.6122	2.4425	2.5409	2.4329	2.6201	2.4329	2.415	2.5504	2.5182	2.5187	2.5011
neg_4236	9-peroxy-5Z,7E,11Z,14Z-eicosatetraenoate	metab_11941	-	-	-	HMDB0060098	neg	-	-	-	-	Lipids and lipid-like molecules	Fatty Acyls	381.227	M+FA-H	C20H32O4	7.4506	0.151258	-	72.3	-4.00439	-	Fatty acids and conjugates	1.6922	0.8984	0.9865	0.7964	0.7799	0.8961	0.6416	0.3622	0.9002	0.7926	0.837	0.7152	0.9941	1.1014	1.1047
neg_4242	Jurubine	metab_11947	-	-	-	HMDB0034194;LMST01070002	neg	-	-	-	-	Lipids and lipid-like molecules	Steroids and steroid derivatives	632.355	M+K-2H	C33H57NO8	7.4218	0.0288588	-	55.4	-3.77276	14256-61-2	Steroidal glycosides	1.7835	1.8587	1.8937	1.7906	2.1615	2.246	1.8792	1.9334	1.4043	2.0932	1.5243	1.3677	1.9056	1.9072	1.8848
neg_4246	(-)-Pacifigorgiol	metab_11951	-	-	-	HMDB0035021	neg	-	-	-	-	Lipids and lipid-like molecules	Prenol lipids	267.195	M+FA-H	C15H26O	7.4218	0.115473	-	58	-7.34731	90988-77-5	Monoterpenoids	1.4221	1.3056	1.1075	0.8871	1.1818	0.8651	1.5092	1.0957	1.3994	0.977	1.9272	1.3987	1.3188	1.3911	1.3038
neg_4279	5-Oxo-6-trans-leukotriene B4	metab_11984	-	-	-	HMDB0012824;LMFA03020069	neg	-	-	-	-	Lipids and lipid-like molecules	Fatty Acyls	379.211	M+FA-H	C20H30O4	7.3396	0.123643	-	60.8	-5.92543	-	Eicosanoids	2.3324	0.7678	0.5926	0.3613	0.367	0.5492	0.3568	0.6142	0.5551	1.1122	1.2964	0.4366	1.2522	1.1546	1.235
neg_4280	9,10-DiHOME	metab_11985	map00591	Linoleic acid metabolism	C14828	LMFA02000229	neg	-	-	Metabolism	Lipid metabolism	-	-	313.237	M-H	C18H34O4	7.3396	0.0231921	54.6	-	-4.47003	-	-	2.9778	2.8435	2.56	2.3219	2.578	2.3572	2.9399	2.6607	2.9964	2.6579	2.8982	2.6779	2.7591	2.7637	2.7783
neg_4294	7a,12a-Dihydroxy-3-oxo-4-cholenoic acid	metab_11999	-	-	C15568	HMDB0000447	neg	-	-	-	-	Lipids and lipid-like molecules	Steroids and steroid derivatives	449.253	M+FA-H	C24H36O5	7.273	0.245582	-	73.9	-4.62941	13587-11-6	Bile acids, alcohols and derivatives	0.921	1.1537	0.8956	1.629	1.2298	1.3528	0.9992	1.1143	1.5279	0.8213	0.3816	1.3878	1.1214	0.9354	1.1156
neg_4306	(±)12,13-DiHOME	metab_12011	-	-	-	-	neg	-	-	-	-	-	-	313.237	M-H	C18H34O4	7.2442	0.0332643	77.4	-	-4.74426	-	-	3.1489	3.077	2.8003	2.657	2.8661	2.6631	3.1665	2.7502	3.0943	2.7538	3.0927	2.9934	2.9739	2.9521	2.9797
neg_4319	Ixabepilone	metab_12024	-	-	-	HMDB0015593	neg	-	-	-	-	Phenylpropanoids and polyketides	Macrolides and analogues	527.259	M+Na-2H	C27H42N2O5S	7.1875	0.0517302	-	56.8	6.44817	219989-84-1	Epothilones and analogues	1.8677	2.0258	2.0112	1.8895	1.9383	2.0644	1.7109	1.7684	2.0803	2.0239	1.9658	2.0786	1.9285	1.9178	1.9601
neg_4338	Retapamulin	metab_12043	-	-	-	HMDB0015386	neg	-	-	-	-	Lipids and lipid-like molecules	Prenol lipids	538.3	M+Na-2H	C30H47NO4S	7.1498	0.235196	-	57.2	5.07685	224452-66-8	Diterpenoids	1.8204	1.6357	1.523	1.8142	1.5859	1.6709	1.8375	1.9979	1.469	1.2894	1.767	1.281	1.7607	1.6085	1.8137
neg_4351	1b-Hydroxycholic acid	metab_12056	-	-	-	HMDB0000307	neg	-	-	-	-	Lipids and lipid-like molecules	Steroids and steroid derivatives	423.273	M-H	C24H40O6	7.1213	0.198068	-	57.2	-5.98397	80875-94-1	Bile acids, alcohols and derivatives	1.7058	1.2648	1.5318	0.9446	1.2127	1.8613	0.5725	1.6401	1.3789	1.3117	1.1475	0.5439	1.326	1.3427	1.4704
neg_4359	Mono-isopropyl-disopyramide	metab_12064	-	-	-	HMDB0061024	neg	-	-	-	-	Organic acids and derivatives	Carboxylic acids and derivatives	890.539	3M-H	C18H23N3O	7.0745	0.220573	-	90.4	-7.05832	-	Amino acids, peptides, and analogues	1.7294	1.8289	1.6356	1.9326	1.8618	1.6917	1.5073	1.4092	1.7383	1.8347	1.46	2.2232	1.6805	1.6359	1.8103
neg_4372	Tsugaric acid A	metab_12077	-	-	-	HMDB0032022	neg	-	-	-	-	Lipids and lipid-like molecules	Prenol lipids	533.344	M+Cl	C32H50O4	7.0455	0.09928	-	60.4	7.18988	-	Triterpenoids	1.0098	0.7312	0.7308	1.1931	1.2436	1.5256	0.9302	1.8254	1.2409	0.9827	0.5918	0.5718	1.0963	1.173	1.16
neg_4373	(12S,15S)-15-O-Demethyl-10,29-dideoxy-11,12-dihydro-striatin C	metab_12078	-	-	-	HMDB0033030	neg	-	-	-	-	Lipids and lipid-like molecules	Prenol lipids	433.259	M-H	C25H38O6	7.0455	0.205964	-	97.5	-1.18699	-	Diterpenoids	1.4442	1.501	1.3279	1.5541	1.6041	1.4501	1.3116	1.2774	1.4506	1.3875	1.2803	1.4485	1.4679	1.4756	1.312
neg_4381	Butyl 3-hydroxy-2-methylidenebutanoate	metab_12086	-	-	-	HMDB0040202	neg	-	-	-	-	Organic acids and derivatives	Hydroxy acids and derivatives	343.211	2M-H	C9H16O3	7.0167	0.110031	-	82.2	-4.3413	22141-40-8	Beta hydroxy acids and derivatives	1.4974	1.552	1.4102	1.4169	1.424	1.348	1.4097	1.5063	1.3779	1.5044	1.1016	1.478	1.3963	1.4363	1.3441
neg_4385	Neopetasitenine	metab_12090	-	-	-	HMDB0030329	neg	-	-	-	-	Organoheterocyclic compounds	Azaspirodecane derivatives	444.165	M+Na-2H	C21H29NO8	7.0068	0.0406663	-	65.1	1.99331	60409-51-0	Not Available	1.413	1.9884	1.143	2.0214	1.5057	1.8306	2.1062	1.7515	1.1202	1.9419	1.9253	1.2135	1.816	1.7868	1.8183
neg_4395	26-Methyl nigranoate	metab_12100	-	-	-	HMDB0033409	neg	-	-	-	-	Lipids and lipid-like molecules	Prenol lipids	519.327	M+Cl	C31H48O4	6.9685	0.186781	-	58.6	4.93337	212830-20-1	Triterpenoids	1.306	1.0105	1.3299	1.2317	1.1949	1.2555	1.2533	1.5688	1.2468	1.4489	0.8998	0.8762	1.2458	1.16	1.3148
neg_4405	Deoxycholic acid glycine conjugate	metab_12110	-	-	C05464	HMDB0000631;LMST05030006	neg	-	-	-	-	Lipids and lipid-like molecules	Steroids and steroid derivatives	448.306	M-H	C26H43NO5	6.9402	0.205683	-	99	-2.62141	360-65-6	Bile acids, alcohols and derivatives	2.2175	1.4917	0.7764	0.4589	0.0519	1.5213	0.4629	1.969	0.4024	0.0466	0.0485	0.8085	1.2708	1.4211	1.2909
neg_4418	9(S)-HpODE	metab_12123	map01100;map00591	Metabolic pathways;Linoleic acid metabolism	C14827	HMDB0006940	neg	-	-	Metabolism;Metabolism	Global and overview maps;Lipid metabolism	Lipids and lipid-like molecules	Fatty Acyls	311.221	M-H	C18H32O4	6.9115	0.112295	52.2	-	-4.52682	-	Lineolic acids and derivatives	3.0662	2.9014	2.6891	2.3968	2.755	2.5525	3.0202	2.5985	2.9152	2.6015	3.0266	2.7539	2.9091	2.8298	2.8246
neg_4436	Monomenthyl succinate	metab_12141	-	-	-	HMDB0036143	neg	-	-	-	-	Lipids and lipid-like molecules	Prenol lipids	237.149	M-H2O-H	C14H24O4	6.8683	0.0148998	-	59.3	-2.5682	188709-97-9	Monoterpenoids	1.8044	1.6437	1.566	1.8175	1.6981	1.6342	1.7399	1.5	1.7064	1.2843	1.7174	1.8513	1.6296	1.6421	1.6373
neg_4446	1-(11Z-eicosenoyl)-glycero-3-phosphate	metab_12151	-	-	-	HMDB0062305;LMGP10050026	neg	-	-	-	-	Lipids and lipid-like molecules	Glycerophospholipids	509.285	M+FA-H	C23H45O7P	6.849	0.0488588	-	62.9	-8.21606	-	Glycerophosphates	1.6824	2.1334	1.7604	1.8219	2.1507	1.6966	2.1358	1.8583	1.7905	1.6672	1.8224	1.3064	1.8286	1.8157	1.8563
neg_4465	Goshuyic acid	metab_12170	-	-	-	LMFA01030257;HMDB0000560	neg	-	-	-	-	Lipids and lipid-like molecules	Fatty Acyls	269.175	M+FA-H	C14H24O2	6.791	0.0178258	-	75.2	-4.71354	39039-37-7	Fatty acids and conjugates	1.7314	1.8597	1.817	2.078	1.762	1.6456	2.0362	1.9584	2.0319	1.8384	2.0054	1.6499	1.8688	1.8837	1.8793
neg_4470	6b-Angeloyl-3b,8b,9b-trihydroxy-7(11)-eremophilen-12,8-olide	metab_12175	-	-	-	HMDB0041228	neg	-	-	-	-	Lipids and lipid-like molecules	Prenol lipids	361.162	M-H2O-H	C20H28O7	6.7812	0.0474563	-	61.4	-9.555	171422-89-2	Terpene lactones	1.625	1.9326	1.7815	1.6724	1.5852	1.6865	1.575	1.8483	2.0379	1.8377	1.7423	1.5972	1.7722	1.7449	1.733
neg_4471	Furanofukinin	metab_12176	-	-	-	HMDB0036640	neg	-	-	-	-	Lipids and lipid-like molecules	Prenol lipids	293.175	M+FA-H	C16H24O2	6.7812	0.00987968	-	73.8	-4.45633	34335-93-8	Sesquiterpenoids	2.7621	3.0014	2.8591	2.786	2.6999	2.8131	2.7186	2.9403	3.149	2.8905	2.856	2.6962	2.845	2.8521	2.8528
neg_4477	Tetradecanedioic acid	metab_12182	-	-	C11002	LMFA01170018;HMDB0000872	neg	-	-	-	-	Lipids and lipid-like molecules	Fatty Acyls	257.175	M-H	C14H26O4	6.7717	0.0370444	74.6	-	-3.13665	821-38-5	Fatty acids and conjugates	2.8774	2.7577	2.7638	3.0164	2.7155	2.8792	2.9971	2.9539	3.0183	2.8881	2.9837	1.98	2.8284	2.8572	2.8559
neg_4501	Neocnidilide	metab_12206	-	-	C17002	HMDB0034450	neg	-	-	-	-	Organoheterocyclic compounds	Isobenzofurans	239.128	M+FA-H	C12H18O2	6.6845	0.0523701	-	68.3	-3.57388	4567-33-3	Not Available	1.765	1.8088	1.9252	1.8389	1.7441	1.7974	1.6755	1.8251	1.8722	1.7909	1.7372	1.8759	1.823	1.8001	1.8449
neg_4506	Arginyl-Phenylalanine	metab_12211	-	-	-	HMDB0028716	neg	-	-	-	-	Organic acids and derivatives	Carboxylic acids and derivatives	342.155	M+Na-2H	C15H23N5O3	6.6652	0.0633475	-	76.4	-0.219098	-	Amino acids, peptides, and analogues	1.423	1.4633	1.0778	1.8552	1.2249	0.7389	2.2527	0.7759	2.0267	0.8967	2.2001	1.1489	1.7192	1.7714	1.76
neg_4508	Dihydroisomorphine-3-glucuronide	metab_12213	-	-	-	HMDB0060820	neg	-	-	-	-	Alkaloids and derivatives	Morphinans	444.166	M-H2O-H	C23H29NO9	6.6557	0.22566	-	98.1	-1.74728	-	Not Available	0.5473	1.4388	0.4808	1.0953	0.8263	1.1532	1.216	1.0395	0.5549	1.1862	1.2521	0.4877	0.98	1.1638	1.0935
neg_4514	2alpha-Hydroxyalantolactone	metab_12219	-	-	-	HMDB0030910	neg	-	-	-	-	Lipids and lipid-like molecules	Prenol lipids	293.138	M+FA-H	C15H20O3	6.6459	0.139996	-	55.9	-4.46266	68776-45-4	Terpene lactones	1.1864	1.1987	1.2958	1.3959	1.382	1.2458	1.166	1.8959	1.3836	1.1003	1.1508	0.9641	1.3161	1.3285	1.2187
neg_4526	3a,7a,12b-Trihydroxy-5b-cholanoic acid	metab_12231	-	-	-	HMDB0000312	neg	-	-	-	-	Lipids and lipid-like molecules	Steroids and steroid derivatives	407.277	M-H	C24H40O5	6.5892	0.130899	-	97	-7.14494	71883-64-2	Bile acids, alcohols and derivatives	1.5528	1.4158	1.3102	1.6733	1.4792	1.3452	1.2594	1.689	1.4923	1.3463	1.2477	1.3543	1.4591	1.3742	1.4817
neg_4547	12,13-DiHODE	metab_12252	-	-	-	HMDB0010201	neg	-	-	-	-	Lipids and lipid-like molecules	Fatty Acyls	333.205	M+Na-2H	C18H32O4	6.5167	0.0601344	-	53.4	1.48217	-	Lineolic acids and derivatives	2.2885	1.6609	1.3708	1.6134	1.159	1.6583	1.8136	1.7836	1.8958	1.7268	1.8168	1.6435	1.8469	1.7954	1.8243
neg_4560	2alpha-Hydroxypyracrenic acid	metab_12265	-	-	-	HMDB0029780	neg	-	-	-	-	Lipids and lipid-like molecules	Prenol lipids	669.352	M+Cl	C39H54O7	6.4587	0.0596847	-	96.8	-7.14272	182682-96-8	Triterpenoids	1.171	1.1443	1.2539	1.2585	1.5788	1.4533	1.4352	1.3693	1.3993	1.4255	1.2745	0.7726	1.3094	1.2887	1.3376
neg_4568	(S)-3-Hydroxy-N-methylcoclaurine	metab_12273	map01100	Metabolic pathways	C05202	HMDB0006921	neg	-	-	Metabolism	Global and overview maps	Organoheterocyclic compounds	Isoquinolines and derivatives	350.119	M+Cl	C18H21NO4	6.4394	0.143491	-	58.8	7.17613	-	Benzylisoquinolines	1.1739	1.3676	1.3926	1.4607	1.1871	1.2512	1.4393	1.1609	1.5696	1.2138	1.5801	1.3542	1.3522	1.4057	1.4713
neg_4569	1,11-Undecanedicarboxylic acid	metab_12274	-	-	-	HMDB0002327	neg	-	-	-	-	Lipids and lipid-like molecules	Fatty Acyls	243.159	M-H	C13H24O4	6.4394	0.14197	83.7	-	-3.01796	505-52-2	Fatty acids and conjugates	2.5643	2.6151	2.5648	2.8248	2.8638	2.6837	2.9109	2.4777	2.9112	2.5101	2.9118	2.417	2.701	2.714	2.81
neg_4577	(9E)-10-nitrooctadecenoic Acid	metab_12282	-	-	-	HMDB0062737	neg	-	-	-	-	Lipids and lipid-like molecules	Fatty Acyls	372.237	M+FA-H	C18H33NO4	6.4012	0.111982	-	96.1	-6.76039	-	Fatty acids and conjugates	1.8485	1.9324	2.0143	1.7965	1.6539	1.7833	1.8114	1.9476	2.0261	1.5667	1.8305	1.8136	1.8381	1.8258	1.7469
neg_4591	Auraptene	metab_12296	-	-	-	HMDB0034054	neg	-	-	-	-	Lipids and lipid-like molecules	Prenol lipids	319.131	M+Na-2H	C19H22O3	6.3629	0.0943031	-	57.8	-2.56187	495-02-3	Terpene lactones	1.6514	1.6605	1.2196	1.3797	1.4901	1.3772	1.5525	1.4116	0.4444	1.5361	1.8295	0.9614	1.3702	1.3399	1.4171
neg_4593	8-iso-15-keto-PGE2	metab_12298	-	-	-	HMDB0002341;LMFA03110009	neg	-	-	-	-	Lipids and lipid-like molecules	Fatty Acyls	331.191	M-H2O-H	C20H30O5	6.3534	0.229754	-	53.6	-2.67548	914804-63-0	Eicosanoids	2.6626	0.41	0.4611	0.4785	0.7016	0.3254	0.526	0.7534	1.3207	0.6637	0.3379	0.9837	1.4384	1.3121	1.2587
neg_4598	17beta-Estradiol-3,4-quinone	metab_12303	-	-	-	HMDB0060085	neg	-	-	-	-	Lipids and lipid-like molecules	Steroids and steroid derivatives	285.148	M-H	C18H22O3	6.3435	0.0484324	-	57.3	-4.22985	-	Oxosteroids	1.7564	1.6524	0.8462	2.5561	1.313	1.7877	1.5604	1.5587	1.5957	1.4596	1.5914	2.0433	1.8165	1.8249	1.8554
neg_4613	Estramustine	metab_12318	-	-	C11228	LMST02010038;HMDB0015327	neg	-	-	-	-	Lipids and lipid-like molecules	Steroids and steroid derivatives	476.113	M+K-2H	C23H31Cl2NO3	6.3052	0.0978552	-	94.8	-8.12002	2998-57-4	Estrane steroids	1.2589	1.2198	1.4384	1.2792	1.1888	1.2786	0.9233	1.2766	1.313	1.3231	1.2827	1.1381	1.2898	1.2174	1.2276
neg_4618	Cis-Resveratrol 3-sulfate	metab_12323	-	-	-	HMDB0041712	neg	-	-	-	-	Phenylpropanoids and polyketides	Stilbenes	329.011	M+Na-2H	C14H12O6S	6.2959	0.116163	-	75.1	3.30235	-	Not Available	1.0418	1.8492	1.57	1.3044	1.842	1.8033	1.4503	1.2954	1.6079	1.1768	0.7672	0.7449	1.4316	1.3833	1.4806
neg_4632	Salviaflaside methyl ester	metab_12337	-	-	-	HMDB0033706	neg	-	-	-	-	Organic oxygen compounds	Organooxygen compounds	573.103	M+K-2H	C25H28O13	6.2484	0.265929	-	62.3	2.43496	178860-70-3	Carbohydrates and carbohydrate conjugates	1.7296	1.1252	1.5793	0.9471	1.4253	1.5195	1.3952	1.488	1.1613	1.7101	0.6796	1.872	1.4929	1.6631	1.7264
neg_4635	Crustecdysone	metab_12340	-	-	C02633	HMDB0030180	neg	-	-	-	-	Lipids and lipid-like molecules	Steroids and steroid derivatives	517.257	M+K-2H	C27H44O7	6.2392	0.154099	-	61.6	0.396181	5289-74-7	Bile acids, alcohols and derivatives	1.6678	1.6313	1.2321	1.844	0.7249	0.0567	1.752	0.5294	1.3849	0.9398	1.274	0.1703	1.4552	1.3488	1.3474
neg_4636	Gibberellin A110	metab_12341	-	-	-	HMDB0032010	neg	-	-	-	-	Lipids and lipid-like molecules	Prenol lipids	347.185	M-H	C20H28O5	6.2392	0.140145	-	74	-3.26466	-	Monoterpenoids	2.0667	0.6987	0.719	1.0555	0.7496	1.0214	0.258	0.8045	0.4177	0.9067	0.6979	0.6764	1.1857	1.1687	1.2721
neg_4648	10-Undecenal	metab_12353	-	-	-	HMDB0031128;LMFA06000067	neg	-	-	-	-	Organic oxygen compounds	Organooxygen compounds	213.149	M+FA-H	C11H20O	6.2112	0.102923	-	97.3	-4.46054	112-45-8	Carbonyl compounds	1.1693	1.4251	1.0019	0.9614	1.3756	1.2028	1.1903	1.6154	1.4124	1.1935	1.8721	1.3851	1.3768	1.2969	1.3688
neg_4653	N2-Galacturonyl-L-lysine	metab_12358	-	-	-	HMDB0033105	neg	-	-	-	-	Organic acids and derivatives	Carboxylic acids and derivatives	343.112	M+Na-2H	C12H22N2O8	6.202	0.0399482	-	79	-0.698105	220718-56-9	Amino acids, peptides, and analogues	1.4724	1.6384	1.6883	1.8914	1.2352	0.5619	1.3865	1.1266	2.0288	0.9889	1.8311	1.349	1.7967	1.7645	1.7718
neg_4661	Tanacetin	metab_12366	-	-	-	HMDB0035715	neg	-	-	-	-	Lipids and lipid-like molecules	Prenol lipids	309.133	M+FA-H	C15H20O4	6.183	0.0103091	-	86.7	-5.72241	1401-54-3	Terpene lactones	1.4094	1.6524	1.5968	1.6576	1.6733	1.582	1.3469	1.7751	1.5284	1.5784	1.3101	1.6148	1.551	1.549	1.5573
neg_4665	3-Hydroxyisovalerylcarnitine	metab_12370	-	-	-	HMDB0061189;LMFA07070041	neg	-	-	-	-	Lipids and lipid-like molecules	Fatty Acyls	299.114	M+K-2H	C12H24NO5+	6.164	0.120123	-	69.6	-1.40975	-	Fatty acid esters	0.8709	1.225	1.2728	1.3561	1.2207	1.0894	1.0742	1.1297	1.2383	1.2721	1.2148	1.1133	1.1702	1.178	1.0875
neg_4666	(±)-3-Hydroxynonanoic acid	metab_12371	-	-	-	HMDB0031513	neg	-	-	-	-	Organic acids and derivatives	Hydroxy acids and derivatives	173.118	M-H	C9H18O3	6.164	0.104215	-	92.8	-2.20213	88930-09-0	Medium-chain hydroxy acids and derivatives	1.4136	1.313	1.5657	1.3517	1.2188	1.2059	1.1113	1.1705	1.2468	1.4695	1.1439	1.3695	1.2938	1.3695	1.3725
neg_4671	DIHYDRO-beta-TUBAIC ACID	metab_12376	-	-	-	-	neg	-	-	-	-	-	-	235.097	M-H	C13H16O4	6.1451	0.0702524	57.4	-	-3.10219	-	-	1.0418	1.0103	1.1575	1.1769	1.0438	1.0806	0.8777	1.1116	1.0306	1.2366	0.9544	1.1587	1.1464	1.1073	1.0925
neg_4675	Farnesiferol A	metab_12380	-	-	-	HMDB0029488	neg	-	-	-	-	Phenylpropanoids and polyketides	Coumarins and derivatives	417.186	M+Cl	C24H30O4	6.1306	0.156495	-	90.8	4.55309	511-33-1	Not Available	0.9286	1.229	1.3452	1.4707	1.4087	1.5628	1.1586	1.4165	1.6692	1.2157	1.2434	1.4473	1.4038	1.2806	1.3932
neg_4687	11-Hydroxy-9-tridecenoic acid	metab_12392	-	-	-	LMFA01050437;HMDB0035881	neg	-	-	-	-	Lipids and lipid-like molecules	Fatty Acyls	273.17	M+FA-H	C13H24O3	6.1019	0.0731811	-	70.9	-3.55243	105798-56-9	Fatty acids and conjugates	1.3683	1.5404	0.9905	1.3182	1.7671	1.3689	2.3338	0.7941	1.5214	0.8744	2.2296	1.1131	1.7511	1.7007	1.6959
neg_4703	1-Hydroxyibuprofen	metab_12408	-	-	-	HMDB0060565	neg	-	-	-	-	Phenylpropanoids and polyketides	Phenylpropanoic acids	221.118	M-H	C13H18O3	6.0542	0.0784687	-	88.4	-2.87682	-	Not Available	1.5748	1.7227	1.8274	1.6812	1.6161	1.6695	1.6489	1.7558	1.8012	1.7671	1.8067	1.6719	1.7132	1.6667	1.7327
neg_4707	Questiomycin A	metab_12412	map00380	Tryptophan metabolism	C02161	HMDB0030483	neg	-	-	Metabolism	Amino acid metabolism	Organoheterocyclic compounds	Benzoxazines	257.058	M+FA-H	C12H8N2O2	6.0349	0.20703	-	88.9	4.03715	1916-59-2	Phenoxazines	1.5493	1.6829	1.5882	1.6429	1.7561	1.5992	1.417	1.7723	1.7638	1.6776	1.7417	1.0926	1.5613	1.7053	1.5594
neg_4713	(24E)-3beta,15alpha,22S-Triacetoxylanosta-7,9(11),24-trien-26-oic acid	metab_12418	-	-	-	HMDB0035606	neg	-	-	-	-	Lipids and lipid-like molecules	Prenol lipids	657.359	M+FA-H	C36H52O8	6.0156	0.034635	-	52.2	-8.32872	112430-70-3	Triterpenoids	2.2778	2.1011	1.6603	1.948	2.2748	2.1286	2.2268	1.5501	2.044	2.1326	1.8132	2.2521	2.0784	2.1072	2.0868
neg_4721	Monic acid	metab_12426	-	-	-	HMDB0061154	neg	-	-	-	-	Lipids and lipid-like molecules	Fatty Acyls	387.201	M+FA-H	C18H30O6	5.9962	0.0471296	-	84	-5.54817	-	Fatty acids and conjugates	1.8715	1.9084	1.6253	1.1182	1.8048	1.5016	1.8407	1.8661	1.6646	1.859	1.3159	1.3651	1.6494	1.6561	1.6865
neg_4725	Suillin	metab_12430	-	-	-	HMDB0034349	neg	-	-	-	-	Lipids and lipid-like molecules	Prenol lipids	475.263	M+Cl	C28H40O4	5.9769	0.192095	-	81.4	3.14929	103538-03-0	Diterpenoids	0.8724	0.919	0.7877	1.3905	1.145	2.0147	0.8919	1.284	1.0218	0.9262	0.8192	1.4468	1.2859	1.2167	1.3738
neg_4739	Diflorasone	metab_12444	-	-	-	HMDB0014368	neg	-	-	-	-	Lipids and lipid-like molecules	Steroids and steroid derivatives	431.169	M+Na-2H	C22H28F2O5	5.9187	0.0434384	-	93.1	9.52916	2557-49-5	Hydroxysteroids	1.7437	1.6585	1.8016	1.7959	2.052	1.6756	1.5965	1.6859	1.6838	1.7065	1.6819	1.7754	1.7194	1.7413	1.7564
neg_4742	11beta-PGE2	metab_12447	-	-	-	LMFA03010060	neg	-	-	-	-	-	-	351.216	M-H	C20H32O5	5.9089	0.0691465	61.2	-	-5.0804	-	-	2.5349	1.9728	1.7659	2.0664	1.7035	2.1212	2.2106	2.2678	2.229	2.1856	2.0686	1.9071	2.1322	2.1764	2.1903
neg_4748	Gibberellin A61	metab_12453	-	-	-	HMDB0034987	neg	-	-	-	-	Lipids and lipid-like molecules	Prenol lipids	377.16	M+FA-H	C19H24O5	5.8896	0.070171	-	54.3	-1.82941	81826-98-4	Diterpenoids	1.0201	0.7499	0.9999	1.5145	1.2469	1.3378	1.2081	1.1726	1.6173	1.4709	1.5268	1.2416	1.2882	1.3458	1.3272
neg_4749	(8alpha,10beta,11beta)-3-Hydroxy-4,15-dinor-1(5)-xanthen-12,8-olide	metab_12454	-	-	-	HMDB0037244	neg	-	-	-	-	Organoheterocyclic compounds	Lactones	269.138	M+FA-H	C13H20O3	5.8896	0.14258	-	64.7	-5.93595	342372-61-6	Gamma butyrolactones	1.2951	1.083	1.2413	1.2777	1.462	0.9991	1.1677	1.1637	1.5032	1.3132	1.0858	1.1732	1.1878	1.2782	1.1747
neg_4754	11-beta-Hydroxyandrosterone-3-glucuronide	metab_12459	map01100;map00040;map04976	Metabolic pathways;Pentose and glucuronate interconversions;Bile secretion	C03033	LMST05010030;LMST05010055;HMDB0010351	neg	-	-	Metabolism;Metabolism;Organismal Systems	Global and overview maps;Carbohydrate metabolism;Digestive system	Organoheterocyclic compounds	Indoles and derivatives	481.242	M-H	C25H38O9	5.8704	0.0423363	-	53.2	-4.64757	-	Hydroxyindoles	1.8649	1.9172	1.7865	1.9961	2.1917	1.9223	2.1306	2.1326	2.1302	2.0694	2.0995	2.1329	2.0318	2.0671	2.0428
neg_4759	Anhydrocinnzeylanol	metab_12464	-	-	-	HMDB0036863	neg	-	-	-	-	Lipids and lipid-like molecules	Prenol lipids	347.185	M-H2O-H	C20H30O6	5.8421	0.11839	-	53.8	-4.79904	65230-04-8	Terpene lactones	1.4704	1.174	1.0853	1.3038	1.3047	1.1512	0.9755	1.368	1.3293	1.2847	1.0617	1.0022	1.2118	1.3012	1.297
neg_4766	Aflatoxin Ex2B1	metab_12471	-	-	-	HMDB0038807	neg	-	-	-	-	Phenylpropanoids and polyketides	Coumarins and derivatives	381.037	M+K-2H	C18H16O7	5.8132	0.201843	-	56.7	-3.91475	20421-12-9	Furanocoumarins	1.0083	1.3066	1.0047	0.8703	1.0533	1.1349	1.2394	1.3761	1.4468	1.1863	1.02	1.3233	1.0989	1.178	1.2629
neg_4773	Menthone 1,2-glyceryl ketal	metab_12478	-	-	-	HMDB0036139	neg	-	-	-	-	Lipids and lipid-like molecules	Prenol lipids	273.17	M+FA-H	C13H24O3	5.7941	0.0742268	-	76.1	-4.55454	63187-91-7	Monoterpenoids	1.3122	1.1488	0.5572	0.964	1.1005	0.938	1.9488	0.2711	1.2445	0.5675	1.7861	1.0496	1.3089	1.3696	1.3331
neg_4785	Norhydromorphone	metab_12490	-	-	-	HMDB0014004	neg	-	-	-	-	Alkaloids and derivatives	Morphinans	292.097	M+Na-2H	C16H17NO3	5.7364	0.0112935	-	61.1	4.27132	-	Not Available	1.6324	0.5627	0.1546	0.4247	0.1177	0.1138	0.4307	0.2507	0.1272	0.1506	0.85	0.1047	1.3753	1.3674	1.3669
neg_4793	1,4-Dihydroxy-2-naphthoic acid	metab_12498	map01100;map00130	Metabolic pathways;Ubiquinone and other terpenoid-quinone biosynthesis	C03657	-	neg	-	-	Metabolism;Metabolism	Global and overview maps;Metabolism of cofactors and vitamins	-	-	203.034	M-H	C11H8O4	5.7171	0.165979	66.7	-	-2.36949	-	-	1.0726	1.0855	0.8655	0.9856	1.2699	1.1727	0.5644	1.1781	1.119	1.2401	0.7332	0.6725	1.1257	1.0154	1.0166
neg_4797	Nordiazepam	metab_12502	-	-	C07486	HMDB0060538	neg	-	-	-	-	Organoheterocyclic compounds	Benzodiazepines	315.053	M+FA-H	C15H11ClN2O	5.6977	0.0413622	-	53.2	-4.40893	1088-11-5	1,4-benzodiazepines	1.5468	1.7342	1.6364	1.5053	1.7577	1.7819	1.7435	1.6464	1.7267	1.6846	1.5265	1.6169	1.7251	1.6966	1.6935
neg_4817	Thyroxine	metab_12522	map01100;map05320;map04976;map04918;map04919;map04080;map00350	Metabolic pathways;Autoimmune thyroid disease;Bile secretion;Thyroid hormone synthesis;Thyroid hormone signaling pathway;Neuroactive ligand-receptor interaction;Tyrosine metabolism	C01829	HMDB0000248	neg	Peptides;Hormones and transmitters;Hormones and transmitters	Amino acids;Other hormones;Neurotransmitters	Metabolism;Human Diseases;Organismal Systems;Organismal Systems;Organismal Systems;Environmental Information Processing;Metabolism	Global and overview maps;Immune diseases;Digestive system;Endocrine system;Endocrine system;Signaling molecules and interaction;Amino acid metabolism	Organic acids and derivatives	Carboxylic acids and derivatives	775.678	M-H	C15H11I4NO4	5.6114	0.0743255	-	59.5	-1.2402	51-48-9	Amino acids, peptides, and analogues	2.0102	1.9492	1.9001	2.049	1.8246	2.2645	1.7102	1.6744	1.5202	1.9564	1.5855	1.7171	1.8819	1.8322	1.8933
neg_4831	Methyl decanoate	metab_12536	-	-	-	LMFA07010454;HMDB0033848	neg	-	-	-	-	Lipids and lipid-like molecules	Fatty Acyls	231.16	M+FA-H	C11H22O2	5.5922	0.099227	-	78.6	-3.53086	110-42-9	Fatty acid esters	0.892	1.1598	0.955	1.014	0.731	0.6414	1.422	0.8183	1.4572	1.0479	1.6446	0.5684	1.1686	1.0977	1.1052
neg_4836	(-)-Nopol	metab_12541	-	-	-	HMDB0030002	neg	-	-	-	-	Lipids and lipid-like molecules	Prenol lipids	211.133	M+FA-H	C11H18O	5.5731	0.0102835	-	97.1	-2.81997	35836-73-8	Monoterpenoids	1.3134	1.4826	1.0109	0.6874	1.4795	0.9554	1.6945	0.7794	1.5775	0.9893	1.8954	0.1703	1.4192	1.4231	1.4145
neg_4839	2-Oxo-5,11(13)-eudesmadien-12,8-olide	metab_12544	-	-	-	HMDB0030911	neg	-	-	-	-	Lipids and lipid-like molecules	Prenol lipids	291.123	M+FA-H	C15H18O3	5.5539	0.0450372	-	74.3	-4.04091	68776-46-5	Terpene lactones	1.5011	1.8142	1.7217	1.1832	1.4458	1.6255	1.6434	1.8753	1.4758	1.895	1.6676	1.2417	1.6608	1.6337	1.6244
neg_4842	13'-Carboxy-gamma-tocotrienol	metab_12547	-	-	-	HMDB0012558	neg	-	-	-	-	Lipids and lipid-like molecules	Prenol lipids	475.265	M+Cl	C28H40O4	5.5251	0.0851828	-	51.4	7.48007	-	Quinone and hydroquinone lipids	1.5752	1.4392	1.4834	1.6408	1.5724	1.1443	1.5253	1.4332	1.3837	1.5409	1.2042	1.1937	1.4738	1.497	1.4259
neg_4844	1-Methoxy-3-(4-hydroxyphenyl)-2E-propenal 4'-glucoside	metab_12549	-	-	-	HMDB0034755	neg	-	-	-	-	Organic oxygen compounds	Organooxygen compounds	307.118	M-H2O-H	C16H22O7	5.5156	0.0370439	-	64.8	-0.956878	-	Carbohydrates and carbohydrate conjugates	1.7876	2.117	1.9797	1.9071	2.2869	1.9953	1.9809	1.9945	2.11	2.1199	1.8815	2.0856	2.0152	1.9905	2.0207
neg_4846	Dihydrocumambrin A	metab_12551	-	-	-	HMDB0036489	neg	-	-	-	-	Lipids and lipid-like molecules	Prenol lipids	289.144	M-H2O-H	C17H24O5	5.5059	0.115234	-	67.5	-1.83505	20482-39-7	Terpene lactones	2.1923	0.3816	0.8009	0.1152	0.4151	0.6514	0.4689	0.1098	0.6222	0.5827	0.2063	0.9598	1.1614	1.1649	1.242
neg_4855	Piperalol	metab_12560	-	-	-	HMDB0035767	neg	-	-	-	-	Organic oxygen compounds	Organooxygen compounds	297.169	M+FA-H	C15H24O3	5.4676	0.023277	-	78.8	-5.18755	100288-35-5	Alcohols and polyols	1.2575	1.2984	1.1737	1.3729	0.9391	0.7846	1.8466	0.9886	1.4846	0.9905	2.0595	0.8221	1.5203	1.5014	1.5066
neg_4858	3-Hydroxy-6,8-dimethoxy-7(11)-eremophilen-12,8-olide	metab_12563	-	-	-	HMDB0040756	neg	-	-	-	-	Lipids and lipid-like molecules	Prenol lipids	291.16	M-H2O-H	C17H26O5	5.4581	0.0428895	-	50.3	-1.09276	162613-65-2	Terpene lactones	2.6429	0.4943	0.7127	0.1224	0.3748	0.3932	0.3542	0.0216	0.001	0.4028	0.5075	0.2383	1.7315	1.7064	1.7423
neg_4870	Pelargonic acid	metab_12575	-	-	C01601	HMDB0000847;LMFA01010009	neg	-	-	-	-	Lipids and lipid-like molecules	Fatty Acyls	203.128	M+FA-H	C9H18O2	5.3909	0.0600028	-	83.5	-3.48326	112-05-0	Fatty acids and conjugates	1.3517	1.275	1.079	1.3885	1.5648	1.4113	1.2719	1.0817	1.1928	1.1503	1.144	0.9942	1.2237	1.1804	1.2232
neg_4877	Linalool oxide (trans-pyranoid)	metab_12582	-	-	-	HMDB0031440	neg	-	-	-	-	Organoheterocyclic compounds	Oxanes	215.128	M+FA-H	C10H18O2	5.3718	0.0716606	-	55.6	-3.04874	39028-58-5	Not Available	1.8115	1.529	1.3308	2.182	1.7066	1.4793	1.7727	1.4842	2.1173	1.9822	1.6521	0.9573	1.7125	1.679	1.7401
neg_4878	Baptifoline	metab_12583	-	-	C10755	HMDB0033481	neg	-	-	-	-	Alkaloids and derivatives	Lupin alkaloids	295.121	M+Cl	C15H20N2O2	5.3623	0.145169	-	72.4	-2.50816	732-50-3	Anagyrine-type alkaloids	1.47	1.4639	1.3125	1.4384	1.3437	1.3763	1.8401	1.4643	1.6547	1.6231	1.5613	1.226	1.4489	1.563	1.4769
neg_4881	Fluticasone 17beta-carboxylic acid	metab_12586	-	-	-	HMDB0061092	neg	-	-	-	-	Lipids and lipid-like molecules	Steroids and steroid derivatives	377.159	M-H2O-H	C21H26F2O5	5.3433	0.122323	-	89.4	5.8162	-	Androstane steroids	1.6599	1.2927	1.301	0.9908	1.684	1.4145	1.543	1.4038	1.6166	1.6166	0.9508	0.918	1.3927	1.4714	1.4932
neg_4896	Hydroxy-lacosamide	metab_12601	-	-	-	HMDB0061146	neg	-	-	-	-	Organic acids and derivatives	Carboxylic acids and derivatives	319.071	M+K-2H	C13H18N2O5	5.2764	0.0749603	-	51.4	4.42369	-	Amino acids, peptides, and analogues	1.4062	1.4765	1.4234	1.3847	1.6239	1.48	1.4514	1.6287	1.5846	1.5372	1.5294	1.2673	1.4873	1.4593	1.522
neg_4904	20-Hydroxy-leukotriene B4	metab_12609	map00590	Arachidonic acid metabolism	C04853	HMDB0001509	neg	-	-	Metabolism	Lipid metabolism	Lipids and lipid-like molecules	Fatty Acyls	397.222	M+FA-H	C20H32O5	5.2288	0.0867249	-	73.6	-2.11172	79516-82-8	Eicosanoids	2.146	0.6461	0.5332	0.2922	0.7587	0.5661	0.1712	0.318	0.1905	0.726	0.599	0.1672	1.266	1.3338	1.3242
neg_4911	STICTIC ACID	metab_12616	-	-	-	-	neg	-	-	-	-	-	-	385.058	M-H	C19H14O9	5.1999	0.0221815	52.6	-	3.09134	-	-	1.3461	1.8763	2.0927	0.4749	1.852	1.5804	1.8375	1.8557	1.003	1.312	1.6373	1.7635	1.6743	1.6926	1.6799
neg_4922	(S)-9-Hydroxy-10-undecenoic acid	metab_12627	-	-	-	LMFA01050436;HMDB0032662	neg	-	-	-	-	Organic acids and derivatives	Hydroxy acids and derivatives	245.139	M+FA-H	C11H20O3	5.1526	0.126439	-	74.4	-3.13254	-	Medium-chain hydroxy acids and derivatives	1.5036	1.5406	1.2368	1.188	1.3878	1.4408	1.8506	1.4469	1.4424	1.3435	1.8361	0.7609	1.5323	1.5641	1.4577
neg_4927	4,5-Dihydrovomifoliol	metab_12632	-	-	-	HMDB0040615	neg	-	-	-	-	Lipids and lipid-like molecules	Prenol lipids	271.154	M+FA-H	C13H22O3	5.1146	0.111306	-	59.6	-5.3919	142173-08-8	Sesquiterpenoids	1.2287	1.4002	1.083	1.4268	1.1436	1.3769	1.5829	1.2685	1.2493	1.1354	1.7054	1.2303	1.3369	1.3436	1.2581
neg_4934	6-Hydroxy-2,6-dimethyl-2,7-octadien-4-one	metab_12639	-	-	-	HMDB0034670	neg	-	-	-	-	Lipids and lipid-like molecules	Prenol lipids	213.113	M+FA-H	C10H16O2	5.0956	0.0364699	-	62.9	-4.15534	64661-54-7	Monoterpenoids	2.0794	2.0889	1.9204	2.3118	1.9399	1.6353	2.3591	1.713	2.3173	1.9835	2.3608	2.071	2.1003	2.1048	2.1292
neg_4953	(2'E,4'Z,7'Z,8E)-Colnelenic acid	metab_12658	map00592	alpha-Linolenic acid metabolism	C16320	HMDB0030996	neg	-	-	Metabolism	Lipid metabolism	Lipids and lipid-like molecules	Fatty Acyls	337.201	M+FA-H	C18H28O3	5.0004	0.0809451	-	81.3	-4.75873	52591-16-9	Fatty acids and conjugates	1.8069	1.7563	1.5769	1.6991	1.7227	1.8464	1.767	1.8134	1.752	1.6664	1.6299	1.0311	1.6578	1.6876	1.7262
neg_4956	1-Octen-3-yl glucoside	metab_12661	-	-	-	HMDB0032959	neg	-	-	-	-	Lipids and lipid-like molecules	Fatty Acyls	271.154	M-H2O-H	C14H26O6	4.9908	0.0292242	-	67.7	-3.11906	209863-00-3	Fatty acyl glycosides	1.576	1.4673	1.1392	1.2529	0.8001	1.2925	1.5196	1.3814	1.2305	1.6424	1.7033	0.7443	1.388	1.3943	1.3706
neg_4961	(8betaOH,10beta)-8-Hydroxy-3-oxo-7(11)-eremophilen-12,8-olide	metab_12666	-	-	-	HMDB0041227	neg	-	-	-	-	Lipids and lipid-like molecules	Prenol lipids	309.133	M+FA-H	C15H20O4	4.9719	0.0692282	-	94.1	-6.10675	171422-92-7	Terpene lactones	1.2956	1.4418	1.1374	0.9045	1.8784	1.4807	1.6508	0.9543	1.5481	1.4012	1.3463	0.9582	1.269	1.3229	1.3148
neg_4965	Wine lactone	metab_12670	-	-	-	HMDB0029691	neg	-	-	-	-	Organoheterocyclic compounds	Benzofurans	211.097	M+FA-H	C10H14O2	4.9436	0.177319	-	92.1	-2.56173	182699-77-0	Not Available	0.8043	1.0117	0.6328	1.1083	0.4322	0.2621	1.3827	0.3261	1.3601	0.3229	1.6018	0.6228	0.974	1.0743	1.1156
neg_4969	6''-Malonylcosmosiin	metab_12674	-	-	-	HMDB0037346	neg	-	-	-	-	Phenylpropanoids and polyketides	Flavonoids	517.097	M-H	C24H22O13	4.915	0.00465175	-	68.4	-3.34056	-	Flavonoid glycosides	2.0297	2.0483	2.1129	2.0865	2.0339	2.0852	2.0177	2.0795	2.0996	2.0289	2.0124	2.1355	2.0416	2.0378	2.0385
neg_4970	Glycinoeclepin B	metab_12675	-	-	-	HMDB0037035	neg	-	-	-	-	Lipids and lipid-like molecules	Prenol lipids	593.255	M+Cl	C31H42O9	4.9056	0.206494	-	83.7	5.14694	103847-17-2	Sesquiterpenoids	0.4337	0.2226	0.4814	1.2036	0.2337	0.311	1.428	1.1146	1.1063	1.0356	1.723	1.6433	1.0235	1.1843	1.1683
neg_4977	Pyrafoline D	metab_12682	-	-	-	HMDB0038828	neg	-	-	-	-	Organoheterocyclic compounds	Indoles and derivatives	392.184	M+FA-H	C23H25NO2	4.8579	0.00928281	-	83.2	-8.73154	138876-26-3	Carbazoles	1.1934	1.4305	0.7265	1.4149	1.583	1.4714	1.478	1.3266	1.5479	1.1815	0.5453	1.2028	1.2997	1.2956	1.3032
neg_4979	(R)-Shinanolone	metab_12684	-	-	-	HMDB0030580	neg	-	-	-	-	Benzenoids	Tetralins	237.076	M+FA-H	C11H12O3	4.8579	0.0733006	-	57.8	-3.59493	-	Not Available	1.5647	1.6515	1.4675	1.9182	1.5741	1.5515	1.634	1.5399	1.8809	1.6308	1.805	1.9398	1.6539	1.6542	1.707
neg_4981	3,4-Methyleneazelaic acid	metab_12686	-	-	-	HMDB0059744	neg	-	-	-	-	Lipids and lipid-like molecules	Fatty Acyls	193.086	M-H2O-H	C11H16O4	4.8486	0.100254	-	94.9	-2.69124	-	Fatty acids and conjugates	1.5457	1.7293	1.1189	1.0206	1.1396	1.1033	1.3391	1.6172	1.7578	0.8543	1.3862	1.1325	1.3352	1.3588	1.2766
neg_4983	Venoterpine	metab_12688	-	-	-	HMDB0030175	neg	-	-	-	-	Organoheterocyclic compounds	Pyridines and derivatives	130.067	M-H2O-H	C9H11NO	4.8389	0.094647	-	88.6	2.19517	17948-42-4	Not Available	0.1005	0.1495	0.3824	1.2109	0.3287	1.1857	0.313	0.2649	0.8107	0.8262	0.4594	2.1013	1.1516	1.1541	1.2177
neg_4991	Artemidiol	metab_12696	-	-	-	HMDB0030648	neg	-	-	-	-	Phenylpropanoids and polyketides	Isocoumarins and derivatives	279.086	M+FA-H	C13H14O4	4.782	0.0283862	-	64.7	-4.12881	54963-30-3	Not Available	1.5018	1.7119	1.4527	1.3699	1.5827	1.744	1.5807	2.0207	1.5197	1.8289	1.4059	1.5463	1.6506	1.6547	1.6731
neg_4994	Glutaminyltyrosine	metab_12699	-	-	-	HMDB0028809	neg	-	-	-	-	Organic acids and derivatives	Carboxylic acids and derivatives	330.105	M+Na-2H	C14H19N3O5	4.7726	0.0448529	-	97.9	-5.87441	457662-02-1	Amino acids, peptides, and analogues	1.9897	2.1422	1.9699	1.857	1.9607	2.1324	2.011	2.3321	1.8069	2.3057	1.9458	1.3958	2.0525	2.0201	2.0189
neg_4999	Biotripyrrin-a	metab_12704	-	-	-	HMDB0003323	neg	-	-	-	-	Organoheterocyclic compounds	Pyrroles	510.186	M+FA-H	C25H27N3O6	4.744	0.107265	-	58.4	-4.67574	158649-79-7	Substituted pyrroles	1.5879	1.6579	1.4071	1.9409	1.5367	1.7156	1.4521	1.5825	1.486	1.4497	1.3461	1.6002	1.6028	1.5137	1.5489
neg_5002	Enokipodin D	metab_12707	-	-	-	HMDB0038399	neg	-	-	-	-	Lipids and lipid-like molecules	Prenol lipids	283.097	M+Na-2H	C15H18O4	4.7346	0.163089	-	61.1	5.26218	359701-29-4	Quinone and hydroquinone lipids	0.6416	0.8058	1.0892	0.6028	1.6298	1.102	0.9189	0.7419	2.1378	0.7587	1.0742	0.1508	1.2558	1.2012	1.1217
neg_5012	Ganoderic acid H	metab_12717	-	-	-	HMDB0035987	neg	-	-	-	-	Lipids and lipid-like molecules	Prenol lipids	609.251	M+K-2H	C32H44O9	4.6681	0.0735887	-	51.6	6.88762	98665-19-1	Triterpenoids	0.2317	0.3957	0.9803	1.464	0.0252	0.0243	1.2526	1.6574	1.6145	0.8391	1.5721	1.633	1.2698	1.2244	1.283
neg_5014	Yangonin	metab_12719	-	-	C09980	HMDB0034144	neg	-	-	-	-	Phenylpropanoids and polyketides	Kavalactones	257.081	M-H	C15H14O4	4.6588	0.0212069	-	59.7	-3.2092	500-62-9	Not Available	1.5456	1.5154	1.3862	1.6563	1.5255	1.4496	1.6596	1.5349	1.5102	1.6511	1.557	1.3196	1.5496	1.5388	1.5319
neg_5018	Malathion	metab_12723	-	-	C07497	HMDB0014910	neg	-	-	-	-	Lipids and lipid-like molecules	Fatty Acyls	329.029	M-H	C10H19O6PS2	4.6398	0.110288	-	61.4	0.248666	121-75-5	Fatty acid esters	1.2449	1.4008	1.4427	1.3239	1.4017	1.3152	1.1343	1.4396	1.3394	1.3545	1.2516	1.2799	1.2622	1.3466	1.3407
neg_5021	(1alpha,2alpha,4betaH,6alpha,8R)-p-Menthane-2,6,8,9-tetrol	metab_12726	-	-	-	HMDB0039053	neg	-	-	-	-	Lipids and lipid-like molecules	Prenol lipids	203.128	M-H	C10H20O4	4.6398	0.0706157	-	87.8	-3.35844	402593-44-6	Monoterpenoids	1.5101	1.6075	1.3672	1.3498	1.3567	1.421	1.6214	1.2954	1.5518	1.3734	1.8757	1.121	1.4131	1.4519	1.4719
neg_5032	N-Isobutyrylglycine	metab_12737	-	-	-	-	neg	-	-	-	-	-	-	144.067	M-H	C6H11NO3	4.5731	0.189446	89.9	-	-0.383837	-	-	1.0883	0.7055	1.2912	1.257	0.7685	0.8254	1.225	0.6758	0.6051	0.6338	1.1668	1.6414	0.9872	1.0969	1.1394
neg_5039	N-Acetyl-b-glucosaminylamine	metab_12744	-	-	C01239	HMDB0001104	neg	-	-	-	-	Organic oxygen compounds	Organooxygen compounds	265.105	M+FA-H	C8H16N2O5	4.5638	0.238007	-	78.2	3.6489	-	Carbohydrates and carbohydrate conjugates	1.0248	1.3406	0.4386	0.8843	1.3804	1.2768	0.9413	0.3932	1.0767	0.7431	1.0387	0.9819	0.929	1.087	1.117
neg_5044	Oxazepam	metab_12749	-	-	C07359	HMDB0014980	neg	-	-	-	-	Organoheterocyclic compounds	Benzodiazepines	307.027	M+Na-2H	C15H11ClN2O2	4.5541	0.0201808	88.8	-	4.78718	604-75-1	1,4-benzodiazepines	1.4367	1.608	1.865	1.6342	1.5819	1.5402	1.5122	1.6931	1.6892	1.5203	1.9272	1.885	1.6905	1.7031	1.707
neg_5045	Polyethylene, oxidized	metab_12750	-	-	-	HMDB0032472	neg	-	-	-	-	Organic acids and derivatives	Keto acids and derivatives	243.123	M-H	C12H20O5	4.5541	0.0519044	-	70	-3.45592	68441-17-8	Medium-chain keto acids and derivatives	2.1564	2.3497	1.7481	2.0762	2.3219	2.322	2.2572	1.5741	2.1839	1.792	2.4217	2.2513	2.1755	2.2163	2.1812
neg_5061	2,4,6-Trimethyl-4-phenyl-1,3-dioxane	metab_12766	-	-	-	HMDB0036025	neg	-	-	-	-	Organoheterocyclic compounds	Dioxanes	251.128	M+FA-H	C13H18O2	4.4596	0.104464	-	51	-3.13616	5182-36-5	1,3-dioxanes	1.3387	1.3521	1.2561	1.3896	1.325	1.4098	1.2664	1.4942	1.3238	1.3687	1.2834	0.7191	1.3126	1.2913	1.3731
neg_5063	Hydroxydestruxin B	metab_12768	-	-	-	HMDB0040135	neg	-	-	-	-	Organic acids and derivatives	Peptidomimetics	590.355	M-H2O-H	C30H51N5O8	4.4503	0.0785771	-	64.8	-0.831634	-	Depsipeptides	1.1789	1.6015	1.1377	1.7013	1.3705	1.4322	1.1782	1.2695	1.524	1.1488	0.9252	1.4531	1.2989	1.3546	1.3
neg_5074	2-[4,6-dihydroxy-2-methoxy-3-(3-methylbut-2-en-1-yl)phenyl]acetic acid	metab_12779	-	-	-	HMDB0125455	neg	-	-	-	-	Benzenoids	Benzene and substituted derivatives	265.107	M-H	C14H18O5	4.4313	0.0341499	-	61.8	-3.51504	-	Phenylacetic acids	1.6221	1.9196	1.5407	1.6603	1.7499	1.7069	1.5571	1.8875	1.7265	1.8891	1.7103	1.1619	1.7168	1.6878	1.7013
neg_5086	Niazirin	metab_12791	-	-	-	HMDB0032807	neg	-	-	-	-	Organic oxygen compounds	Organooxygen compounds	278.103	M-H	C14H17NO5	4.3556	0.0777437	-	66.1	-2.72803	122001-32-5	Carbohydrates and carbohydrate conjugates	1.585	0.8571	1.8805	1.6409	0.9698	0.9072	1.2936	0.8201	1.1503	0.6872	1.5004	1.9027	1.4561	1.3964	1.4517
neg_5087	5-Amino-6-(4-hydroxy-2-butenoyl)-2,2-dimethyl-4-chromanone	metab_12792	-	-	-	HMDB0041329	neg	-	-	-	-	Organoheterocyclic compounds	Benzopyrans	274.111	M-H	C15H17NO4	4.3461	0.15456	-	78.2	9.92871	162287-97-0	1-benzopyrans	1.2387	1.2832	1.3137	1.217	1.3444	1.279	1.1507	1.1859	1.2954	1.2107	1.1236	1.2687	1.2154	1.2063	1.3165
neg_5089	Hydroxyvalerylglycine	metab_12794	-	-	-	HMDB0094717	neg	-	-	-	-	Organic acids and derivatives	Carboxylic acids and derivatives	349.165	2M-H	C7H13NO4	4.3275	0.0609616	-	60.3	8.63602	-	Amino acids, peptides, and analogues	1.4616	1.4738	1.2596	1.2455	1.6822	1.4566	1.3743	1.4106	1.4173	1.2604	1.0705	1.1167	1.3024	1.3497	1.3434
neg_5093	Glandulone C	metab_12798	-	-	-	HMDB0039859	neg	-	-	-	-	Lipids and lipid-like molecules	Prenol lipids	293.138	M+FA-H	C15H20O3	4.299	0.106981	-	64.1	-4.91777	-	Sesquiterpenoids	1.2193	1.2832	1.1424	1.2336	1.2093	1.2455	1.2676	1.2219	1.241	1.0102	0.9364	0.3615	1.0452	1.1305	1.1028
neg_5096	Tyrosol 4-sulfate	metab_12801	-	-	-	HMDB0041785	neg	-	-	-	-	Organic acids and derivatives	Organic sulfuric acids and derivatives	217.017	M-H	C8H10O5S	4.2896	0.10939	-	74.3	-2.63131	-	Arylsulfates	1.5203	1.2948	1.2504	1.2818	1.6164	1.7543	1.7755	1.5952	1.6475	1.7391	1.5224	1.2522	1.5556	1.4858	1.4717
neg_5104	Hexyl glucoside	metab_12809	-	-	-	HMDB0031688	neg	-	-	-	-	Lipids and lipid-like molecules	Fatty Acyls	245.139	M-H2O-H	C12H24O6	4.271	0.0647585	-	94.1	-3.49303	59080-45-4	Fatty acyl glycosides	1.1968	1.1515	0.7053	1.0993	1.0527	0.8906	1.3916	0.7761	1.0837	0.5163	1.5296	0.6698	1.1438	1.1921	1.1877
neg_5109	(x)-2-Heptanol glucoside	metab_12814	-	-	-	HMDB0035028	neg	-	-	-	-	Lipids and lipid-like molecules	Fatty Acyls	315.123	M+K-2H	C13H26O6	4.2428	0.0588587	-	64.7	4.05563	-	Fatty acyl glycosides	1.4964	1.5449	1.3056	1.2425	1.6566	1.5069	1.3425	1.507	1.4974	1.5542	1.1281	0.991	1.3783	1.406	1.4275
neg_5112	Dihydrowyerone acid	metab_12817	-	-	-	HMDB0039493	neg	-	-	-	-	Lipids and lipid-like molecules	Fatty Acyls	291.088	M+FA-H	C14H14O4	4.224	0.282208	-	82.5	1.53085	70711-57-8	Fatty acids and conjugates	0.8396	0.7875	1.0021	1.0549	1.0707	0.9546	0.7553	1.3944	0.8186	1.3389	0.4159	0.5552	1.0985	1.0352	0.8699
neg_5118	Quercetin 7-xyloside	metab_12823	-	-	-	HMDB0037927;LMPK12112177	neg	-	-	-	-	Phenylpropanoids and polyketides	Flavonoids	455.057	M+Na-2H	C20H18O11	4.1777	0.12911	-	51.2	-5.6206	82178-32-3	Flavonoid glycosides	1.271	0.3832	1.4903	1.4952	1.0663	0.5053	1.5277	1.1668	0.6438	0.3707	0.5465	1.6601	1.1641	1.0629	1.101
neg_5128	5-O-Desmethyldonepezil	metab_12833	-	-	-	HMDB0013958	neg	-	-	-	-	Organoheterocyclic compounds	Piperidines	346.179	M-H2O-H	C23H27NO3	4.1172	0.159686	-	78.2	-5.9741	-	Benzylpiperidines	1.2183	1.7421	1.7311	1.817	1.4661	2.0141	1.2032	1.6864	1.7266	1.1744	1.1915	1.6023	1.4724	1.4681	1.3485
neg_5143	4-Hydroxy-5-(phenyl)-valeric acid-O-sulphate	metab_12848	-	-	-	HMDB0059981	neg	-	-	-	-	Benzenoids	Benzene and substituted derivatives	273.043	M-H	C11H14O6S	4.0522	0.222387	-	71	-3.32324	-	Not Available	1.4343	1.7501	1.3792	0.2598	0.8487	0.9182	1.1627	1.3356	1.8616	0.5181	0.2506	0.6613	1.0118	1.1342	0.9713
neg_5150	Hydroxyoctanoic acid	metab_12855	-	-	-	HMDB0000711	neg	-	-	-	-	Lipids and lipid-like molecules	Fatty Acyls	205.108	M+FA-H	C8H16O3	4.0142	0.0365353	-	96.7	-2.85472	617-73-2	Fatty acids and conjugates	1.6051	1.5123	1.6817	1.4447	1.3561	1.3253	1.291	1.3627	1.443	1.5016	1.4922	1.4144	1.4608	1.4427	1.4733
neg_5156	Marmesin rhamnoside	metab_12861	-	-	-	HMDB0039564	neg	-	-	-	-	Phenylpropanoids and polyketides	Coumarins and derivatives	373.129	M-H2O-H	C20H24O8	3.9668	0.089359	-	63.8	-1.3357	142347-99-7	Furanocoumarins	1.6421	0.9046	0.8017	0.9139	1.3087	1.063	1.1706	0.8859	1.2677	1.1361	0.581	0.8562	1.0937	1.0847	1.1494
neg_5157	Indolelactic acid	metab_12862	map00380	Tryptophan metabolism	C02043	HMDB0000671	neg	-	-	Metabolism	Amino acid metabolism	Organoheterocyclic compounds	Indoles and derivatives	204.066	M-H	C11H11NO3	3.9668	0.10102	70.2	-	-2.97156	1821-52-9	Indolyl carboxylic acids and derivatives	1.8118	1.6801	1.5366	1.8494	1.7882	1.6262	1.5694	1.6111	1.8207	1.712	1.4289	1.7059	1.6744	1.6696	1.7445
neg_5160	5-Hydroxysulfamethoxazole	metab_12865	-	-	-	HMDB0060529	neg	-	-	-	-	Benzenoids	Benzene and substituted derivatives	305.995	M+K-2H	C10H11N3O4S	3.9292	0.0337625	-	65.5	-1.43427	-	Benzenesulfonamides	1.6327	1.6071	1.9787	1.2862	1.6346	2.0741	1.669	2.0033	1.2727	1.8776	1.1168	1.2902	1.7384	1.7117	1.7163
neg_5162	Genipic acid	metab_12867	-	-	-	HMDB0036072	neg	-	-	-	-	Organoheterocyclic compounds	Dihydrofurans	183.066	M-H	C9H12O4	3.9104	0.0439795	-	96.7	-2.31318	6902-76-7	Not Available	1.2801	1.4207	1.507	1.6441	1.4448	1.41	1.4573	1.4642	1.613	1.2968	1.4359	1.3619	1.4495	1.4511	1.4181
neg_5163	(+)-cis-5,6-Dihydro-5-hydroxy-4-methoxy-6-(2-phenylethyl)-2H-pyran-2-one	metab_12868	-	-	-	HMDB0029575	neg	-	-	-	-	Phenylpropanoids and polyketides	Kavalactones	293.102	M+FA-H	C14H16O4	3.901	0.0548649	-	61.5	-3.3866	52247-81-1	Not Available	1.7421	1.577	1.646	1.5308	1.5603	1.7756	1.851	2.1298	1.5589	2.0877	1.3181	0.961	1.6767	1.6686	1.712
neg_5168	Suberic acid	metab_12873	-	-	C08278	LMFA01170001;HMDB0000893	neg	Organic acids	Carboxylic acids	-	-	Lipids and lipid-like molecules	Fatty Acyls	173.081	M-H	C8H14O4	3.8542	0.0266902	67.3	-	-2.61594	505-48-6	Fatty acids and conjugates	2.5243	2.4945	2.2995	2.4936	2.4019	2.2901	2.679	2.4486	2.5159	2.4743	2.7502	2.1722	2.5331	2.527	2.5106
neg_5170	Nanaomycin	metab_12875	-	-	-	-	neg	-	-	-	-	-	-	301.071	M-H	C16H14O6	3.8357	0.0720391	58.1	-	-3.65704	-	-	1.7653	1.8992	1.5363	1.0615	2.0711	2.6667	1.7377	2.8141	1.9732	3.2036	1.7147	2.0265	2.3679	2.3776	2.4251
neg_5175	Narasin	metab_12880	-	-	-	HMDB0030448	neg	-	-	-	-	Lipids and lipid-like molecules	Prenol lipids	785.482	M+Na-2H	C43H72O11	3.7384	0.18873	-	76.4	-0.519691	55134-13-9	Terpene glycosides	2.1435	2.3324	2.2685	2.1633	2.3574	1.7527	1.9468	2.0552	2.3061	1.7652	2.1674	1.8336	2.2685	2.138	2.1295
neg_5190	4-(3-hydroxybutyl)-2-methoxyphenol	metab_12895	-	-	-	HMDB0135672	neg	-	-	-	-	Benzenoids	Phenols	241.107	M+FA-H	C11H16O3	3.6315	0.142805	-	63.5	-4.41807	-	Methoxyphenols	2.5155	2.3111	2.2989	2.0752	2.5062	2.328	2.4023	2.8556	2.1021	2.8463	2.1654	1.1618	2.4622	2.4745	2.3569
neg_5222	SN-38	metab_12927	map00983	Drug metabolism - other enzymes	C11173;C16641	HMDB0060510	neg	-	-	Metabolism	Xenobiotics biodegradation and metabolism	Alkaloids and derivatives	Camptothecins	437.134	M+FA-H	C22H20N2O5	3.4475	0.174746	-	67.4	-2.56356	-	Not Available	0.9542	1.1193	1.3524	0.5629	1.4646	1.4912	1.3457	1.4997	0.5988	1.2709	1.3299	1.3171	1.3804	1.3102	1.2351
neg_5243	S-aminomethyldihydrolipoamide	metab_12948	-	-	-	HMDB0006239;LMFA08010025	neg	-	-	-	-	Lipids and lipid-like molecules	Fatty Acyls	281.1	M+FA-H	C9H20N2OS2	3.4049	0.088384	-	54.5	0.167613	-	Fatty amides	1.5626	1.65	1.7029	1.7798	1.2613	1.4929	2.069	1.554	1.8276	1.1886	1.5195	2.2067	1.6713	1.6982	1.6231
neg_5248	Osmanthuside A	metab_12953	-	-	-	HMDB0038748	neg	-	-	-	-	Phenylpropanoids and polyketides	Cinnamic acids and derivatives	491.155	M+FA-H	C23H26O9	3.395	0.193905	-	66.3	-2.88667	97457-19-7	Hydroxycinnamic acids and derivatives	1.3657	1.2429	0.3578	0.893	1.3434	1.0215	1.0405	1.222	1.084	1.2108	0.8881	0.3628	1.106	0.9931	1.1494
neg_5254	1-Methylhypoxanthine	metab_12959	-	-	-	HMDB0013141	neg	-	-	-	-	Organoheterocyclic compounds	Imidazopyrimidines	131.037	M-H2O-H	C6H6N4O	3.3855	0.0469001	-	57	2.62755	1125-39-9	Purines and purine derivatives	1.786	1.8026	1.8982	1.8398	1.8745	1.8639	1.8645	1.8346	1.8292	1.8529	1.8138	1.7788	1.7774	1.743	1.7788
neg_5259	2-Hydroxydecanedioic acid	metab_12964	-	-	-	HMDB0000424	neg	-	-	-	-	Organic acids and derivatives	Hydroxy acids and derivatives	263.113	M+FA-H	C10H18O5	3.3757	0.133889	-	57.4	-3.76834	103963-71-9	Medium-chain hydroxy acids and derivatives	1.8703	1.7802	1.3031	2.0401	1.2796	1.0157	1.843	2.3172	2.2321	1.0908	1.8704	1.7888	1.8764	1.8179	1.9331
neg_5265	2-Octenedioic acid	metab_12970	-	-	-	LMFA01170085;HMDB0000341	neg	-	-	-	-	Lipids and lipid-like molecules	Fatty Acyls	217.071	M+FA-H	C8H12O4	3.347	0.296194	-	62.6	-3.16596	5698-50-0	Fatty acids and conjugates	0.7707	0.0579	0.0149	1.5579	1.8653	0.9124	2.3076	0.0161	0.0189	0.1267	1.7259	2.2483	1.6543	1.8797	1.6964
neg_5293	3-Methyladipic acid	metab_12998	-	-	-	HMDB0000555	neg	-	-	-	-	Lipids and lipid-like molecules	Fatty Acyls	159.066	M-H	C7H12O4	3.2521	0.0928389	59.7	-	-0.386434	3058-01-03	Fatty acids and conjugates	2.3765	2.4712	2.2367	2.4497	2.2496	2.3339	2.3979	2.4401	2.4723	2.3672	2.4701	2.3427	2.344	2.4204	2.3648
neg_5296	2'-O-Methyladenosine	metab_13001	-	-	C04779	HMDB0004326	neg	-	-	-	-	Nucleosides, nucleotides, and analogues	Purine nucleosides	326.113	M+FA-H	C11H15N5O4	3.2422	0.120049	-	52.4	8.91843	2140-79-6	Not Available	1.0357	1.3998	1.0758	1.1402	1.5668	1.5491	1.4872	1.1984	1.3235	1.0036	1.0026	1.6111	1.2808	1.2968	1.3714
neg_5297	Indoxylsulfuric acid	metab_13002	-	-	-	-	neg	-	-	-	-	-	-	212.002	M-H	C8H7NO4S	3.2422	0.0182915	82.3	-	-2.63338	-	-	3.9478	3.9389	3.5232	3.663	4.0701	4.1133	3.738	3.9562	3.9538	3.9869	3.7917	3.6547	3.8952	3.8832	3.8803
neg_5301	2-Hydroxy-4,7-dimethoxy-2H-1,4-benzoxazin-3(4H)-one	metab_13006	-	-	-	HMDB0037264	neg	-	-	-	-	Organoheterocyclic compounds	Benzoxazines	246.038	M+Na-2H	C10H11NO5	3.2327	0.139716	-	55.4	-3.12261	149182-67-2	Benzoxazinones	1.5697	1.5632	1.5588	1.8455	1.5771	1.8007	1.4975	1.5316	1.6147	1.7256	1.6068	1.3213	1.5244	1.6356	1.5538
neg_5303	N-Acetylarylamine	metab_13008	-	-	C07565	HMDB0001250	neg	-	-	-	-	Benzenoids	Benzene and substituted derivatives	134.062	M-H	C8H9NO	3.2327	0.0455304	-	69.9	3.2802	55576-55-1	Not Available	1.869	1.847	1.8188	2.1521	1.8621	2.0657	1.8025	1.7598	1.9017	1.8951	1.8997	1.7242	1.9436	1.9053	1.9325
neg_5309	(4-ethyl-2-methoxyphenyl)oxidanesulfonic acid	metab_13014	-	-	-	HMDB0127988	neg	-	-	-	-	Organic acids and derivatives	Organic sulfuric acids and derivatives	231.032	M-H	C9H12O5S	3.2229	0.11676	-	65.7	-3.77235	-	Arylsulfates	1.4225	1.4509	0.8381	1.4528	1.3434	1.0601	0.9895	0.4623	1.2083	1.5767	0.6935	0.7928	1.2888	1.2765	1.1976
neg_5326	25-Cinnamoyl-vulgaroside	metab_13031	-	-	-	HMDB0041367	neg	-	-	-	-	Lipids and lipid-like molecules	Prenol lipids	565.323	M-H	C34H46O7	3.1844	0.0577553	-	60.1	9.58713	172616-90-9	Sesterterpenoids	2.7467	2.8755	2.9376	3.0193	3.0229	2.8558	2.8414	3.0287	3.0031	2.7167	3.0335	3.1371	2.9282	2.9206	2.9667
neg_5332	Epsilon-caprolactam	metab_13037	map01100	Metabolic pathways	C06593	HMDB0062769	neg	-	-	Metabolism	Global and overview maps	Organoheterocyclic compounds	Lactams	158.082	M+FA-H	C6H11NO	3.1751	0.113944	-	62.4	-3.69097	105-60-2	Caprolactams	1.2881	0.77	0.5728	1.458	0.4833	0.5178	0.9701	0.7998	1.4351	0.5464	1.8004	1.9434	1.3449	1.2533	1.2861
neg_5336	LysoPE(0:0/14:1(9Z))	metab_13041	-	-	-	HMDB0011471;LMGP02050034	neg	-	-	-	-	Lipids and lipid-like molecules	Glycerophospholipids	468.234	M+FA-H	C19H38NO7P	3.1562	0.245415	-	96.1	-7.2537	-	Glycerophosphoethanolamines	1.0335	1.4047	0.8465	1.2842	1.3435	1.3805	1.2021	1.5176	1.3077	1.173	1.493	1.9001	1.3259	1.405	1.1968
neg_5340	Quinoline-4,8-diol	metab_13045	map00380	Tryptophan metabolism	C05637	HMDB0060289	neg	-	-	Metabolism	Amino acid metabolism	Organoheterocyclic compounds	Quinolines and derivatives	160.04	M-H	C9H7NO2	3.1467	0.108491	-	86.1	-0.939317	-	Quinolones and derivatives	1.1815	1.2845	0.8422	0.7453	1.3983	1.686	1.4409	1.982	1.4171	1.8396	0.2528	1.2287	1.2974	1.3826	1.3202
neg_5364	O-methoxycatechol-O-sulphate	metab_13069	-	-	-	HMDB0060013	neg	-	-	-	-	Organic acids and derivatives	Organic sulfuric acids and derivatives	203.002	M-H	C7H8O5S	3.0527	0.121751	-	54.8	-1.97301	-	Arylsulfates	1.1212	0.9963	0.6753	1.5257	0.9225	2.4389	1.4586	1.0292	1.5152	1.7769	1.929	0.6834	1.6239	1.5278	1.6167
neg_5368	Cysteinyl-Histidine	metab_13073	-	-	-	HMDB0028777	neg	-	-	-	-	Organic acids and derivatives	Carboxylic acids and derivatives	239.058	M-H2O-H	C9H14N4O3S	3.0434	0.0513126	-	53.5	-9.40176	-	Amino acids, peptides, and analogues	1.9696	2.2441	2.1055	2.2362	1.9199	2.1161	1.8926	1.9441	2.0749	2.2231	2.0224	2.1309	1.9802	1.9493	1.9926
neg_5381	2-Methoxyacetaminophen glucuronide	metab_13086	-	-	-	HMDB0240215	neg	-	-	-	-	Organic oxygen compounds	Organooxygen compounds	338.086	M-H2O-H	C15H19NO9	3.0047	0.0279552	-	60.8	-5.11159	53446-12-1	Carbohydrates and carbohydrate conjugates	1.6959	1.5057	1.5573	1.8825	1.2185	1.7114	1.878	2.3266	1.969	1.8044	2.0945	1.5975	1.8134	1.8047	1.8282
neg_5390	Tyrosyl-Asparagine	metab_13095	-	-	-	HMDB0029100	neg	-	-	-	-	Organic acids and derivatives	Carboxylic acids and derivatives	276.098	M-H2O-H	C13H17N3O5	2.9757	0.134791	-	62	-3.3013	-	Amino acids, peptides, and analogues	1.5088	1.7331	1.3028	1.6017	1.8031	2.0068	1.9094	1.5761	1.5241	1.5688	1.5277	2.0066	1.6929	1.7892	1.6931
neg_5394	Viniferifuran	metab_13099	-	-	-	HMDB0033646	neg	-	-	-	-	Phenylpropanoids and polyketides	2-arylbenzofuran flavonoids	497.125	M+FA-H	C28H20O6	2.9566	0.102424	-	93.9	0.784715	223591-26-2	Not Available	1.2457	1.3241	1.6482	1.4801	0.9443	1.5106	1.3658	1.4072	1.4073	1.3152	1.3324	1.4681	1.342	1.3967	1.3142
neg_5395	Methyl 3-hydroxybutyrate	metab_13100	-	-	-	HMDB0041603	neg	-	-	-	-	Organic acids and derivatives	Hydroxy acids and derivatives	235.118	2M-H	C5H10O3	2.9566	0.103771	-	95.1	-2.60958	1487-49-6	Beta hydroxy acids and derivatives	1.1389	1.5981	1.0937	1.6447	1.4892	1.532	1.6396	1.4291	1.8134	0.8946	1.2906	1.807	1.4399	1.5127	1.4385
neg_5400	Pyrocatechol	metab_13105	map01100	Metabolic pathways	C15571;C00090	HMDB0000957	neg	-	-	Metabolism	Global and overview maps	Benzenoids	Phenols	109.03	M-H	C6H6O2	2.9472	0.0830147	67.5	-	5.87525	120-80-9	Benzenediols	1.9726	1.8661	2.401	1.5501	2.4843	1.8086	1.795	2.3655	1.4978	2.5392	2.3244	2.4135	2.3451	2.2953	2.2768
neg_5427	N(omega)-Hydroxyarginine	metab_13132	map00330	Arginine and proline metabolism	C05933	HMDB0004224	neg	-	-	Metabolism	Amino acid metabolism	Organic acids and derivatives	Carboxylic acids and derivatives	227.055	M+K-2H	C6H14N4O3	2.8721	0.217911	-	74.2	0.105736	53054-07-2	Amino acids, peptides, and analogues	2.059	2.2067	1.9869	2.2774	2.0904	2.4024	2.2172	1.363	2.1075	2.294	2.2163	1.9894	2.1741	2.0436	2.236
neg_5432	3,4,5-trihydroxy-6-[1-(4-methoxyphenyl)-3-phenylpropoxy]oxane-2-carboxylic acid	metab_13137	-	-	-	HMDB0135640	neg	-	-	-	-	Lipids and lipid-like molecules	Fatty Acyls	455.114	M+K-2H	C22H26O8	2.8626	0.0763307	-	92.9	6.87563	-	Fatty acyl glycosides	1.8428	1.787	1.9524	1.9249	1.5709	1.7803	1.8064	1.7876	1.9441	1.735	1.8649	1.8524	1.8011	1.814	1.8621
neg_5433	Dide-O-methylsimmondsin	metab_13138	-	-	-	HMDB0041207	neg	-	-	-	-	Organic oxygen compounds	Organooxygen compounds	392.118	M+FA-H	C14H21NO9	2.8626	0.0108085	-	90.2	-5.09573	135074-86-1	Carbohydrates and carbohydrate conjugates	2.5634	2.6553	2.6427	2.6845	2.5065	2.5622	2.502	2.5883	2.6485	2.5538	2.5582	2.6117	2.5615	2.5703	2.5687
neg_5447	Benzyl sulfate	metab_13152	-	-	-	HMDB0034782	neg	-	-	-	-	Benzenoids	Benzene and substituted derivatives	233.012	M+FA-H	C7H8O4S	2.8197	0.24873	-	69.7	-5.21172	-	Not Available	1.2779	1.0318	0.1766	0.7001	1.3129	1.4559	1.1474	1.1909	1.3908	1.4256	1.0321	0.9256	1.0785	1.1797	1.2818
neg_5448	Adipic acid	metab_13153	map01100	Metabolic pathways	C06104	LMFA01170048;HMDB0000448	neg	Organic acids	Carboxylic acids	Metabolism	Global and overview maps	Lipids and lipid-like molecules	Fatty Acyls	145.051	M-H	C6H10O4	2.8197	0.132557	64.6	-	0.925597	124-04-9	Fatty acids and conjugates	1.888	1.5321	1.3888	1.9046	1.4467	1.3249	1.965	1.4123	1.8878	1.381	1.949	1.3326	1.6097	1.7153	1.7073
neg_5454	2-Methoxyacetaminophen sulfate	metab_13159	-	-	-	HMDB0062550	neg	-	-	-	-	Organic acids and derivatives	Organic sulfuric acids and derivatives	242.012	M-H2O-H	C9H11NO6S	2.8006	0.0473371	-	55.4	-3.21741	53446-13-2	Arylsulfates	1.313	1.2405	0.8883	1.3175	1.2446	1.4639	1.3887	1.8906	1.3203	1.3666	1.2001	0.8972	1.3325	1.333	1.3663
neg_5456	Indole-3-carboxilic acid-O-sulphate	metab_13161	-	-	-	HMDB0060002	neg	-	-	-	-	Organoheterocyclic compounds	Indoles and derivatives	239.996	M-H	C9H7NO5S	2.7908	0.18362	-	88.2	-4.78281	-	Indolecarboxylic acids and derivatives	1.3827	1.1329	0.3554	1.0427	1.3798	1.3586	0.8847	1.9944	0.9417	1.1691	0.7867	0.3611	1.1914	1.1227	1.2715
neg_5465	13E-Tetranor-16-carboxy-LTE4	metab_13170	-	-	-	LMFA03020051;HMDB0012575	neg	-	-	-	-	Organic acids and derivatives	Carboxylic acids and derivatives	434.129	M+Na-2H	C19H27NO7S	2.7334	0.0280454	-	53.3	7.62956	-	Amino acids, peptides, and analogues	2.0841	2.0852	2.2108	2.1186	1.9634	2.0071	1.9703	2.1012	2.1936	1.8592	1.7968	1.8536	2.0332	2.0515	2.0289
neg_5470	Aspartyl-Arginine	metab_13175	-	-	-	HMDB0028747	neg	-	-	-	-	Organic acids and derivatives	Carboxylic acids and derivatives	310.115	M+Na-2H	C10H19N5O5	2.6864	0.210268	-	69.9	6.34024	-	Amino acids, peptides, and analogues	0.9525	1.1227	0.9121	0.9647	1.033	1.0523	0.9016	0.9587	1.0929	1.0428	1.1507	1.0524	0.9285	0.9947	1.0905
neg_5484	L-Phenylalanine	metab_13189	map01100;map04978;map01210;map02010;map01230;map00360;map04974;map00970;map00400;map05230	Metabolic pathways;Mineral absorption;2-Oxocarboxylic acid metabolism;ABC transporters;Biosynthesis of amino acids;Phenylalanine metabolism;Protein digestion and absorption;Aminoacyl-tRNA biosynthesis;Phenylalanine, tyrosine and tryptophan biosynthesis;Central carbon metabolism in cancer	C00079	HMDB0000159	neg	Peptides	Amino acids	Metabolism;Organismal Systems;Metabolism;Environmental Information Processing;Metabolism;Metabolism;Organismal Systems;Genetic Information Processing;Metabolism;Human Diseases	Global and overview maps;Digestive system;Global and overview maps;Membrane transport;Global and overview maps;Amino acid metabolism;Digestive system;Translation;Amino acid metabolism;Cancers: Overview	Organic acids and derivatives	Carboxylic acids and derivatives	164.072	M-H	C9H11NO2	1.9406	0.0516295	65	-	-0.373494	63-91-2	Amino acids, peptides, and analogues	3.2079	3.3164	3.3794	3.3316	3.2525	3.28	3.3873	3.3127	3.4463	3.1703	3.2639	3.3939	3.2931	3.2906	3.3301
neg_5490	Kynurenine	metab_13195	map01100;map05143;map00380	Metabolic pathways;African trypanosomiasis;Tryptophan metabolism	C00328;C01718	-	neg	-	-	Metabolism;Human Diseases;Metabolism	Global and overview maps;Infectious diseases: Parasitic;Amino acid metabolism	-	-	207.077	M-H	C10H12N2O3	1.8601	0.0348766	81.6	-	-2.24364	-	-	2.0894	2.19	2.1775	2.3485	2.1505	2.169	2.2933	2.1252	2.0541	2.1896	2.2532	1.9841	2.1205	2.1497	2.1421
neg_5504	D-Arabinose	metab_13209	-	-	C00216	HMDB0029942	neg	Carbohydrates	Monosaccharides	-	-	Organic oxygen compounds	Organooxygen compounds	171.027	M+Na-2H	C5H10O5	1.3447	0.0953639	-	80.3	-4.49544	147-81-9	Carbohydrates and carbohydrate conjugates	1.7377	1.7899	1.5994	1.6602	1.6906	1.7196	1.7566	1.6271	1.8912	1.6982	1.7811	1.8781	1.8102	1.7455	1.7378
neg_5511	Inosine triphosphate	metab_13216	map00230	Purine metabolism	C00081	HMDB0000189	neg	-	-	Metabolism	Nucleotide metabolism	Nucleosides, nucleotides, and analogues	Purine nucleotides	506.971	M-H	C10H15N4O14P3	1.168	0.26919	-	91.6	-1.94295	132-06-9	Purine ribonucleotides	1.2642	1.1268	1.2321	1.251	1.1713	1.4098	1.2695	1.3956	1.3791	1.2171	1.1404	1.3524	1.2198	1.4404	1.425
neg_5517	3-hydroxy-2-methyl-2-[(sulfooxy)methyl]propanoic acid	metab_13222	-	-	-	HMDB0127651	neg	-	-	-	-	Organic acids and derivatives	Hydroxy acids and derivatives	234.988	M+Na-2H	C5H10O7S	1.0778	0.16127	-	75.8	-5.55072	-	Beta hydroxy acids and derivatives	1.4256	1.6303	1.1669	1.5621	1.6431	1.5188	1.757	1.4415	1.8021	1.3116	1.6695	1.6123	1.6714	1.582	1.5408
neg_5520	L-Tyrosine	metab_13225	map01100;map00350;map00730;map00130;map01230;map05031;map05012;map01210;map00360;map04974;map00970;map04728;map05034;map00400;map05030;map05230;map04916;map04917	Metabolic pathways;Tyrosine metabolism;Thiamine metabolism;Ubiquinone and other terpenoid-quinone biosynthesis;Biosynthesis of amino acids;Amphetamine addiction;Parkinson's disease;2-Oxocarboxylic acid metabolism;Phenylalanine metabolism;Protein digestion and absorption;Aminoacyl-tRNA biosynthesis;Dopaminergic synapse;Alcoholism;Phenylalanine, tyrosine and tryptophan biosynthesis;Cocaine addictio…	C00082	HMDB0000158	neg	Peptides	Amino acids	Metabolism;Metabolism;Metabolism;Metabolism;Metabolism;Human Diseases;Human Diseases;Metabolism;Metabolism;Organismal Systems;Genetic Information Processing;Organismal Systems;Human Diseases;Metabolism;Human Diseases;Human Diseases;Organismal Systems;Organismal Systems	Global and overview maps;Amino acid metabolism;Metabolism of cofactors and vitamins;Metabolism of cofactors and vitamins;Global and overview maps;Substance dependence;Neurodegenerative diseases;Global and overview maps;Amino acid metabolism;Digestive system;Translation;Nervous system;Substance dependence;Amino acid metabolism;Substance dependence;Cancers: Overview;Endocrine system;Endocrine system	Organic acids and derivatives	Carboxylic acids and derivatives	180.066	M-H	C9H11NO3	1.0446	0.0806651	55.7	-	-3.04806	60-18-4	Amino acids, peptides, and analogues	2.2591	2.3625	2.2898	2.4604	2.3301	2.4321	2.2926	2.2888	2.4211	2.3066	2.351	2.404	2.3749	2.3773	2.3142
neg_5538	3-Acetyl-4-hydroxy-6-methyl-2H-pyran-2-one	metab_13243	-	-	-	HMDB0033129	neg	-	-	-	-	Organic oxygen compounds	Organooxygen compounds	213.04	M+FA-H	C8H8O4	0.8065	0.213023	-	69.2	-0.245458	771-03-9	Carbonyl compounds	0.4662	2.254	0.2935	0.8101	1.7304	0.6343	0.3186	1.1501	0.349	1.5634	0.3122	0.2985	1.4871	1.3617	1.3236
neg_5551	L-Oxalylalbizziine	metab_13256	-	-	-	HMDB0039164	neg	-	-	-	-	Organic acids and derivatives	Carboxylic acids and derivatives	200.029	M-H2O-H	C6H9N3O6	0.7779	0.0363271	-	59.2	-9.44173	99694-81-2	Amino acids, peptides, and analogues	2.8821	3.0995	3.2628	2.8559	2.9416	2.8965	2.8667	2.9657	3.1164	3.0506	2.8066	2.769	2.887	2.8866	2.9138
neg_5585	2-hydroxyacrylic Acid	metab_13290	-	-	-	HMDB0062676	neg	-	-	-	-	Organic acids and derivatives	Carboxylic acids and derivatives	263.039	3M-H	C3H4O3	0.748	0.0605096	-	78.3	-5.1615	-	Carboxylic acids	1.5506	1.657	1.3015	1.8645	2.57	1.4308	2.4066	1.3689	1.8159	1.6787	1.6297	2.2286	2.0797	2.0401	2.0316
neg_5588	Aconitic acid	metab_13293	map01100;map01210;map00020;map00630	Metabolic pathways;2-Oxocarboxylic acid metabolism;Citrate cycle (TCA cycle);Glyoxylate and dicarboxylate metabolism	C00417;C02341	-	neg	Organic acids	Carboxylic acids	Metabolism;Metabolism;Metabolism;Metabolism	Global and overview maps;Global and overview maps;Carbohydrate metabolism;Carbohydrate metabolism	-	-	173.009	M-H	C6H6O6	0.748	0.0884913	59.3	-	-2.35185	-	-	2.3667	2.3323	1.5861	1.7912	2.1572	2.257	2.2346	2.1774	2.447	2.3261	2.2176	2.2801	2.1973	2.2706	2.2579
neg_5589	Xanthine	metab_13294	map01100;map00230;map00232	Metabolic pathways;Purine metabolism;Caffeine metabolism	C00385	HMDB0000292	neg	-	-	Metabolism;Metabolism;Metabolism	Global and overview maps;Nucleotide metabolism;Biosynthesis of other secondary metabolites	Organoheterocyclic compounds	Imidazopyrimidines	151.026	M-H	C5H4N4O2	0.748	0.0460993	91.1	-	0.34281	69-89-6	Purines and purine derivatives	2.1468	2.5566	2.1359	2.149	2.2291	2.413	2.1403	2.2292	2.3158	2.1173	2.184	2.0009	2.209	2.1803	2.2191
neg_5599	D-N-(Carboxyacetyl)alanine	metab_13304	-	-	-	HMDB0039163	neg	-	-	-	-	Organic acids and derivatives	Carboxylic acids and derivatives	174.04	M-H	C6H9NO5	0.7374	0.0644164	-	51.8	-2.7743	19764-27-3	Amino acids, peptides, and analogues	1.5952	1.6568	1.4904	1.698	1.4809	1.583	1.383	1.4965	1.6977	1.6838	1.4826	1.529	1.5594	1.61	1.6045
neg_5611	(+)-threo-2-Amino-3,4-dihydroxybutanoic acid	metab_13316	-	-	-	LMFA01050439;HMDB0029389	neg	-	-	-	-	Organic acids and derivatives	Carboxylic acids and derivatives	116.036	M-H2O-H	C4H9NO4	0.699	0.0856499	-	72.9	5.65893	21768-44-5	Amino acids, peptides, and analogues	1.9906	1.922	1.8044	2.4858	1.2316	1.4953	1.3514	1.6056	2.1213	1.6033	1.7264	1.845	1.902	1.8337	1.8952
neg_5622	Aspartyl-L-proline	metab_13327	-	-	-	HMDB0002335	neg	-	-	-	-	Organic acids and derivatives	Carboxylic acids and derivatives	229.082	M-H	C9H14N2O5	0.6709	0.0578461	-	73.1	-3.70776	42155-95-3	Amino acids, peptides, and analogues	1.4266	1.4655	1.7524	1.4041	1.2714	1.5369	1.2446	1.6427	1.5109	1.2027	1.23	1.65	1.4592	1.5007	1.4594
neg_5624	N6-Acetyl-L-lysine	metab_13329	map00310	Lysine degradation	C02727	HMDB0000206	neg	-	-	Metabolism	Amino acid metabolism	Organic acids and derivatives	Carboxylic acids and derivatives	187.108	M-H	C8H16N2O3	0.6709	0.145466	-	97.2	-2.99678	692-04-6	Amino acids, peptides, and analogues	1.4801	1.4062	1.5203	1.6663	1.6859	1.7123	1.4482	1.7053	1.5604	1.5453	1.4586	1.4005	1.4822	1.5393	1.6046
neg_5639	D-1,5-Anhydrofructose	metab_13344	-	-	-	HMDB0041561	neg	-	-	-	-	Organoheterocyclic compounds	Oxanes	207.05	M+FA-H	C6H10O5	0.6614	0.141766	-	64.5	-4.23841	75414-43-6	Not Available	1.3499	1.0585	1.2323	1.3702	1.9415	1.4838	2.2429	1.1336	1.3205	1.4111	1.62	1.5658	1.731	1.6096	1.6767
neg_5649	Taurine	metab_13354	map01100;map00920;map00430;map02010;map00120;map04080	Metabolic pathways;Sulfur metabolism;Taurine and hypotaurine metabolism;ABC transporters;Primary bile acid biosynthesis;Neuroactive ligand-receptor interaction	C00245	HMDB0000251	neg	-	-	Metabolism;Metabolism;Metabolism;Environmental Information Processing;Metabolism;Environmental Information Processing	Global and overview maps;Energy metabolism;Metabolism of other amino acids;Membrane transport;Lipid metabolism;Signaling molecules and interaction	Organic acids and derivatives	Organic sulfonic acids and derivatives	124.008	M-H	C2H7NO3S	0.6522	0.294705	79.6	-	2.30204	107-35-7	Organosulfonic acids and derivatives	2.3038	2.0557	2.2979	2.5588	2.2564	2.4494	2.1497	2.4536	2.42	1.862	2.2392	2.1889	2.1478	2.414	2.3475
neg_5650	Aucubin	metab_13355	-	-	C09771	LMPR0102070006;HMDB0036562	neg	-	-	-	-	Lipids and lipid-like molecules	Prenol lipids	367.104	M+Na-2H	C15H22O9	0.6427	0.170451	-	58.9	9.39948	479-98-1	Terpene glycosides	1.8669	1.8663	2.023	1.8945	1.7662	1.9337	1.7992	2.13	2.1382	2.1118	1.9321	1.7966	2.0089	1.8979	2.0447
neg_5656	Allantoin	metab_13361	-	-	C01551	HMDB0000462	neg	-	-	-	-	Organoheterocyclic compounds	Azoles	157.037	M-H	C4H6N4O3	0.6427	0.0385776	65.6	-	-0.156632	97-59-6	Imidazoles	2.4289	2.5118	2.3506	2.6172	2.5202	2.4635	2.393	2.5557	2.6014	2.6747	2.5791	2.3662	2.5033	2.5233	2.5366
neg_5897	1-[(5-Amino-5-carboxypentyl)amino]-1-deoxyfructose	metab_13602	-	-	-	HMDB0034879	neg	-	-	-	-	Organic oxygen compounds	Organooxygen compounds	307.15	M-H	C12H24N2O7	0.5065	0.0148616	-	57.9	-3.82823	21291-40-7	Carbohydrates and carbohydrate conjugates	1.2847	1.2768	0.9493	1.2805	1.8609	1.3343	1.8859	1.2746	1.3801	1.3084	1.5929	1.7639	1.5918	1.599	1.5865
neg_5909	Phosphonoacetate	metab_13614	map00440	Phosphonate and phosphinate metabolism	C05682	HMDB0004110	neg	-	-	Metabolism	Metabolism of other amino acids	Organic acids and derivatives	Organic phosphonic acids and derivatives	174.956	M+Cl	C2H5O5P	0.0975	0.0295635	-	57.6	-7.79857	4408-78-0	Organic phosphonic acids	2.5793	2.601	2.623	2.597	2.5752	2.572	2.5492	2.5885	2.6512	2.6009	2.5744	2.6441	2.5927	2.6052	2.6183
